# Supplementary material for: Organocatalytic enantioselective synthesis of 2,3-dihydropyridazines
Source: Royal Society of Chemistry journal article supplement (doi:10.1039/c2cc17370k), 2011-12-12
Supplement: c2cc17370k.pdf [file c2cc17370k.pdf]

# Organocatalytic Enantioselective Synthesis of 2,3-Dihydropyridazines

Maitane Fernández, Jose L. Vicario,\* Efraím Reyes, Luisa Carrillo and Dolores Badía

[\*] Departamento de Química Orgánica II

Facultad de Ciencia y Tecnología

Universidad del País Vasco/Euskal Herriko Unibertsitatea (UPV/EHU)

P.O. Box 644, 48080 Bilbao (Spain)

Fax: (+34) 94-601-2748 E-mail: [jose Luis.vicario@ehu.es](mailto:jose Luis.vicario@ehu.es)

Homepage: <http://www.ehu.es/GSA>

## Contents

|                                               |          |
|-----------------------------------------------|----------|
| General Methods                               | page S2  |
| Materials                                     | page S2  |
| Experimental Procedures and Characterizations | page S3  |
| Determination of Absolute Configuration       | page S9  |
| NMR spectra                                   | page S10 |
| HPLC chromatograms                            | page S25 |

**General Methods.**<sup>1</sup> NMR spectra were acquired on a Bruker 300 spectrometer, running at 300 and 75 MHz for <sup>1</sup>H and <sup>13</sup>C, respectively. Chemical shifts (δ) are reported in ppm relative to residual solvent signals (CHCl<sub>3</sub>, 7.26 ppm for <sup>1</sup>H NMR, CDCl<sub>3</sub>, 77.0 ppm for <sup>13</sup>C NMR). The following abbreviations are used to indicate the multiplicity in <sup>1</sup>H NMR spectra: s, singlet; d, doublet; t, triplet; m, multiplet; bs, broad signal. <sup>13</sup>C NMR spectra were acquired on a broad band decoupled mode. IR spectra were measured in a Jasco FT/IR 4100 and only characteristic bands are given. Mass spectra (MS) were recorded on an Agilent 7890A gas chromatograph coupled to an Agilent 5975 mass spectrometer (EI). High resolution mass spectra (HRMS) were recorded on a micromass GCT spectrometer using chemical ionization (CI). X-ray data collections were performed in a Oxford Diffraction Xcalibur 2 diffractometer equipped with a Sapphire 2 CCD area detector, and a MoKα sealed-tube source with graphite monochromator (λ = 0.71073 Å, 0.5mm collimator). The sample was kept at 100(1)K with a Oxford Cryosystems Cryostream 700 cooler. Analytical thin layer chromatography (TLC) was performed using pre-coated aluminium-backed plates (Merck Kieselgel 60 F254) and visualized by ultraviolet irradiation or *p*-anisaldehyde dip.<sup>2</sup> Melting points (M.p.) were measured in a Büchi B-540 apparatus and are uncorrected. Optical rotations were measured on a Jasco P-2000 polarimeter. The enantiomeric excess (ee) of the products was determined by chiral stationary phase HPLC in a Waters 2695 chromatograph with a Waters 2998 photodiode array detector (Daicel Chiralpak IC and AD-H columns).

**Materials.** Analytical grade solvents and commercially available reagents were used without further purification. For flash chromatography (FC) silica gel (Silica gel 60, 230-400 mesh, Merck) was employed.

---

<sup>1</sup> SGIker technical support (MEC, GV/EJ and European Social Fund) is gratefully acknowledged (NMR, HRMS and X-ray analysis).

<sup>2</sup> E. Stahl, *Thin Layer Chromatography*, Springer-Verlag, Berlin, **1969**.

## Experimental Procedures and Characterizations

### General Procedure for the Preparation of the hydrazone **2**.

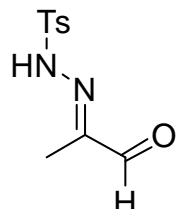

**(E)-4-methyl-N'-(1-oxopropan-2-ylidene)benzenesulfonohydrazide (2).** To a suspension of *p*-toluenesulfonyl hydrazide (5.0 g, 26.8 mmol) in ether (15 mL), a 40% methyl glyoxal solution in water (5.5 mL, 32.2 mmol) was added, followed by the addition of Na<sub>2</sub>SO<sub>4</sub> anhydre. The reaction mixture was vigorously stirred at room temperature for 18 h. Solids were removed by filtration and washed with ether. The filtrates were concentrated *in vacuo*. The crude was purified by FC (n-hexane/EtOAc gradient from 19:1 to 7:3) yielding the corresponding hydrazone **2** (955 mg, 3.97 mmol) in 15%. <sup>1</sup>H NMR (300 MHz, CDCl<sub>3</sub>) δ 9.33 (s, 1H), 9.08 (s, 1H), 7.87 (d, *J* = 8.2 Hz, 2H), 7.35 (d, *J* = 8.2 Hz, 2H), 2.44 (s, 3H), 1.87 (s, 3H). <sup>13</sup>C NMR (75 MHz, CDCl<sub>3</sub>) δ 190.4, 150.8, 145.1, 134.5, 129.9, 128.0, 21.6, 8.3. IR: 3220.5, 1696.1, 1338.4, 1166.7 cm<sup>-1</sup>. MS (EI) *m/z* (%): 214 (2), 197 (3), 184 (4), 155 (25), 139 (100), 123 (40), 108 (4), 91 (56), 77 (14), 65 (15), 51 (3). M.p. (*n*-hexane/EtOAc): 123-125 °C.

**General Procedure for the Preparation of 2,3-Dihydropyridazines **4**.** An ordinary vial equipped with a magnetic stirring bar was charged with catalyst **3b** (0.06 mmol, 20 mol%), PhCOOH (0.30 mmol) and toluene (6 mL). Then, the α,β-unsaturated aldehyde **1** (0.30 mmol) was added and the mixture was stirred for 10 minutes prior to the addition of hydrazone **2** (0.60 mmol). The stirring was maintained at room temperature until the reaction was complete (3-6 days). The reaction mixture was washed twice with a saturated solution of NaHCO<sub>3</sub>, dried over Na<sub>2</sub>SO<sub>4</sub> and concentrated *in vacuo*. The crude was charged onto silica gel and subjected to FC. The racemic standards for HPLC separation conditions were prepared using a mixture of (*R*) and (*S*) catalyst **3b** (0.06 mmol, 20 mol%).

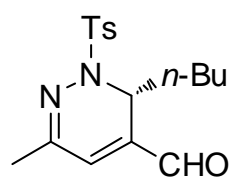

**(R)-3-butyl-6-methyl-2-(*p*-toluenesulfonyl)-2,3-dihydropyridazine-4-carbaldehyde (4a).** Following the general procedure **4a** (84 mg, 0.25 mmol) was isolated by FC (*n*-hexane/EtOAc gradient from 19:1 to 7:3) in 84% yield starting from aldehyde **1a** (41 μL, 0.30 mmol) and hydrazone **2** (144 mg, 0.60 mmol) in the presence of **3b** (36 mg, 0.06 mmol), PhCOOH (34 mg, 0.30 mmol) and using toluene (6 mL) as solvent. <sup>1</sup>H NMR (300 MHz, CDCl<sub>3</sub>) δ 9.55 (s, 1H), 7.77 (d, *J* = 8.3 Hz, 2H), 7.26 (d, *J* = 8.3 Hz, 2H), 6.37 (s, 1H), 5.45 (t, *J* = 6.4 Hz, 1H), 2.40 (s, 3H), 2.16 (s, 3H), 1.44–1.32 (m, 2H), 1.29–1.09 (m, 3H), 1.08–0.97 (m, 1H), 0.78 (t, *J* = 7.0 Hz, 3H). <sup>13</sup>C NMR (75 MHz, CDCl<sub>3</sub>) δ 190.1, 148.2, 144.0, 138.0, 136.3, 130.6, 129.5, 127.7, 49.3, 32.8, 26.0, 22.3, 21.6, 21.2, 13.8. IR: 1680.7, 1597.7, 1356.7, 1165.8 cm<sup>-1</sup>. MS (EI) *m/z* (%): 334 (M<sup>+</sup>, 20), 320 (2), 291 (7), 179 (100), 137.1 (76), 122 (8), 108 (14), 91 (25), 77 (12), 53 (6).

HRMS: Calculated for  $[C_{17}H_{23}N_2O_3S]^+$ : 335.1429  $[(M+H)^+]$ ; found: 335.1443. The ee was determined by HPLC using a Chiralpak AD-H column [*n*-hexane/*i*-PrOH (90:10)]; flow rate 1.0 mL/min;  $\tau_{\text{major}} = 12.64$  min,  $\tau_{\text{minor}} = 16.44$  min (97% ee).  $[\alpha]_D^{25}$ : -428.3 ( $c = 1.0$ ,  $CH_2Cl_2$ ).

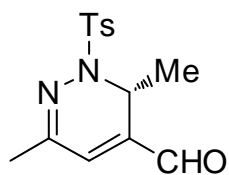

**(R)-3-methyl-6-methyl-2-(*p*-toluenesulfonyl)-2,3-dihydropyridazine-4-carbaldehyde (4b).** Following the general procedure **4b** (80 mg, 0.27 mmol) was isolated by FC (*n*-hexane/EtOAc gradient from 19:1 to 7:3) in 91% yield starting from aldehyde **1b** (29  $\mu$ L, 0.30 mmol) and hydrazone **2** (144 mg, 0.60 mmol) in the

presence of **3b** (36 mg, 0.06 mmol), PhCOOH (34 mg, 0.30 mmol) and using toluene (6 mL) as solvent.  $^1H$  NMR (300 MHz,  $CDCl_3$ )  $\delta$  9.55 (s, 1H), 7.84 (d,  $J = 8.4$  Hz, 2H), 7.29 (d,  $J = 8.4$  Hz, 2H), 6.40 (s, 1H), 5.45 (q,  $J = 6.5$  Hz, 1H), 2.41 (s, 3H), 2.18 (s, 3H), 0.97 (d,  $J = 6.5$  Hz, 3H).  $^{13}C$  NMR (75 MHz,  $CDCl_3$ )  $\delta$  189.7, 147.4, 144.2, 140.0, 136.4, 130.4, 129.6, 128.0, 45.4, 21.6, 21.2, 17.2. IR: 1679.7, 1596.8, 1354.8, 1165.8  $cm^{-1}$ . MS (EI)  $m/z$  (%): 292 ( $M^+$ , 20), 207 (3), 155 (2), 137 (100), 122 (2), 109 (16), 91 (14), 77 (7), 65 (9), 53 (5). HRMS: Calculated for  $[C_{14}H_{17}N_2O_3S]^+$ : 293.0960  $[(M+H)^+]$ ; found: 293.0972. The ee was determined by HPLC using a Chiralpak AD-H column [*n*-hexane/*i*-PrOH (90:10)]; flow rate 1.0 mL/min;  $\tau_{\text{major}} = 18.16$  min,  $\tau_{\text{minor}} = 23.38$  min (89% ee).  $[\alpha]_D^{25}$ : -274.7 ( $c = 1.0$ ,  $CH_2Cl_2$ ).

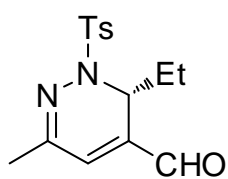

**(R)-3-ethyl-6-methyl-2-(*p*-toluenesulfonyl)-2,3-dihydropyridazine-4-carbaldehyde (4c).** Following the general procedure **4c** (68 mg, 0.22 mmol) was isolated by FC (*n*-hexane/EtOAc gradient from 19:1 to 7:3) in 74% yield starting from aldehyde **1c** (32  $\mu$ L, 0.30 mmol) and hydrazone **2** (144 mg, 0.60 mmol) in the

presence of **3b** (36 mg, 0.06 mmol), PhCOOH (34 mg, 0.30 mmol) and using toluene (6 mL) as solvent.  $^1H$  NMR (300 MHz,  $CDCl_3$ )  $\delta$  9.56 (s, 1H), 7.77 (d,  $J = 8.3$  Hz, 2H), 7.26 (d,  $J = 8.3$  Hz, 2H), 6.40 (s, 1H), 5.42 (t,  $J = 6.4$  Hz, 1H), 2.40 (s, 3H), 2.15 (s, 3H), 1.58–1.37 (m, 2H), 0.74 (t,  $J = 7.5$  Hz, 3H).  $^{13}C$  NMR (75 MHz,  $CDCl_3$ )  $\delta$  190.2, 147.9, 144.0, 137.6, 136.2, 130.8, 129.5, 127.7, 50.3, 26.3, 21.6, 21.1, 8.6. IR: 1680.7, 1597.6, 1357.6, 1166.7  $cm^{-1}$ . MS (EI)  $m/z$  (%): 306 ( $M^+$ , 16), 207 (2), 151 (100), 136 (5), 123 (9), 106 (12), 91 (21), 78 (11), 65 (13), 51 (5). HRMS: Calculated for  $[C_{15}H_{19}N_2O_3S]^+$ : 307.1116  $[(M+H)^+]$ ; found: 307.1103. The ee was determined by HPLC using a Chiralpak AD-H column [*n*-hexane/*i*-PrOH (90:10)]; flow rate 1.0 mL/min;  $\tau_{\text{major}} = 14.76$  min,  $\tau_{\text{minor}} = 21.22$  min (96% ee).  $[\alpha]_D^{25}$ : -391.7 ( $c = 1.0$ ,  $CH_2Cl_2$ ).

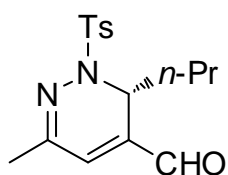

**(R)-6-methyl-3-propyl-2-(*p*-toluenesulfonyl)-2,3-dihydropyridazine-4-carbaldehyde (4d).** Following the general procedure **4d** (69 mg, 0.22 mmol) was isolated by FC (*n*-hexane/EtOAc gradient from 19:1 to 7:3) in 72% yield starting from

aldehyde **1d** (36  $\mu$ L, 0.30 mmol) and hydrazone **2** (144 mg, 0.60 mmol) in the presence of **3b** (36 mg, 0.06 mmol), PhCOOH (34 mg, 0.30 mmol) and using toluene (6 mL) as solvent.  $^1\text{H}$  NMR (300 MHz,  $\text{CDCl}_3$ )  $\delta$  9.55 (s, 1H), 7.77 (d,  $J = 8.2$  Hz, 2H), 7.26 (d,  $J = 8.2$  Hz, 2H), 6.37 (s, 1H), 5.46 (t,  $J = 6.4$  Hz, 1H), 2.40 (s, 3H), 2.16 (s, 3H), 1.44–1.36 (m, 2H), 1.34–1.19 (m, 1H), 1.19–1.01 (m, 1H), 0.80 (t,  $J = 7.2$  Hz, 3H).  $^{13}\text{C}$  NMR (75 MHz,  $\text{CDCl}_3$ )  $\delta$  190.1, 148.2, 144.0, 138.0, 136.2, 130.6, 129.5, 127.7, 49.1, 35.3, 21.6, 21.2, 17.3, 13.7. IR: 1681.6, 1597.5, 1355.7, 1167.7  $\text{cm}^{-1}$ . MS (EI)  $m/z$  (%): 320 ( $\text{M}^+$ , 21), 291 (6), 207 (8), 165 (100), 151 (3), 137 (25), 122 (11), 108 (14), 91 (26), 65 (14), 51 (6). HRMS: Calculated for  $[\text{C}_{16}\text{H}_{21}\text{N}_2\text{O}_3\text{S}]^+$ : 321.1273  $[(\text{M}+\text{H})^+]$ ; found: 321.1286. The ee was determined by HPLC using a Chiralpak AD-H column [*n*-hexane/*i*-PrOH (90:10)]; flow rate 1.0 mL/min;  $\tau_{\text{major}} = 12.87$  min,  $\tau_{\text{minor}} = 17.57$  min (96% ee).  $[\alpha]_{\text{D}}^{25}$ : -359.5 ( $c = 1.0$ ,  $\text{CH}_2\text{Cl}_2$ ).

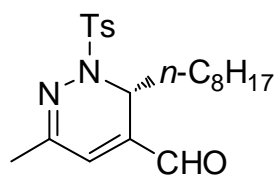

**(R)-6-methyl-3-octyl-2-(*p*-toluenesulfonyl)-2,3-dihydropyridazine-4-carbaldehyde (4e).** Following the general procedure **4e** (74 mg, 0.19 mmol) was isolated by FC (*n*-hexane/EtOAc gradient from 19:1 to 7:3) in 63% yield starting from aldehyde **1e** (60  $\mu$ L, 0.30 mmol) and hydrazone **2** (144 mg, 0.60 mmol) in

the presence of **3b** (36 mg, 0.06 mmol), PhCOOH (34 mg, 0.30 mmol) and using toluene (6 mL) as solvent.  $^1\text{H}$  NMR (300 MHz,  $\text{CDCl}_3$ )  $\delta$  9.56 (s, 1H), 7.77 (d,  $J = 8.3$  Hz, 2H), 7.27 (d,  $J = 8.3$  Hz, 2H), 6.37 (s, 1H), 5.44 (t,  $J = 6.4$  Hz, 1H), 2.40 (s, 3H), 2.16 (s, 3H), 1.48–1.07 (m, 14H), 0.86 (t,  $J = 7.3$  Hz, 3H).  $^{13}\text{C}$  NMR (75 MHz,  $\text{CDCl}_3$ )  $\delta$  190.1, 148.2, 144.0, 138.0, 136.3, 130.6, 129.5, 127.7, 49.3, 33.1, 31.8, 29.3, 29.3, 29.2, 23.9, 22.6, 21.6, 21.2, 14.1. IR: 1681.6, 1596.5, 1358.6, 1167.7  $\text{cm}^{-1}$ . MS (EI)  $m/z$  (%): 390 ( $\text{M}^+$ , 14), 291 (7), 235 (100), 207 (12), 137 (45), 109 (10), 91 (15), 65 (6). HRMS: Calculated for  $[\text{C}_{21}\text{H}_{31}\text{N}_2\text{O}_3\text{S}]^+$ : 391.2055  $[(\text{M}+\text{H})^+]$ ; found: 391.2056. The ee was determined by HPLC using a Chiralpak AD-H column [*n*-hexane/*i*-PrOH (90:10)]; flow rate 1.0 mL/min;  $\tau_{\text{major}} = 9.22$  min,  $\tau_{\text{minor}} = 10.83$  min (97% ee).  $[\alpha]_{\text{D}}^{25}$ : -274.0 ( $c = 1.0$ ,  $\text{CH}_2\text{Cl}_2$ ).

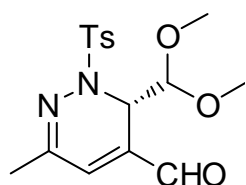

**(S)-3-dimethoxymethyl-6-methyl-2-(*p*-toluenesulfonyl)-2,3-dihydropyridazine-4-carbaldehyde (4f).** Following the general procedure **4f** (64 mg, 0.18 mmol) was isolated by FC (*n*-hexane/EtOAc gradient from 19:1 to 7:3) in 61% yield starting from aldehyde **1f** (38  $\mu$ L, 0.30 mmol) and hydrazone **2** (144 mg, 0.60 mmol) in the

presence of **3b** (36 mg, 0.06 mmol), PhCOOH (34 mg, 0.30 mmol) and using toluene (6 mL) as solvent.  $^1\text{H}$  NMR (300 MHz,  $\text{CDCl}_3$ )  $\delta$  9.57 (s, 1H), 7.80 (d,  $J = 8.3$  Hz, 2H), 7.27 (d,  $J = 8.3$  Hz, 2H), 6.48 (s, 1H), 5.59 (d,  $J = 5.0$  Hz, 1H), 4.15 (d,  $J = 5.0$  Hz, 1H), 3.31 (s, 3H), 3.25 (s, 3H), 2.40 (s, 3H), 2.15 (s, 3H).  $^{13}\text{C}$  NMR (75 MHz,  $\text{CDCl}_3$ )  $\delta$  189.7, 147.9, 144.1, 136.0, 133.4, 130.5, 129.4, 127.9, 104.0, 56.0, 55.1, 49.1, 21.6, 21.2. IR: 1685.5, 1353.8, 1168.7, 1119.5  $\text{cm}^{-1}$ . MS (EI)  $m/z$  (%): 278 (14), 214 (6), 185 (9), 171 (4), 155 (8), 139 (2), 123 (100), 106 (6), 91 (31), 79 (5), 65 (16), 51 (4). HRMS: Calculated for

$[\text{C}_{16}\text{H}_{21}\text{N}_2\text{O}_5\text{S}]^+$ : 353.1171  $[(\text{M}+\text{H})^+]$ ; found: 353.1176. The ee was determined by HPLC using a Chiralpak AD-H column [*n*-hexane/*i*-PrOH (90:10)]; flow rate 1.0 mL/min;  $\tau_{\text{major}} = 17.42$  min,  $\tau_{\text{minor}} = 21.97$  min (97% ee).  $[\alpha]_{\text{D}}^{25}$ : -545.1 ( $c = 1.0$ ,  $\text{CH}_2\text{Cl}_2$ ).

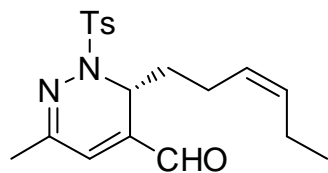

**(*R,Z*)-3-(hex-3-en-1-yl)-6-methyl-2-(*p*-toluenesulfonyl)-2,3-dihydropyridazine-4-carbaldehyde (4g).** Following the general procedure **4g**

(74 mg, 0.21 mmol) was isolated by FC (*n*-hexane/EtOAc gradient from 19:1 to 7:3) in 68% yield starting from aldehyde **1g** (45  $\mu\text{L}$ , 0.30 mmol) and hydrazone **2** (144 mg, 0.60 mmol) in the presence of **3b** (36 mg, 0.06 mmol), PhCOOH (34 mg, 0.30 mmol) and using toluene (6 mL) as solvent.  $^1\text{H}$  NMR (300 MHz,  $\text{CDCl}_3$ )  $\delta$  9.55 (s, 1H), 7.77 (d,  $J = 8.3$  Hz, 2H), 7.26 (d,  $J = 8.3$  Hz, 2H), 6.39 (s, 1H), 5.48 (t,  $J = 6.4$  Hz, 1H), 5.37–5.26 (m, 1H), 5.19–5.07 (m, 1H), 2.40 (s, 3H), 2.17 (s, 3H), 2.03–1.79 (m, 4H), 1.49–1.39 (m, 2H), 0.91 (t,  $J = 7.5$  Hz, 3H).  $^{13}\text{C}$  NMR (75 MHz,  $\text{CDCl}_3$ )  $\delta$  190.0, 148.4, 144.1, 137.8, 136.2, 132.8, 130.6, 129.5, 127.7, 127.1, 49.1, 33.2, 22.0, 21.6, 21.2, 20.5, 14.2. IR: 1681.6, 1595.8, 1353.6, 1166.7  $\text{cm}^{-1}$ . MS (EI)  $m/z$  (%): 360 ( $\text{M}^+$ , 2), 291 (100), 226 (1), 205 (92), 155 (3), 135 (52), 106 (46), 91 (25), 65 (13). HRMS: Calculated for  $[\text{C}_{19}\text{H}_{25}\text{N}_2\text{O}_3\text{S}]^+$ : 361.1586  $[(\text{M}+\text{H})^+]$ ; found: 361.1601. The ee was determined by HPLC using a Chiralpak AD-H column [*n*-hexane/*i*-PrOH (93:7)]; flow rate 1.0 mL/min;  $\tau_{\text{major}} = 16.54$  min,  $\tau_{\text{minor}} = 21.86$  min (97% ee).  $[\alpha]_{\text{D}}^{25}$ : -236.3 ( $c = 1.0$ ,  $\text{CH}_2\text{Cl}_2$ ).

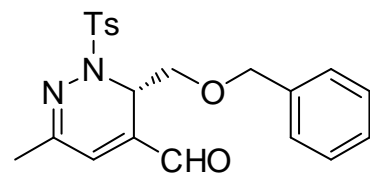

**(*S*)-3-[(benzyloxy)methyl]-6-methyl-2-(*p*-toluenesulfonyl)-2,3-dihydropyridazine-4-carbaldehyde (4h).** Following the general

procedure **4h** (82 mg, 0.21mmol) was isolated by FC (*n*-hexane/EtOAc gradient from 19:1 to 7:3) in 69% yield starting from aldehyde **1h** (53 mg, 0.30 mmol) and hydrazone **2** (144 mg, 0.60 mmol) in the presence of **3b** (36 mg, 0.06 mmol), PhCOOH (34 mg, 0.30 mmol) and using toluene (6 mL) as solvent.  $^1\text{H}$  NMR (300 MHz,  $\text{CDCl}_3$ )  $\delta$  9.55 (s, 1H), 7.83 (d,  $J = 8.3$  Hz, 2H), 7.40–7.17 (m, 5H), 7.14–7.07 (m, 2H), 6.47 (s, 1H), 5.63 (t,  $J = 4.4$  Hz, 1H), 4.33–4.18 (m, 2H), 3.48–3.31 (m, 2H), 2.37 (s, 3H), 2.11 (s, 3H).  $^{13}\text{C}$  NMR (75 MHz,  $\text{CDCl}_3$ )  $\delta$  189.8, 147.0, 144.1, 137.6, 136.2, 135.3, 132.1, 129.4, 128.2, 128.0, 127.5, 127.3, 73.0, 69.9, 48.8, 21.6, 21.1. IR: 1679.7, 1595.8, 1353.8, 1165.8, 1090.6  $\text{cm}^{-1}$ . MS (EI)  $m/z$  (%): 398 ( $\text{M}^+$ , 2), 355 (4), 281 (4), 241 (5), 207 (18), 171 (4), 121 (4), 107 (63), 91 (100), 77 (90), 65 (14), 51 (25). HRMS: Calculated for  $[\text{C}_{21}\text{H}_{23}\text{N}_2\text{O}_4\text{S}]^+$ : 399.1379  $[(\text{M}+\text{H})^+]$ ; found: 399.1375. The ee was determined by HPLC using a Chiralpak IC column [*n*-hexane/*i*-PrOH (85:15)]; flow rate 1.0 mL/min;  $\tau_{\text{major}} = 73.07$  min,  $\tau_{\text{minor}} = 62.73$  min (96% ee).  $[\alpha]_{\text{D}}^{25}$ : -103.8 ( $c = 1.0$ ,  $\text{CH}_2\text{Cl}_2$ ).

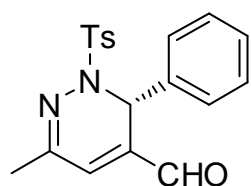

**(R)-6-methyl-3-phenyl-2-(*p*-toluenesulfonyl)-2,3-dihydropyridazine-4-carbaldehyde (4i).** Following the general procedure **4i** (52 mg, 0.15 mmol) was isolated by FC (*n*-hexane/EtOAc gradient from 19:1 to 7:3) in 49% yield starting

from aldehyde **1i** (76  $\mu$ L, 0.60 mmol) and hydrazone **2** (72 mg, 0.30 mmol) in the presence of **3b** (36 mg, 0.06 mmol), PhCOOH (34 mg, 0.30 mmol) and using toluene (6 mL) as solvent.  $^1\text{H}$  NMR (300 MHz,  $\text{CDCl}_3$ )  $\delta$  9.55 (s, 1H), 7.40 (d,  $J = 8.2$  Hz, 2H), 7.23–7.14 (m, 1H), 7.14–7.08 (m, 4H), 7.03 (d,  $J = 8.2$  Hz, 2H), 6.51 (s, 1H), 6.43 (s, 1H), 2.33 (s, 3H), 2.22 (s, 3H).  $^{13}\text{C}$  NMR (75 MHz,  $\text{CDCl}_3$ )  $\delta$  189.7, 145.7, 143.7, 138.3, 137.9, 135.6, 129.9, 128.9, 128.7, 128.5, 127.9, 127.3, 52.8, 21.5, 21.2. IR: 1688.4, 1599.7, 1359.6, 1168.7  $\text{cm}^{-1}$ . MS (EI)  $m/z$  (%): 354 ( $\text{M}^+$ , 100), 327 (2), 281 (3), 226 (1), 199 (53), 171 (60), 155 (30), 144 (11), 115 (24), 91 (32), 65 (16). HRMS: Calculated for  $[\text{C}_{19}\text{H}_{19}\text{N}_2\text{O}_3\text{S}]^+$ : 355.1116 [ $(\text{M}+\text{H})^+$ ]; found: 355.1117. The ee was determined by HPLC using a Chiralpak IC column [*n*-hexane/*i*-PrOH (80:20)]; flow rate 1.0 mL/min;  $\tau_{\text{major}} = 84.87$  min,  $\tau_{\text{minor}} = 45.38$  min (89% ee).  $[\alpha]_{\text{D}}^{25}$ : -33.3 ( $c = 1.0$ ,  $\text{CH}_2\text{Cl}_2$ ).

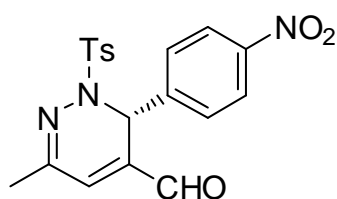

**(R)-6-methyl-3-(4-nitrophenyl)-2-(*p*-toluenesulfonyl)-2,3-dihydropyridazine-4-carbaldehyde (4j).** Following the general procedure **4j**

(62 mg, 0.16 mmol) was isolated by FC (*n*-hexane/EtOAc gradient from 19:1 to 7:3) in 52% yield starting from aldehyde **1j** (108 mg, 0.60 mmol) and hydrazone **2** (72 mg, 0.30 mmol) in the presence of **3b** (36 mg, 0.06 mmol), PhCOOH (34 mg, 0.30 mmol) and using toluene (6 mL) as solvent.  $^1\text{H}$  NMR (300 MHz,  $\text{CDCl}_3$ )  $\delta$  9.55 (s, 1H), 7.95 (d,  $J = 8.1$  Hz, 2H), 7.50 (d,  $J = 8.4$  Hz, 2H), 7.29 (d,  $J = 8.4$  Hz, 2H), 7.10 (d,  $J = 8.1$  Hz, 2H), 6.57 (s, 1H), 6.54 (s, 1H), 2.36 (s, 3H), 2.25 (s, 3H).  $^{13}\text{C}$  NMR (75 MHz,  $\text{CDCl}_3$ )  $\delta$  189.5, 147.8, 146.0, 144.7, 144.6, 137.2, 135.3, 130.6, 129.3, 128.0, 127.8, 123.7, 51.2, 21.5, 21.2. IR: 1681.6, 1597.7, 1521.6, 1346.1, 1303.6, 1166.7  $\text{cm}^{-1}$ . MS (EI)  $m/z$  (%): 399 ( $\text{M}^+$ , 100), 327 (2), 281 (14), 253 (9), 241 (70), 227 (77), 198 (66), 171 (60), 169 (37), 139 (16), 115 (21), 91 (69), 65 (21). HRMS: Calculated for  $[\text{C}_{19}\text{H}_{18}\text{N}_3\text{O}_5\text{S}]^+$ : 400.0967 [ $(\text{M}+\text{H})^+$ ]; found: 400.0984. The ee was determined by HPLC using a Chiralpak IC column [*n*-hexane/*i*-PrOH (80:20)]; flow rate 1.0 mL/min;  $\tau_{\text{major}} = 103.45$  min,  $\tau_{\text{minor}} = 60.82$  min (95% ee).  $[\alpha]_{\text{D}}^{25}$ : -96.7 ( $c = 1.0$ ,  $\text{CH}_2\text{Cl}_2$ ).

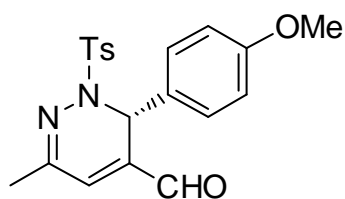

**(R)-3-(4-methoxyphenyl)-6-methyl-2-(*p*-toluenesulfonyl)-2,3-dihydropyridazine-4-carbaldehyde (4k).** Following the general procedure

**4k** (69 mg, 0.18 mmol) was isolated by FC (*n*-hexane/EtOAc gradient from 19:1 to 7:3) in 60% yield starting from aldehyde **1k** (98 mg, 0.60 mmol) and hydrazone **2** (72 mg, 0.30 mmol) in the presence of **3b** (36 mg, 0.06 mmol), PhCOOH (34 mg, 0.30 mmol) and using toluene (6 mL) as solvent.  $^1\text{H}$  NMR (300 MHz,  $\text{CDCl}_3$ )  $\delta$  9.53 (s, 1H), 7.41 (d,  $J = 8.3$

Hz, 2H), 7.04 (d,  $J = 8.4$  Hz, 4H), 6.61 (d,  $J = 8.7$  Hz, 2H), 6.51 (s, 1H), 6.34 (s, 1H), 3.74 (s, 3H), 2.33 (s, 3H), 2.19 (s, 3H).  $^{13}\text{C}$  NMR (75 MHz,  $\text{CDCl}_3$ )  $\delta$  189.8, 160.0, 145.5, 143.5, 138.5, 135.7, 130.2, 129.6, 128.8, 128.8, 127.9, 113.7, 55.3, 52.4, 21.5, 21.2. IR: 1682.6, 1608.3, 1354.8, 1168.7, 1085.7  $\text{cm}^{-1}$ . MS (EI)  $m/z$  (%): 384 ( $\text{M}^+$ , 100), 327 (2), 281 (6), 253 (5), 229 (50), 201 (44), 171 (15), 169 (37), 128 (11), 91 (35), 65 (14). HRMS: Calculated for  $[\text{C}_{20}\text{H}_{21}\text{N}_2\text{O}_4\text{S}]^+$ : 385.1222  $[(\text{M}+\text{H})^+]$ ; found: 385.1237. The ee was determined by HPLC using a Chiralpak IC column [ $n$ -hexane/ $i$ -PrOH (80:20)]; flow rate 1.0 mL/min;  $\tau_{\text{major}} = 133.94$  min,  $\tau_{\text{minor}} = 77.78$  min (85% ee).  $[\alpha]_{\text{D}}^{25}$ : +21.4 ( $c = 1.0$ ,  $\text{CH}_2\text{Cl}_2$ ).

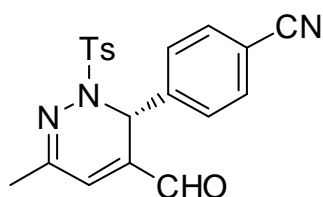

**(R)-3-(4-cyanophenyl)-6-methyl-2-(*p*-toluenesulfonyl)-2,3-dihydropyridazine-4-carbaldehyde (4l).** Following the general procedure **4l** (82 mg, 0.22 mmol) was isolated by FC ( $n$ -hexane/EtOAc gradient from 19:1 to 1:1) in 72% yield starting from aldehyde **1l** (94 mg, 0.60 mmol) and hydrazone **2** (72 mg, 0.30 mmol) in the presence of **3b** (36 mg, 0.06 mmol), PhCOOH (34 mg, 0.30 mmol) and using toluene (6 mL) as solvent.  $^1\text{H}$  NMR (300 MHz,  $\text{CDCl}_3$ )  $\delta$  9.55 (s, 1H), 7.48 (d,  $J = 8.3$  Hz, 2H), 7.40 (d,  $J = 8.4$  Hz, 2H), 7.24 (d,  $J = 8.4$ , 2H), 7.11 (d,  $J = 8.3$  Hz, 2H), 6.55 (s, 1H), 6.48 (s, 1H), 2.38 (s, 3H), 2.22 (s, 3H).  $^{13}\text{C}$  NMR (75 MHz,  $\text{CDCl}_3$ )  $\delta$  189.5, 145.9, 144.4, 142.8, 137.2, 135.3, 132.3, 130.5, 129.2, 127.8, 127.8, 118.2, 112.4, 52.2, 21.6, 21.2. IR: 2228.3, 1677.8, 1595.8, 1357.6, 1165.8  $\text{cm}^{-1}$ . MS (EI)  $m/z$  (%): 379 ( $\text{M}^+$ , 100), 281 (2), 224 (59), 196 (59), 155 (20), 127 (16), 91 (55), 65 (19). HRMS: Calculated for  $[\text{C}_{20}\text{H}_{18}\text{N}_3\text{O}_3\text{S}]^+$ : 380.1069  $[(\text{M}+\text{H})^+]$ ; found: 380.1063. The ee was determined by HPLC using a Chiralpak IC column [ $n$ -hexane/ $i$ -PrOH (80:20)]; flow rate 1.0 mL/min;  $\tau_{\text{major}} = 148.17$  min,  $\tau_{\text{minor}} = 81.53$  min (94% ee).  $[\alpha]_{\text{D}}^{25}$ : -48.3 ( $c = 1.0$ ,  $\text{CH}_2\text{Cl}_2$ ).

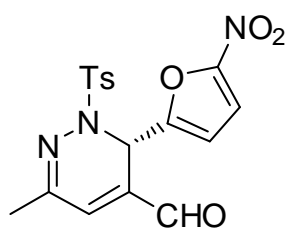

**(S)-6-methyl-3-(5-nitrofuran-2-yl)-2-(*p*-toluenesulfonyl)-2,3-dihydropyridazine-4-carbaldehyde (4m).** Following the general procedure **4m** (64 mg, 0.16 mmol) was isolated by FC ( $n$ -hexane/EtOAc gradient from 19:1 to 1:1) in 55% yield starting from aldehyde **1m** (94 mg, 0.60 mmol) and hydrazone **2** (72 mg, 0.30 mmol) in the presence of **3b** (36 mg, 0.06 mmol), PhCOOH (34 mg, 0.30 mmol) and using toluene (6 mL) as solvent.  $^1\text{H}$  NMR (300 MHz,  $\text{CDCl}_3$ )  $\delta$  9.61 (s, 1H), 7.65 (d,  $J = 8.2$  Hz, 2H), 7.15 (d,  $J = 8.2$  Hz, 2H), 7.00 (d,  $J = 3.6$  Hz, 1H), 6.70 (s, 1H), 6.50-6.46 (m, 2H), 2.34 (s, 3H), 2.29 (s, 3H).  $^{13}\text{C}$  NMR (75 MHz,  $\text{CDCl}_3$ )  $\delta$  188.6, 151.7, 151.6, 146.6, 144.7, 134.4, 134.0, 131.8, 129.1, 127.9, 112.4, 111.3, 45.2, 21.5, 21.2. IR: 1681.6, 1532.2, 1501.3, 1348.0, 1310.4, 1161.9  $\text{cm}^{-1}$ . MS (EI)  $m/z$  (%): 389 ( $\text{M}^+$ , 100), 234 (30), 188 (56), 155 (19), 132 (39), 91 (76), 65 (18). HRMS: Calculated for  $[\text{C}_{17}\text{H}_{16}\text{N}_3\text{O}_6\text{S}]^+$ : 390.0760  $[(\text{M}+\text{H})^+]$ ; found: 390.0757. The ee was determined by HPLC using a Chiralpak AD-H column [ $n$ -hexane/ $i$ -PrOH (90:10)]; flow rate 1.0 mL/min;  $\tau_{\text{major}} = 76.54$  min,  $\tau_{\text{minor}} = 59.32$  min (90% ee).  $[\alpha]_{\text{D}}^{25}$ : +19.9 ( $c = 1.0$ ,  $\text{CH}_2\text{Cl}_2$ ).



### Determination of the absolute configuration.

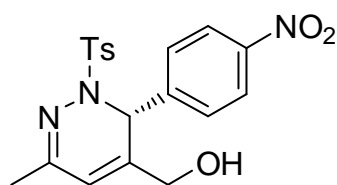

**(R)-[6-methyl-3-(4-nitrophenyl)-2-(*p*-toluenesulfonyl)-2,3-dihydropyridazin-4-yl]methanol (5j).** To a solution of the dihydropyridazine **4j** (42 mg, 0.10 mmol) in methanol (3 mL), NaBH<sub>4</sub> (~50 mg) was added at 0 °C. The reaction mixture was stirred at this temperature for 20 minutes prior to the addition of a saturated solution of aqueous NH<sub>4</sub>Cl (3 mL) and CH<sub>2</sub>Cl<sub>2</sub> (5 mL) and then stirred at room temperature 30 minutes more. The mixture was extracted with CH<sub>2</sub>Cl<sub>2</sub> (3 x 10 mL) and the collected organic fractions were dried over Na<sub>2</sub>SO<sub>4</sub>, filtered and the solvents were removed under reduced pressure. The crude was purified by FC (*n*-hexane/EtOAc 1:1) yielding the corresponding alcohol **5j** (32 mg, 0.08 mmol) in 76%. <sup>1</sup>H NMR (300 MHz, CDCl<sub>3</sub>) δ 7.96 (d, *J* = 8.7 Hz, 2H), 7.42 (d, *J* = 8.3 Hz, 2H), 7.30 (d, *J* = 8.7 Hz, 2H), 7.01 (d, *J* = 8.3 Hz, 2H), 6.04 (s, 1H), 5.93 (s, 1H), 4.19–4.01 (m, 2H), 2.32 (s, 3H), 2.13 (s, 3H). <sup>13</sup>C NMR (75 MHz, CDCl<sub>3</sub>) δ 148.4, 147.9, 144.2, 143.9, 143.6, 135.6, 128.9, 128.5, 127.6, 123.6, 114.0, 62.1, 55.0, 21.7, 21.4. IR: 3418.2, 1596.8, 1520.6, 1343.2, 1304.5, 1161.9 cm<sup>-1</sup>. MS (EI) *m/z* (%): 401 (M<sup>+</sup>, 2), 385 (49), 355 (12), 281 (11), 253 (20), 230 (72), 207 (90), 184 (100), 171 (19), 139 (22), 115 (19), 91 (91), 65 (22). HRMS: Calculated for [C<sub>19</sub>H<sub>20</sub>N<sub>3</sub>O<sub>5</sub>S]<sup>+</sup>: 402.1124[(M+H)<sup>+</sup>]; found: 402.1139. M.p. (*n*-hexane/EtOAc): 188–190 °C. The ee was determined by HPLC using a Chiralpak AD-H column [*n*-hexane/*i*-PrOH (90:10)]; flow rate 1.0 mL/min; τ<sub>major</sub> = 70.74 min, τ<sub>minor</sub> = 112.60 min (93 % ee). [α]<sub>D</sub><sup>25</sup>: -47.5 (*c* = 1.0, CH<sub>2</sub>Cl<sub>2</sub>).

The absolute configuration of the dihydropyridazine **5j** was determined by single-crystal X-ray analysis. The same stereochemistry was assumed for assigning the configuration of the rest of the compounds.

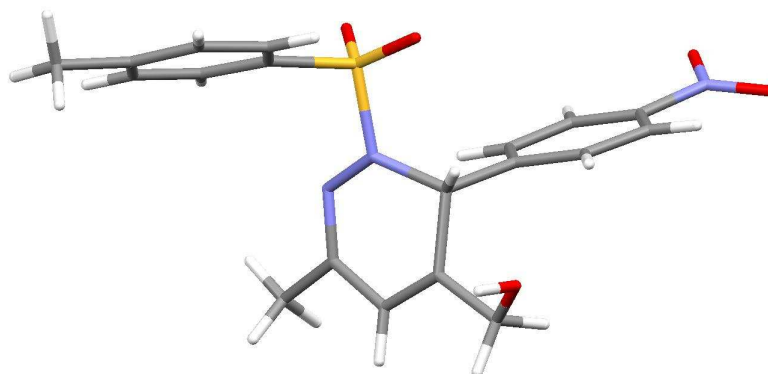

Figure S1: X-ray determined crystal structure.

## NMR spectra of compound 2

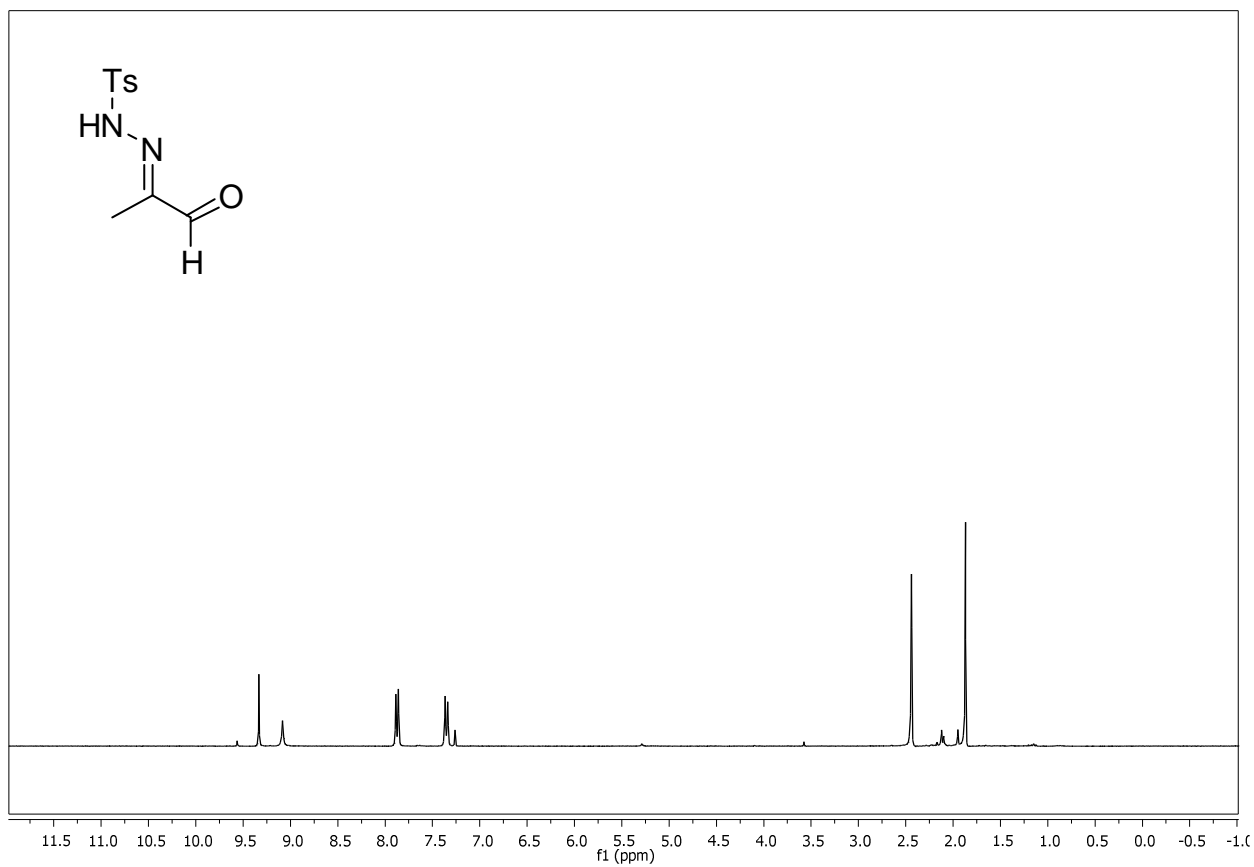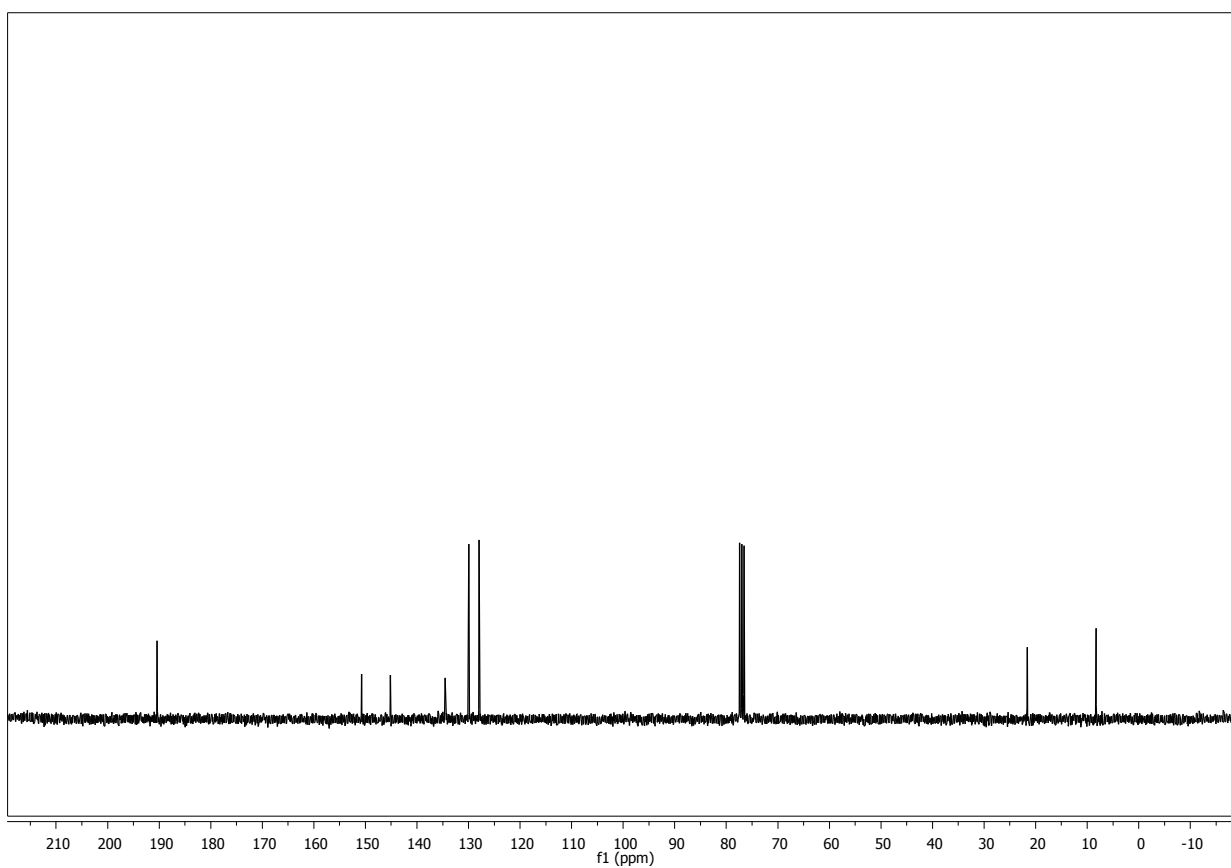

Figure S2: NMR spectra of compound 2.

### NMR spectra of compounds 4a-q

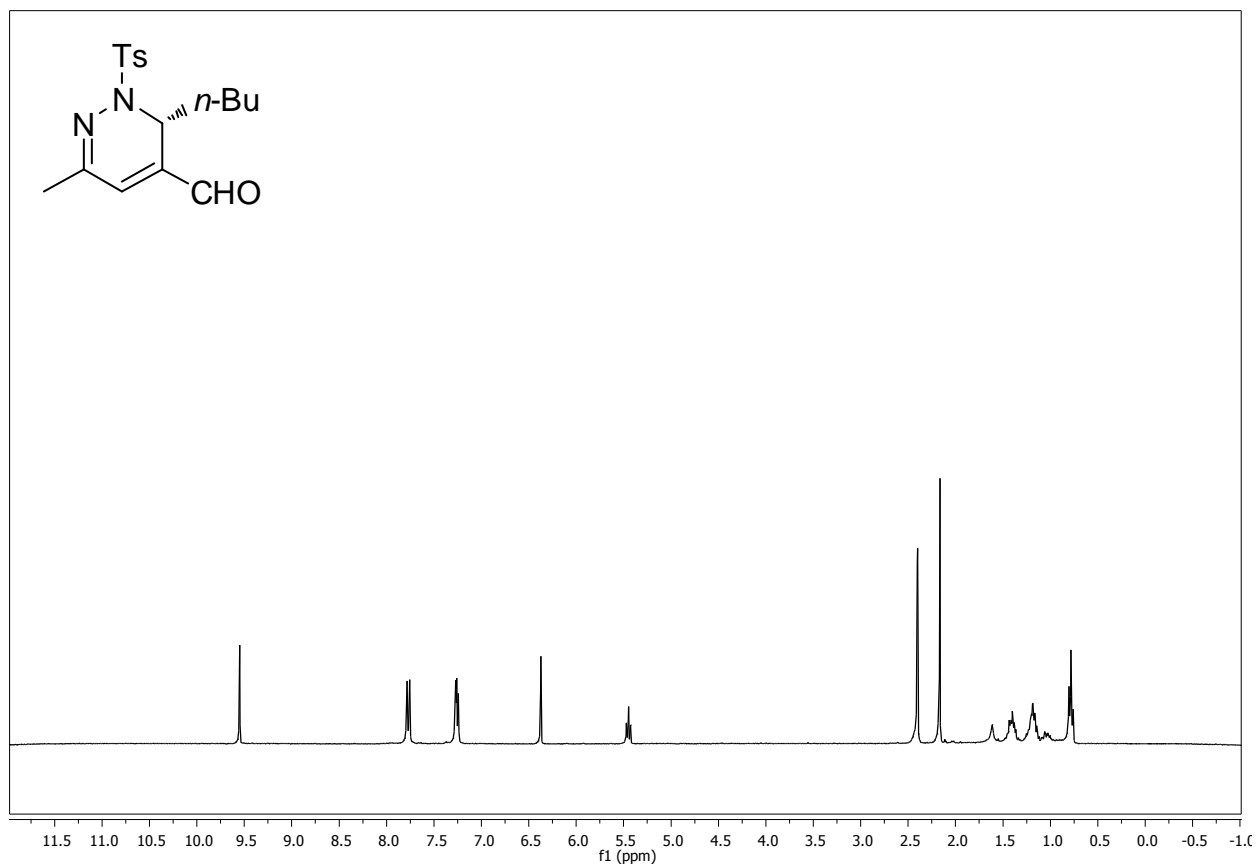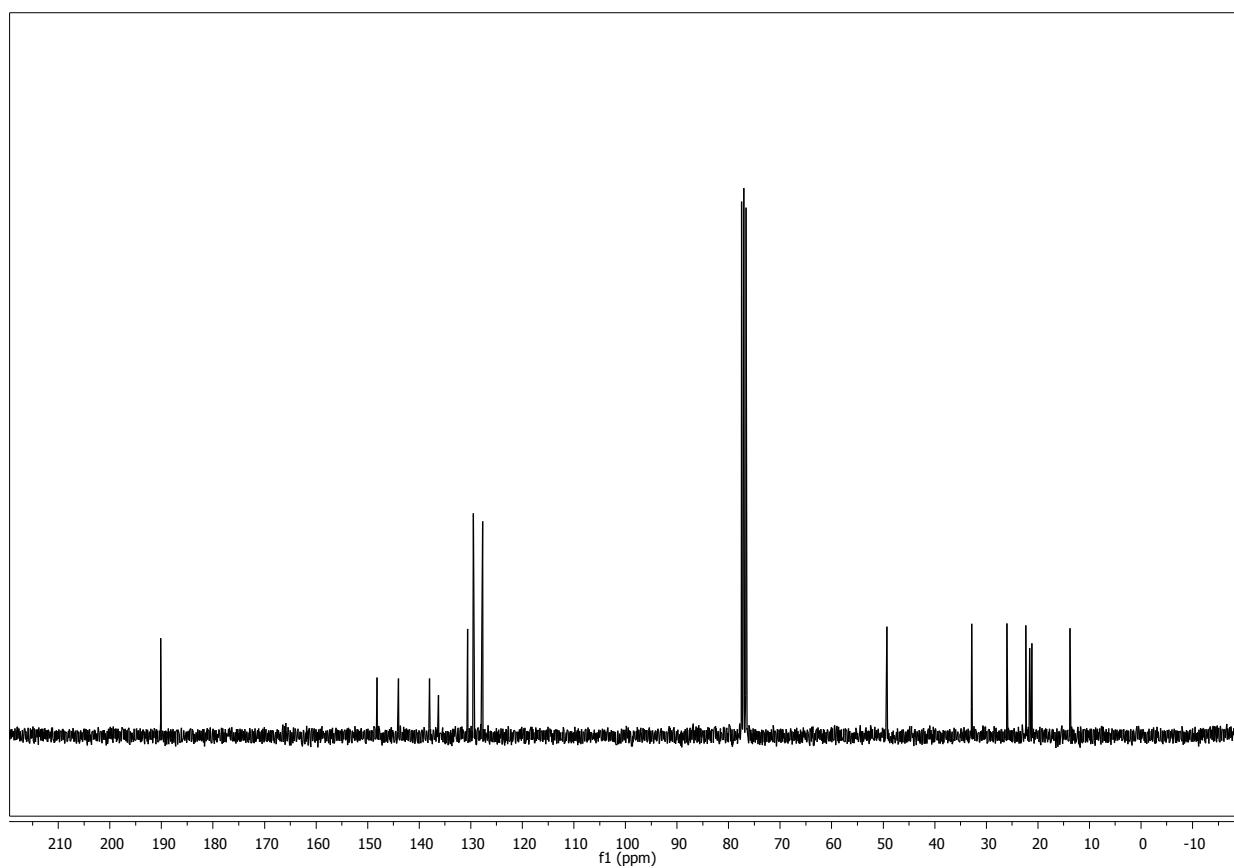

Figure S3: NMR spectra of compound 4a.

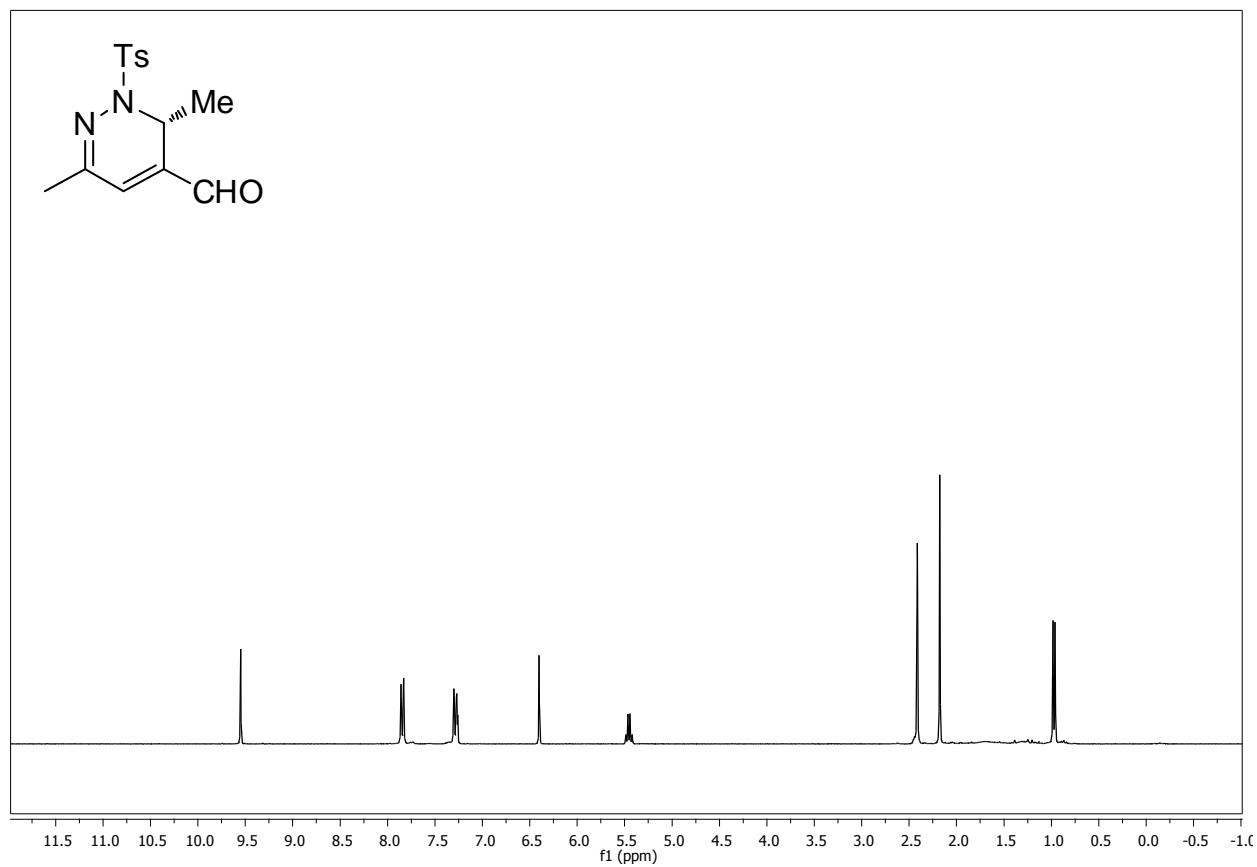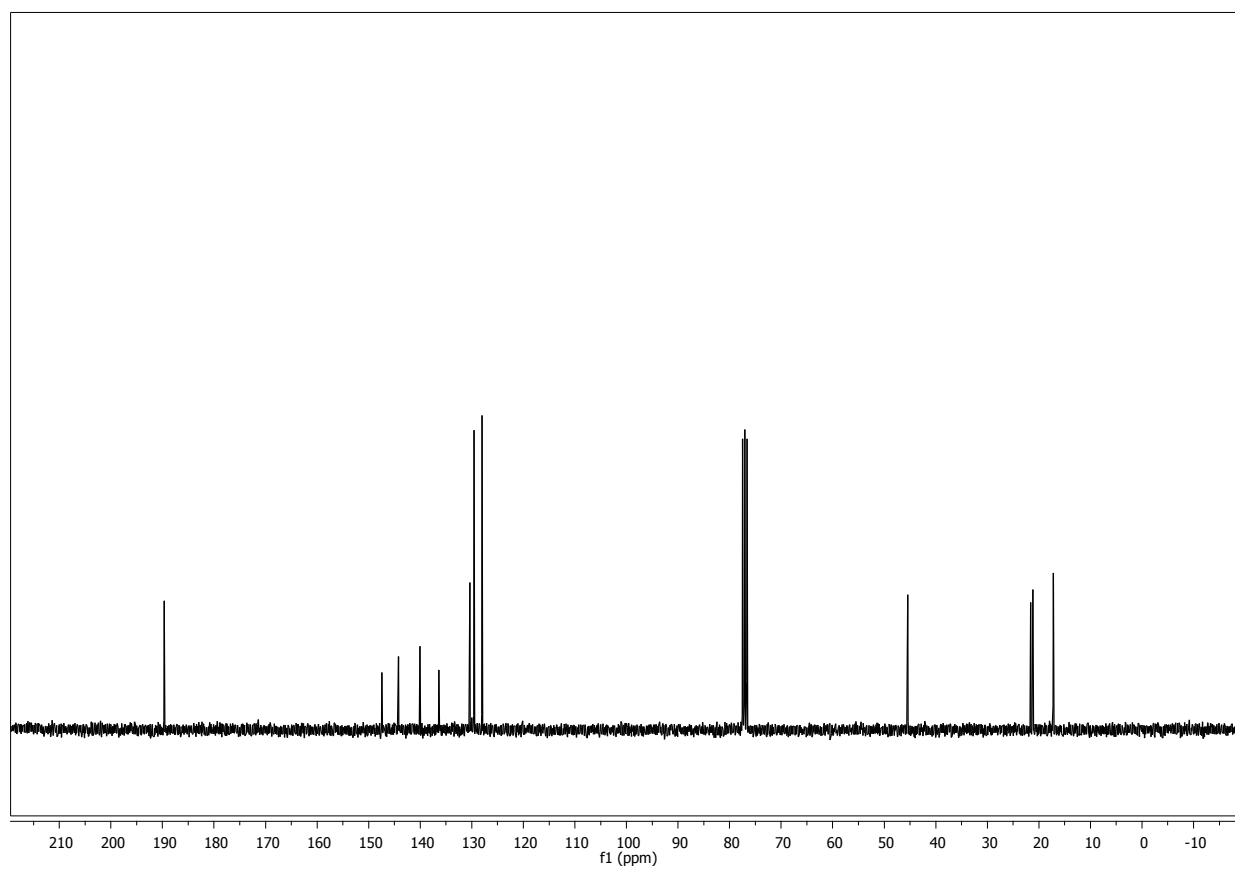

Figure S4: NMR spectra of compound **4b**.

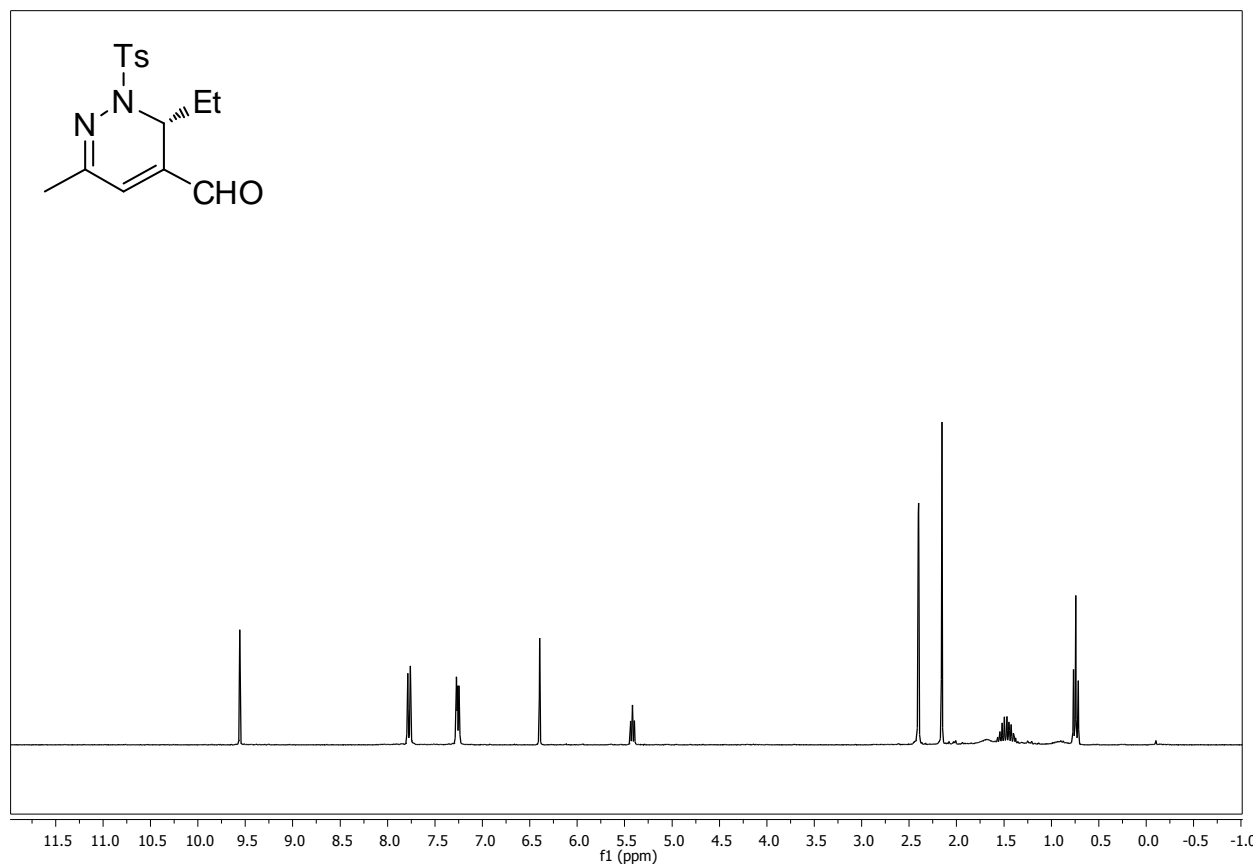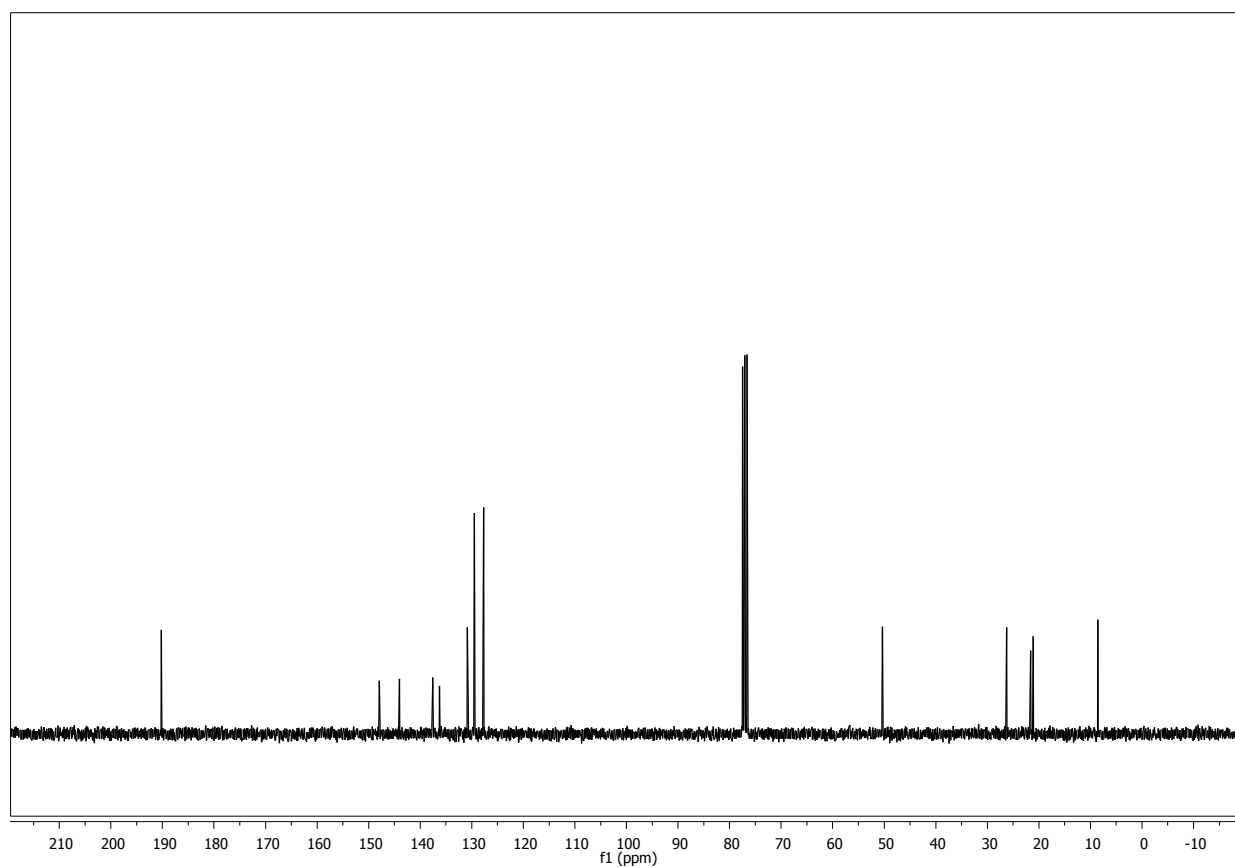

Figure S5: NMR spectra of compound 4c.

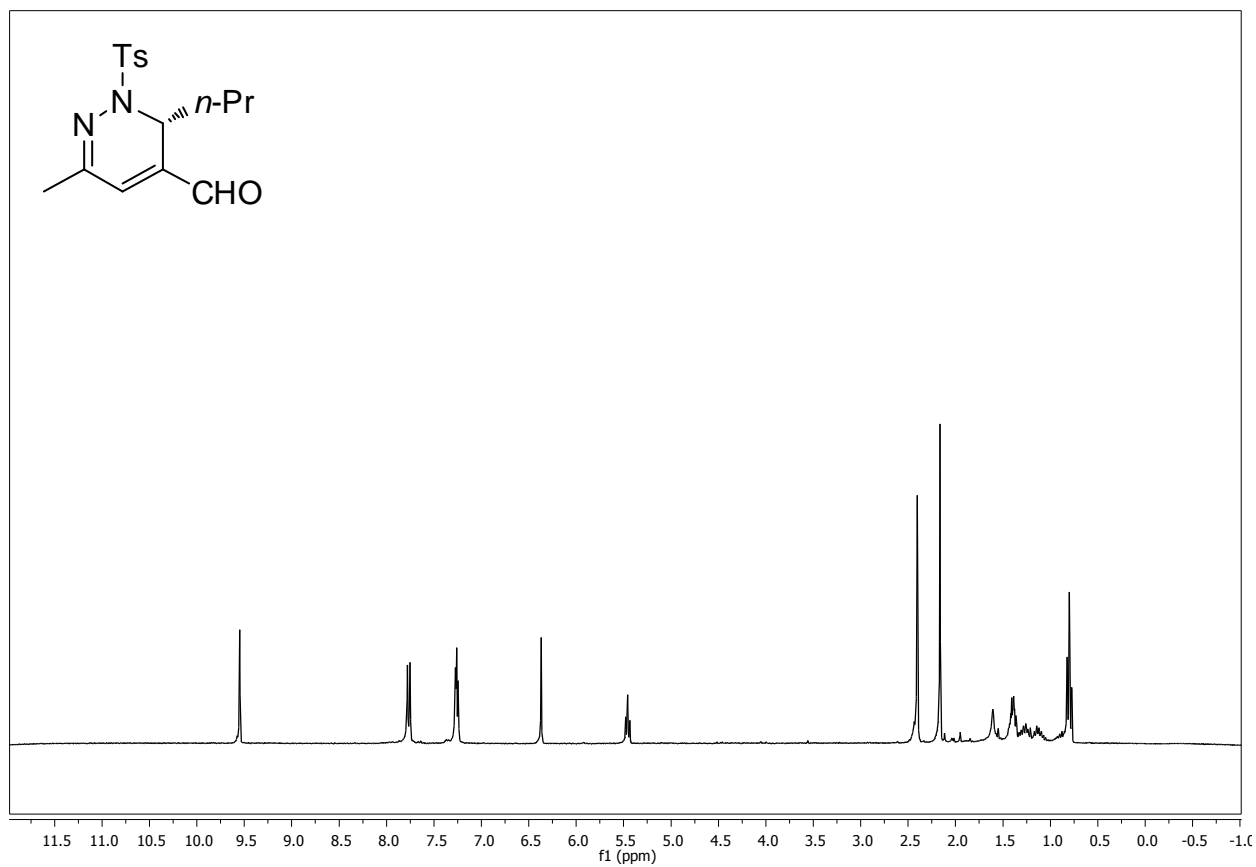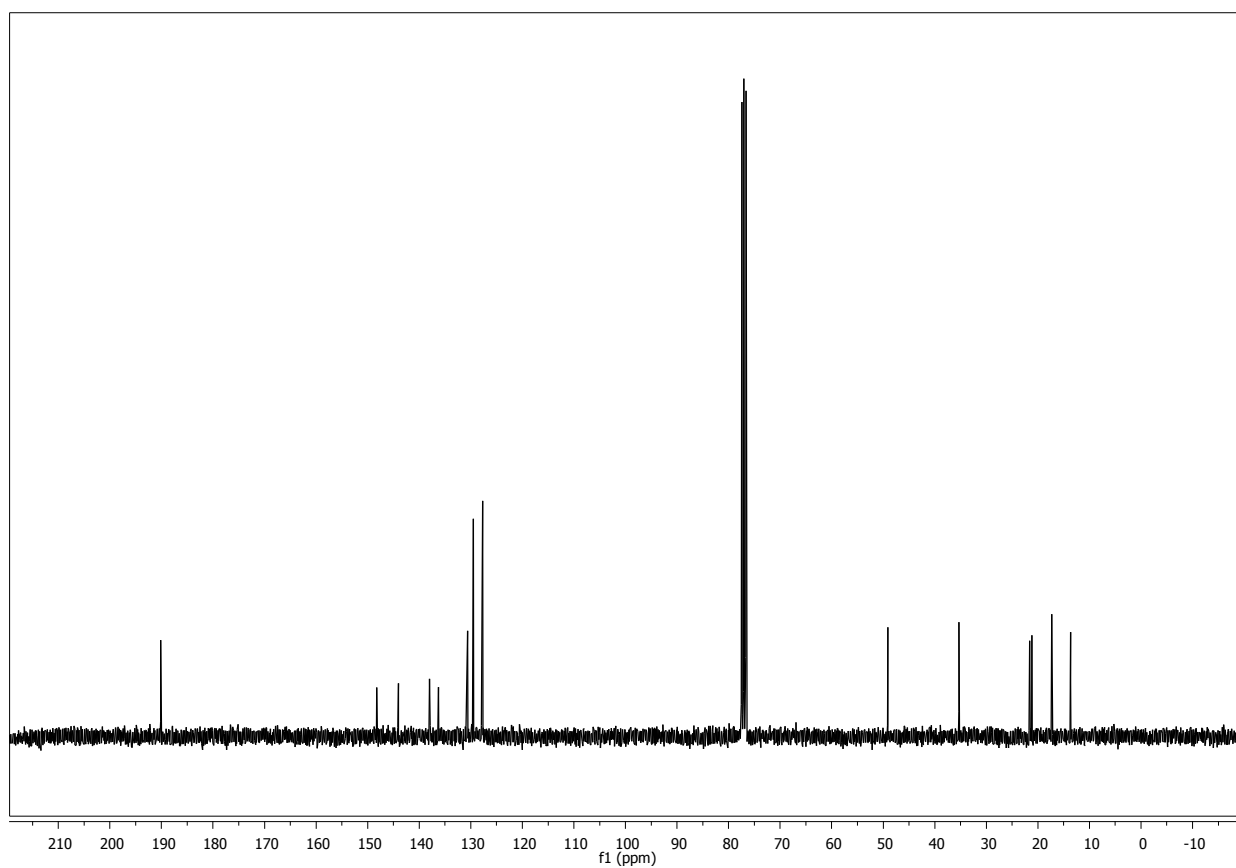

Figure S6: NMR spectra of compound **4d**.

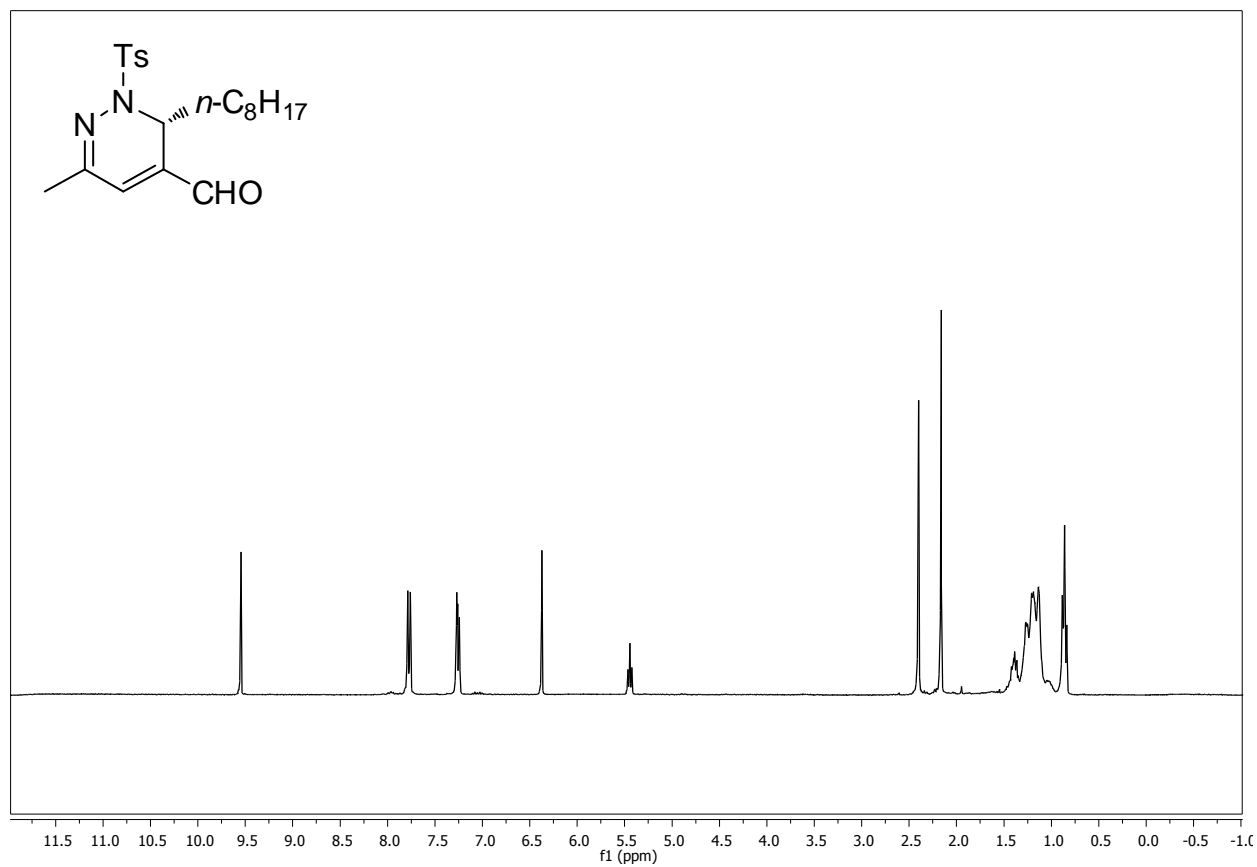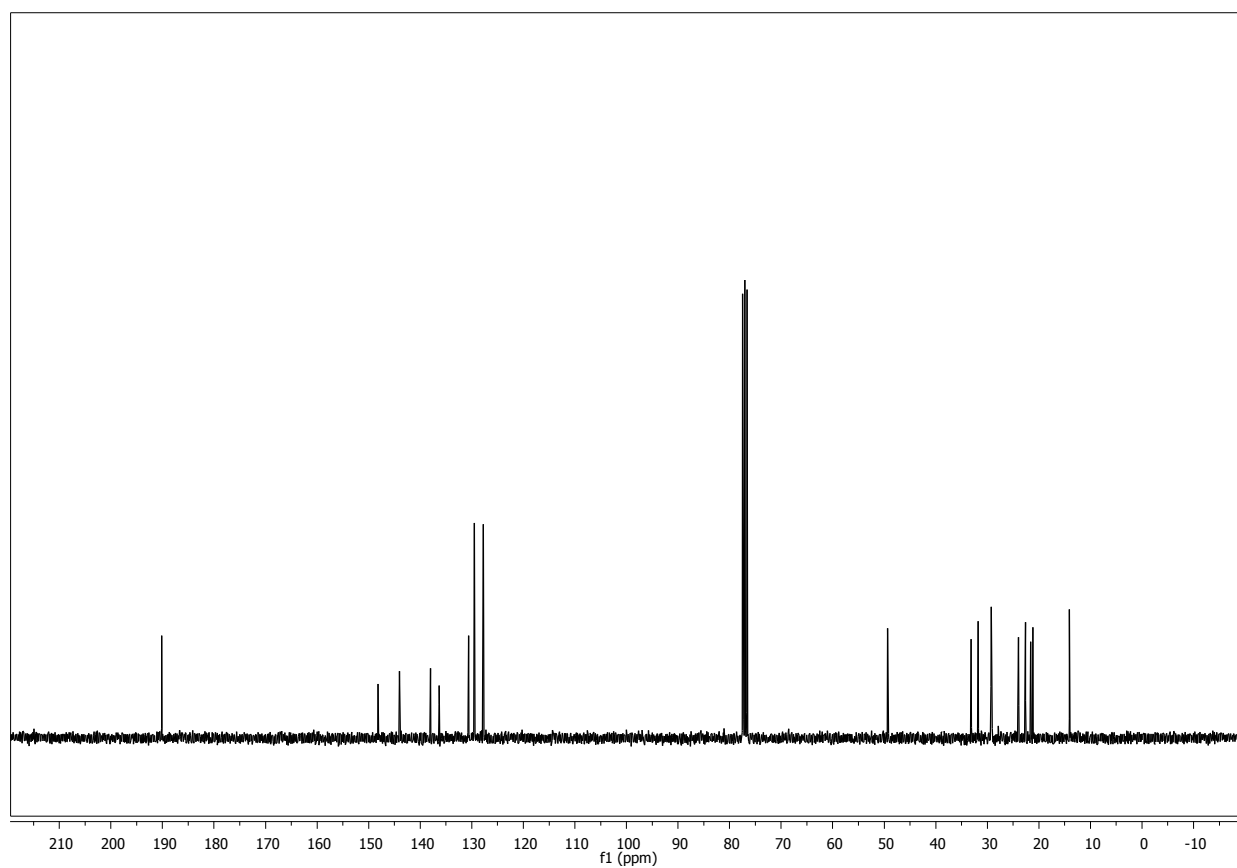

Figure S7: NMR spectra of compound **4e**.

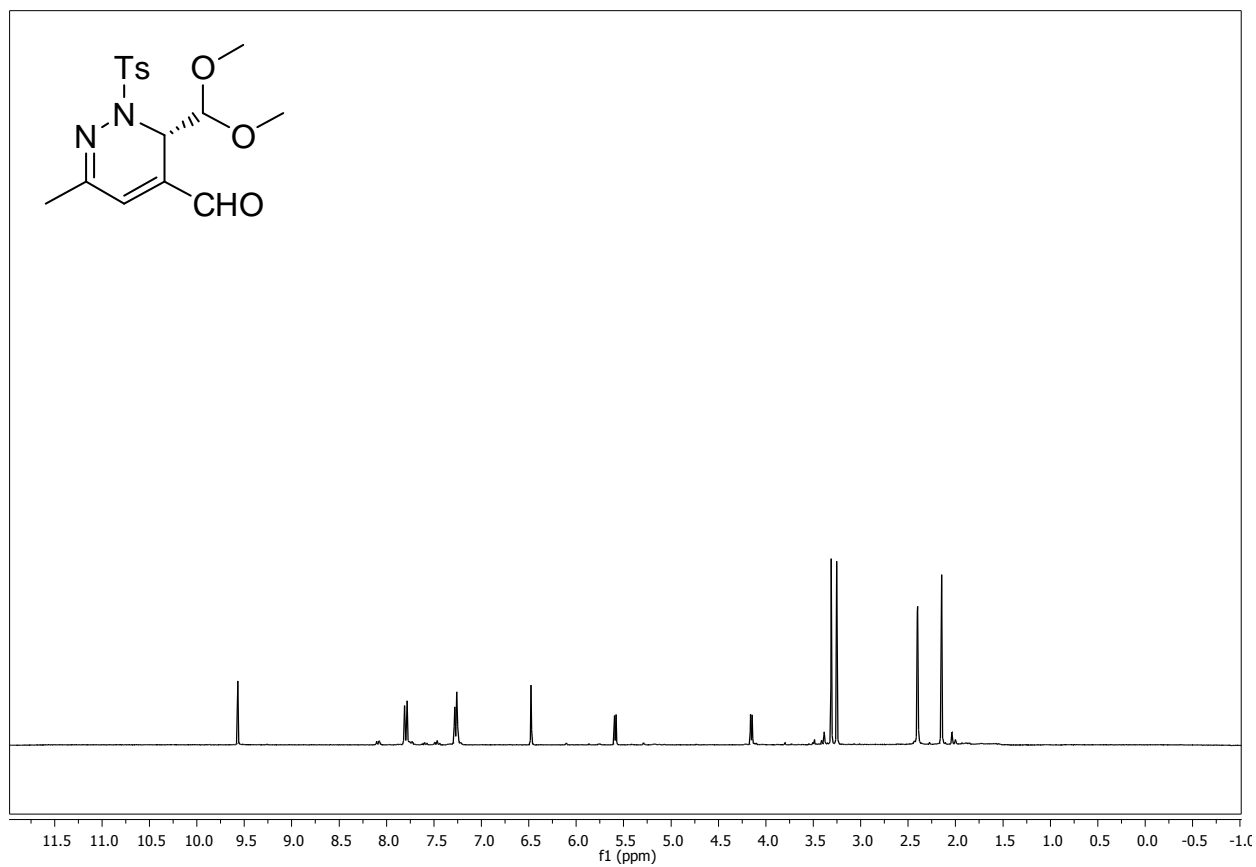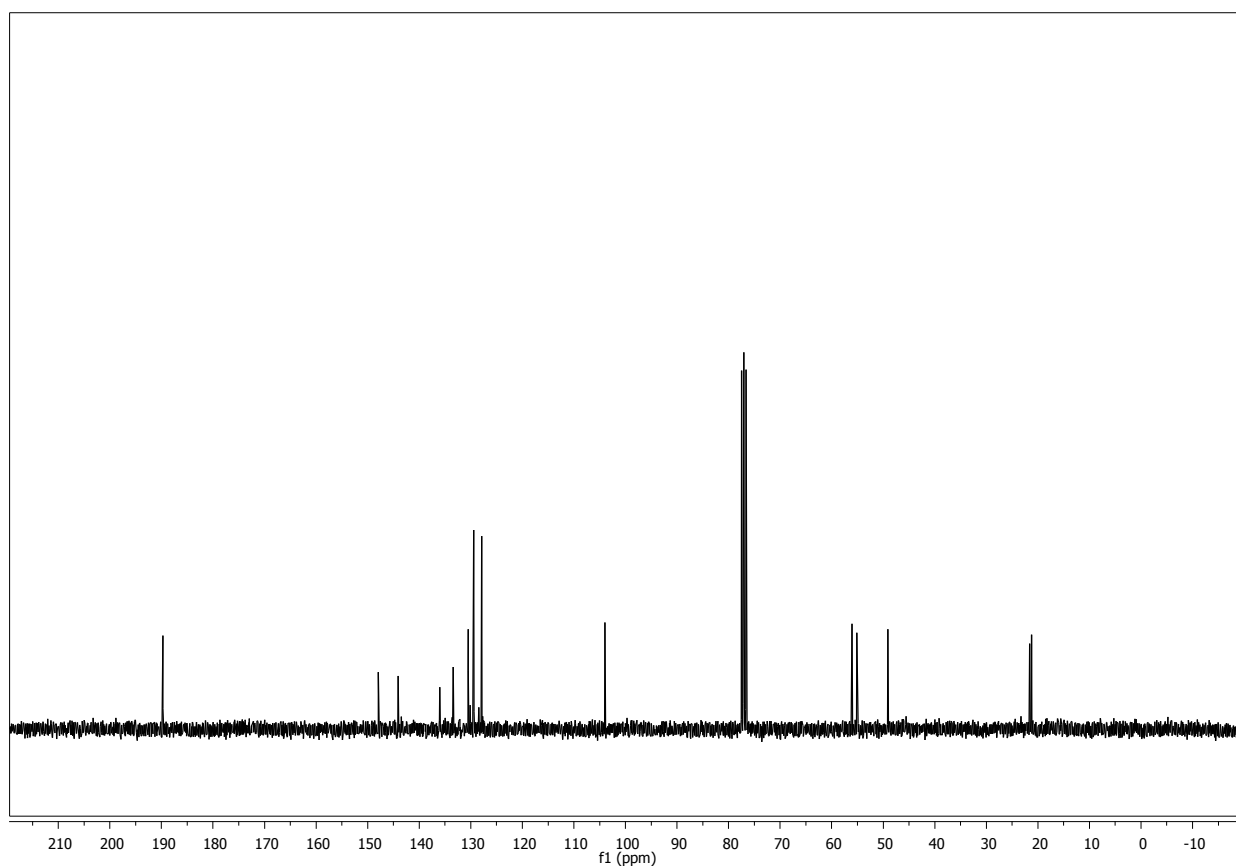

Figure S8: NMR spectra of compound **4f**.



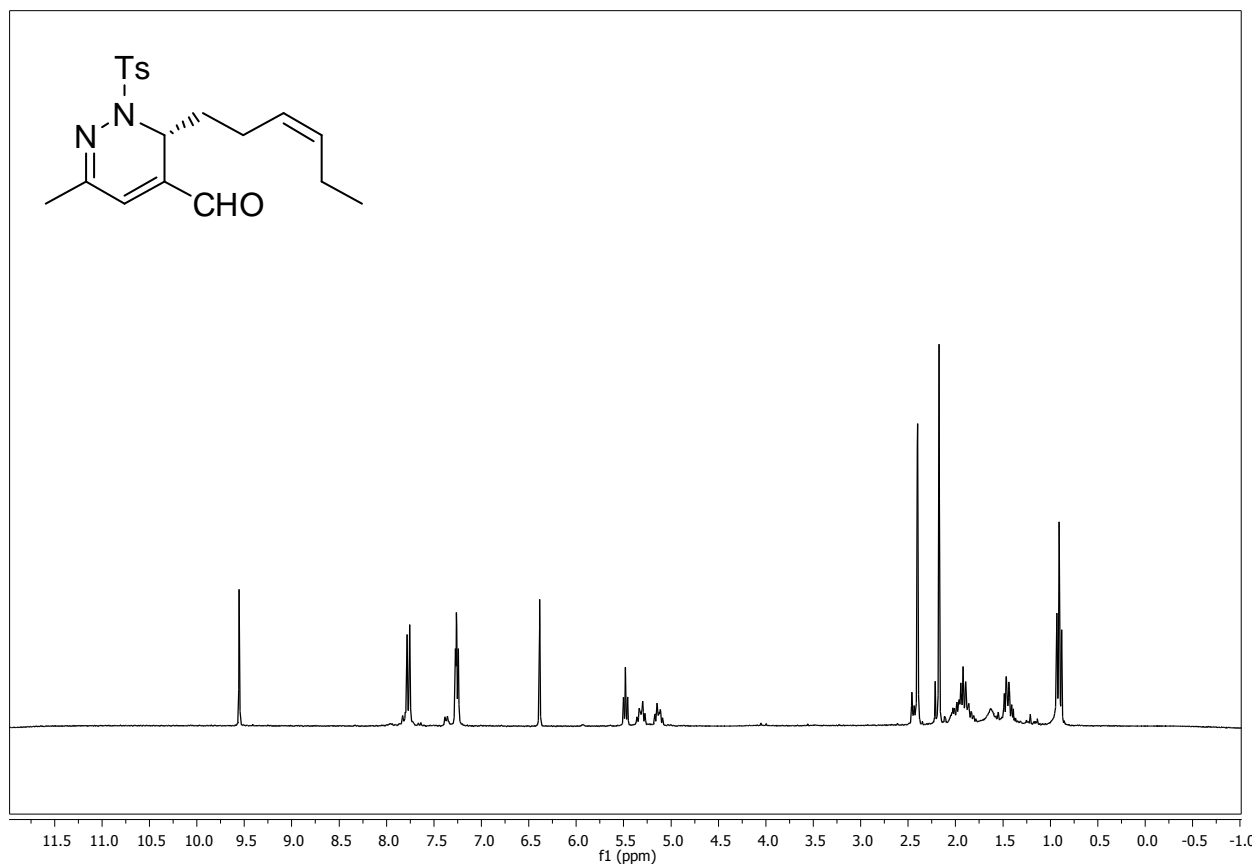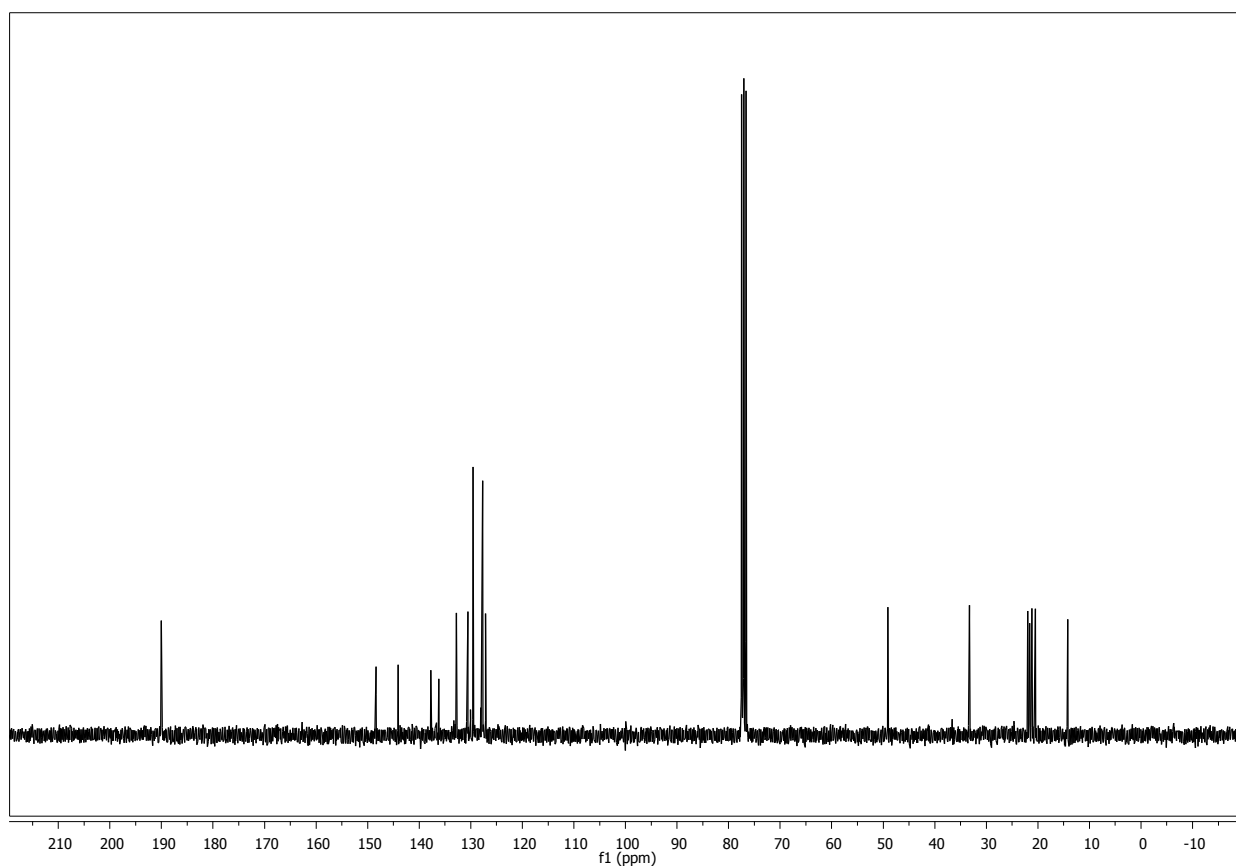

Figure S9: NMR spectra of compound **4g**.

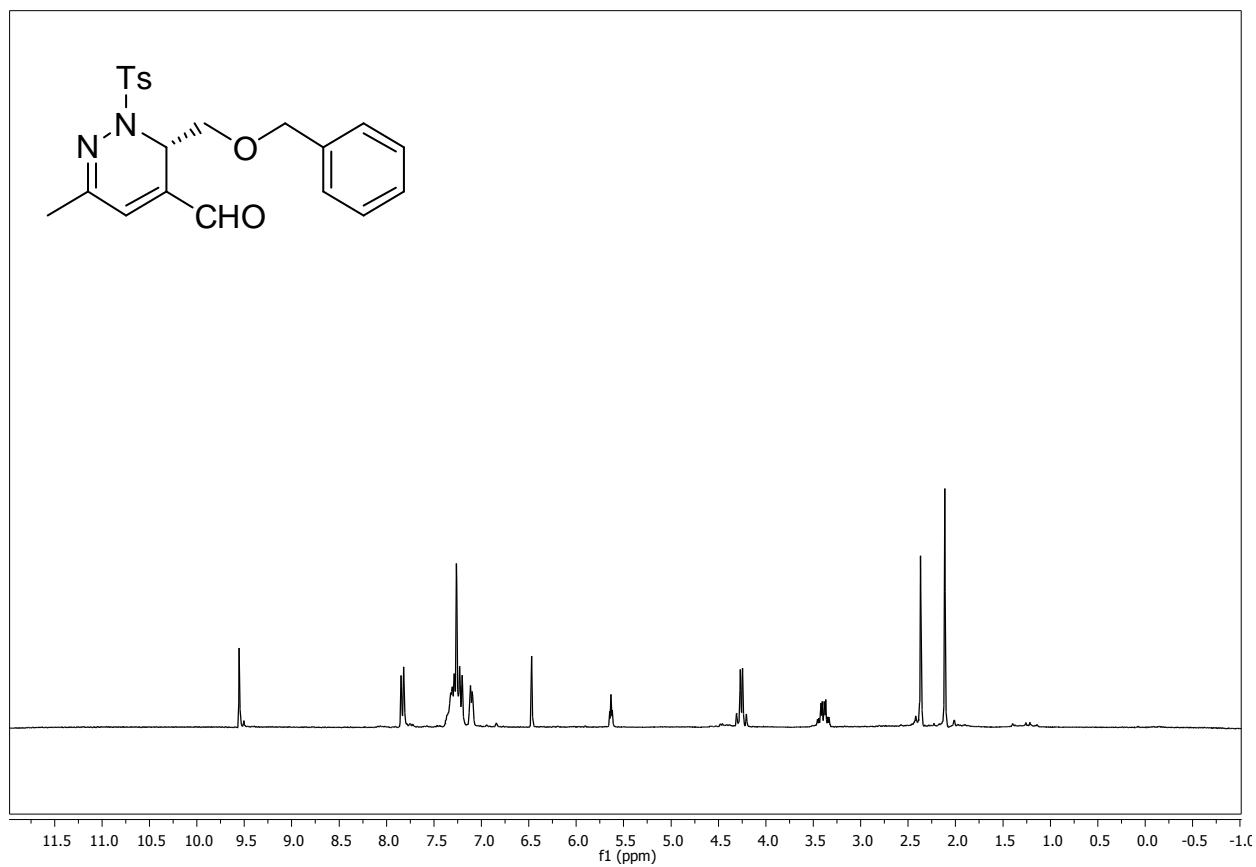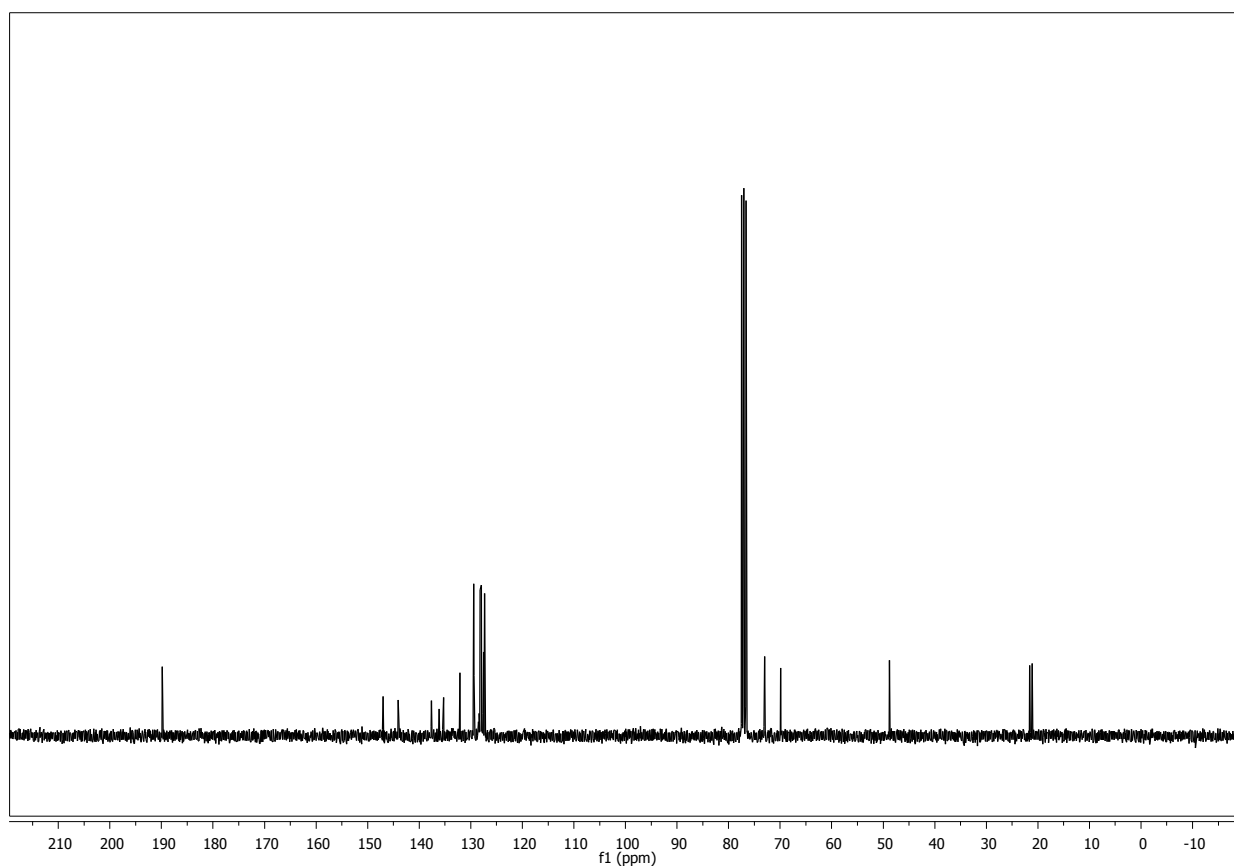

Figure S10: NMR spectra of compound **4h**.

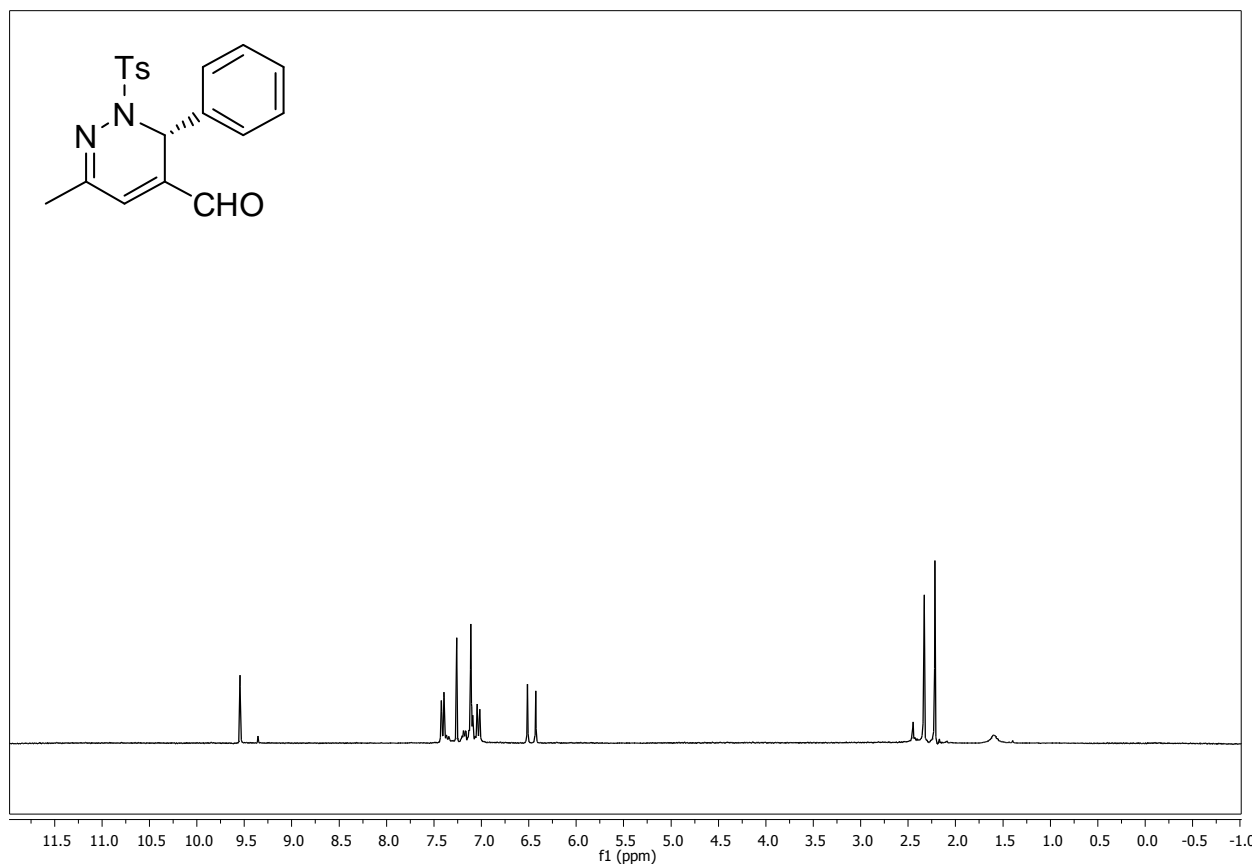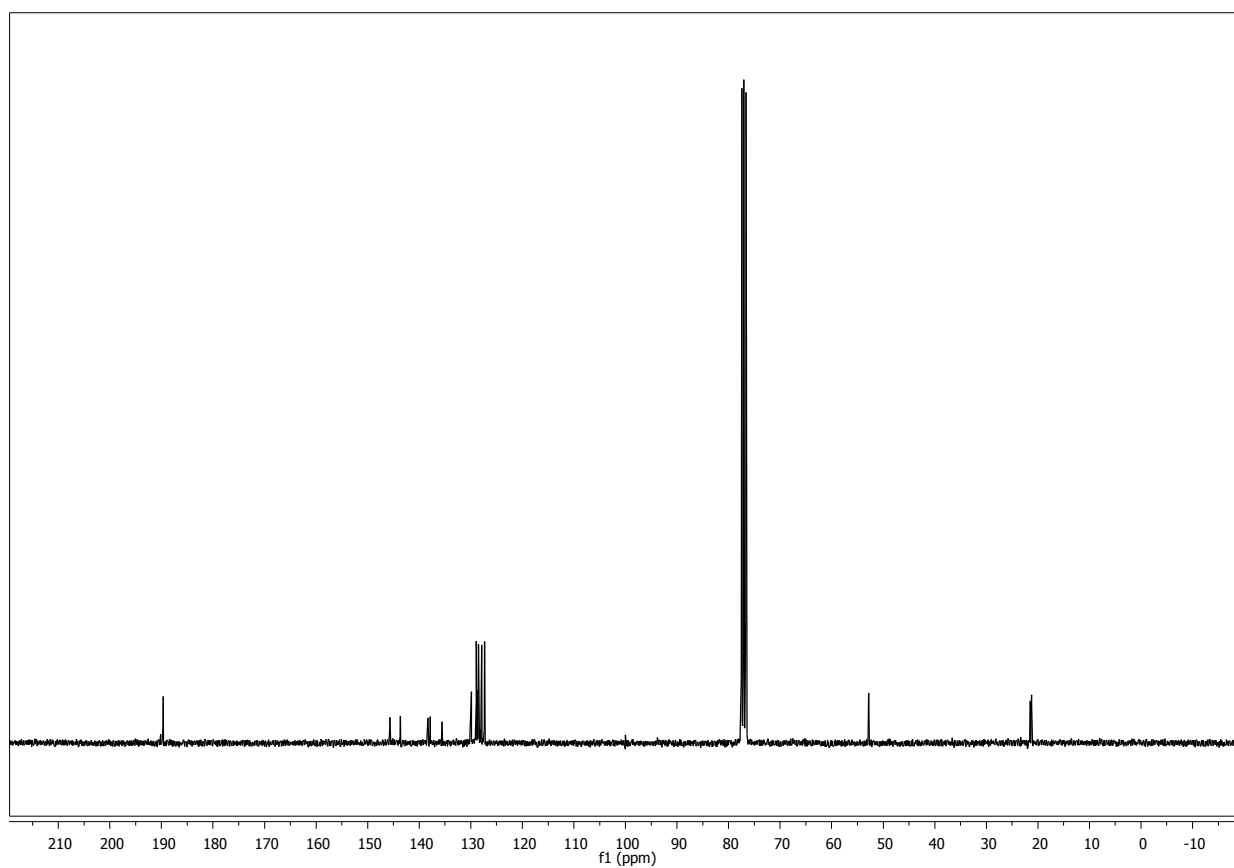

Figure S11: NMR spectra of compound **4i**.

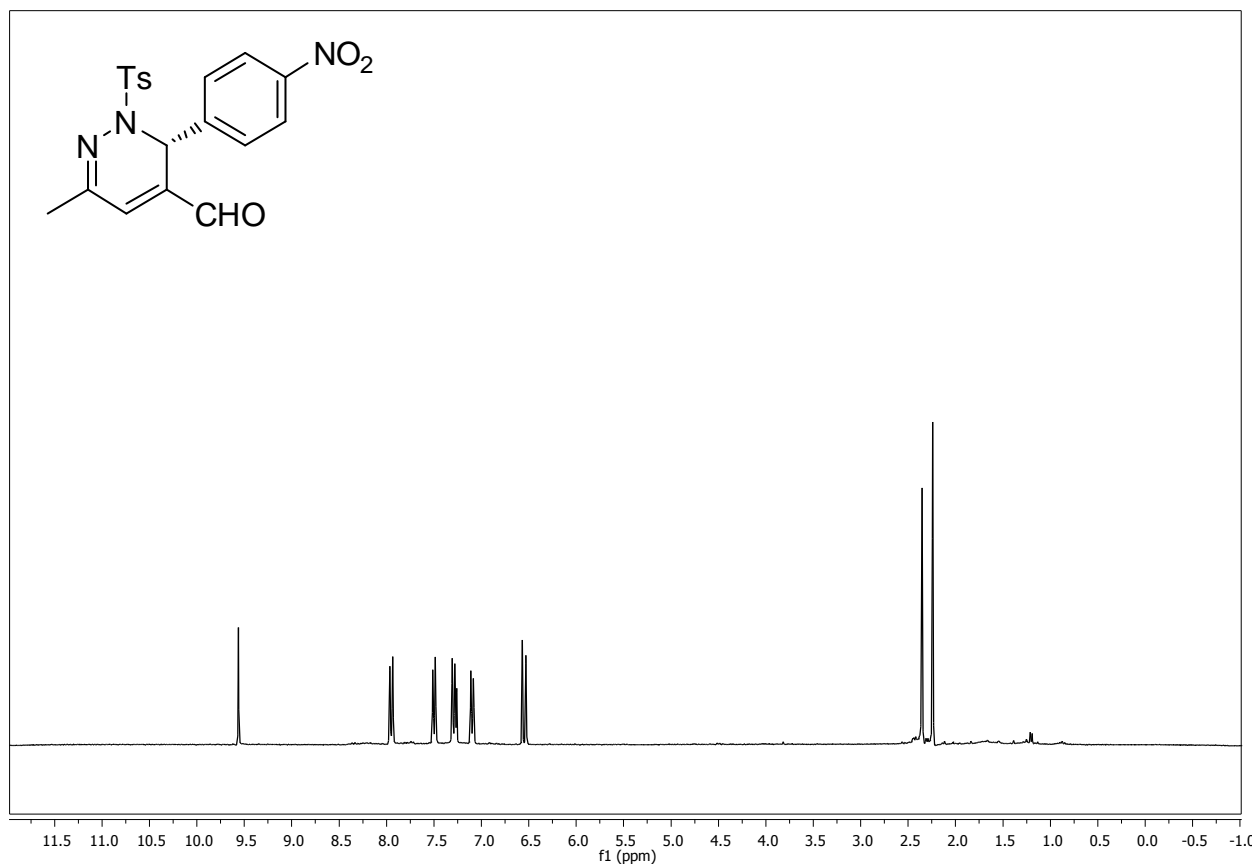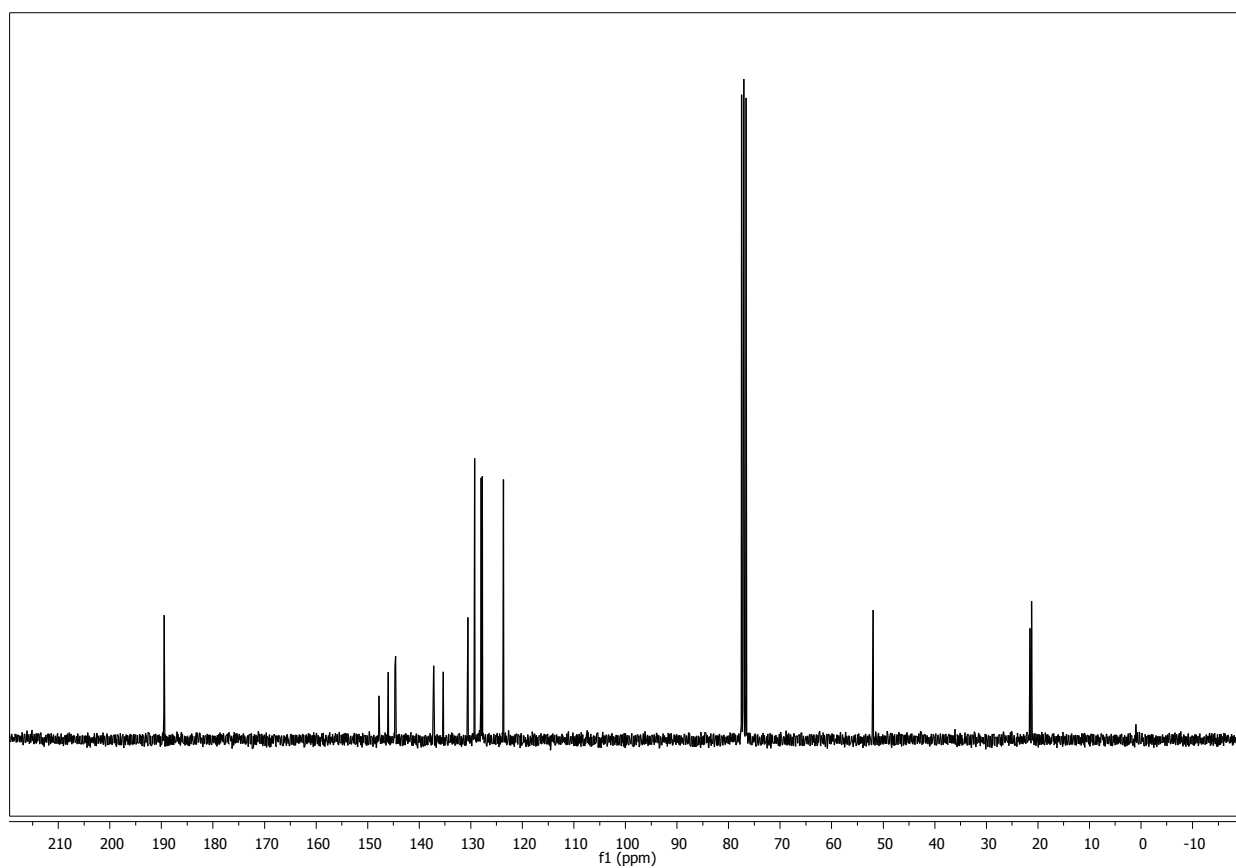

Figure S12: NMR spectra of compound **4j**.

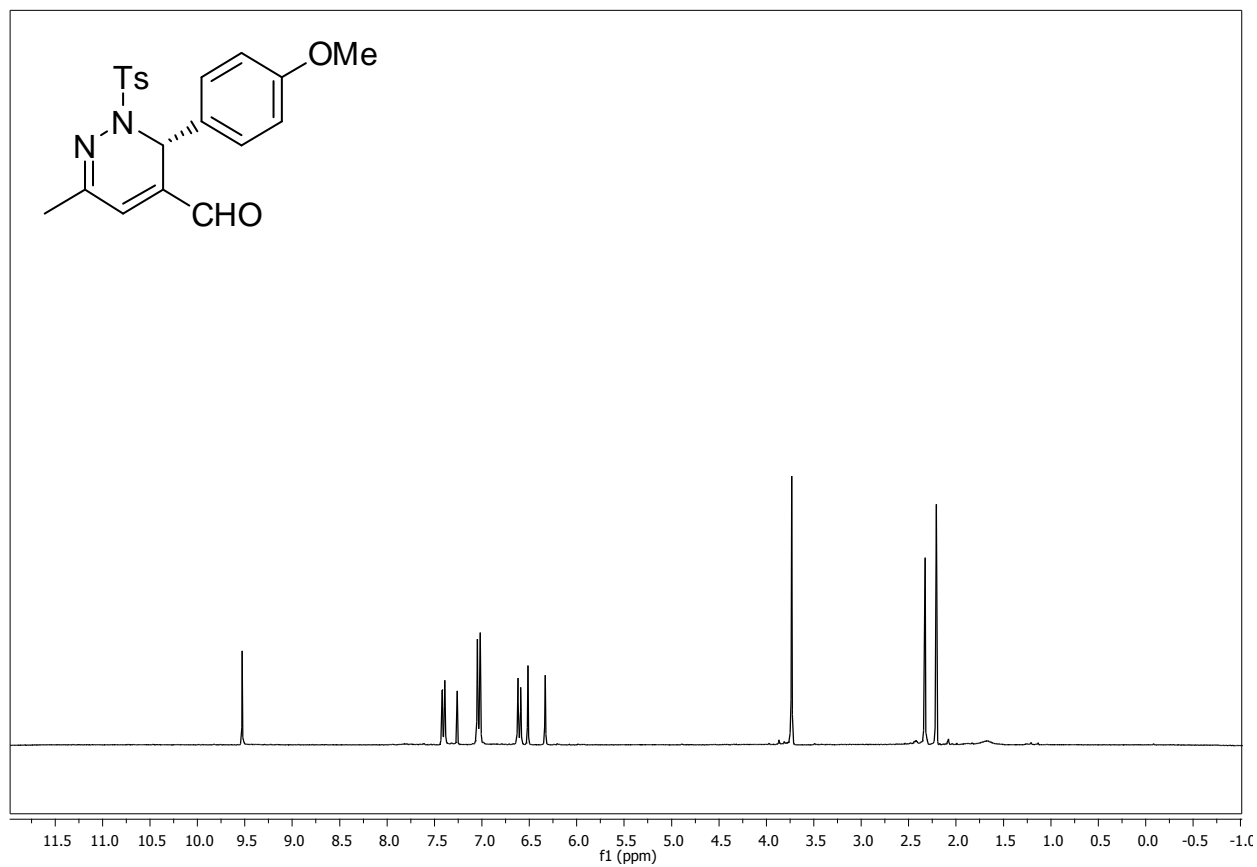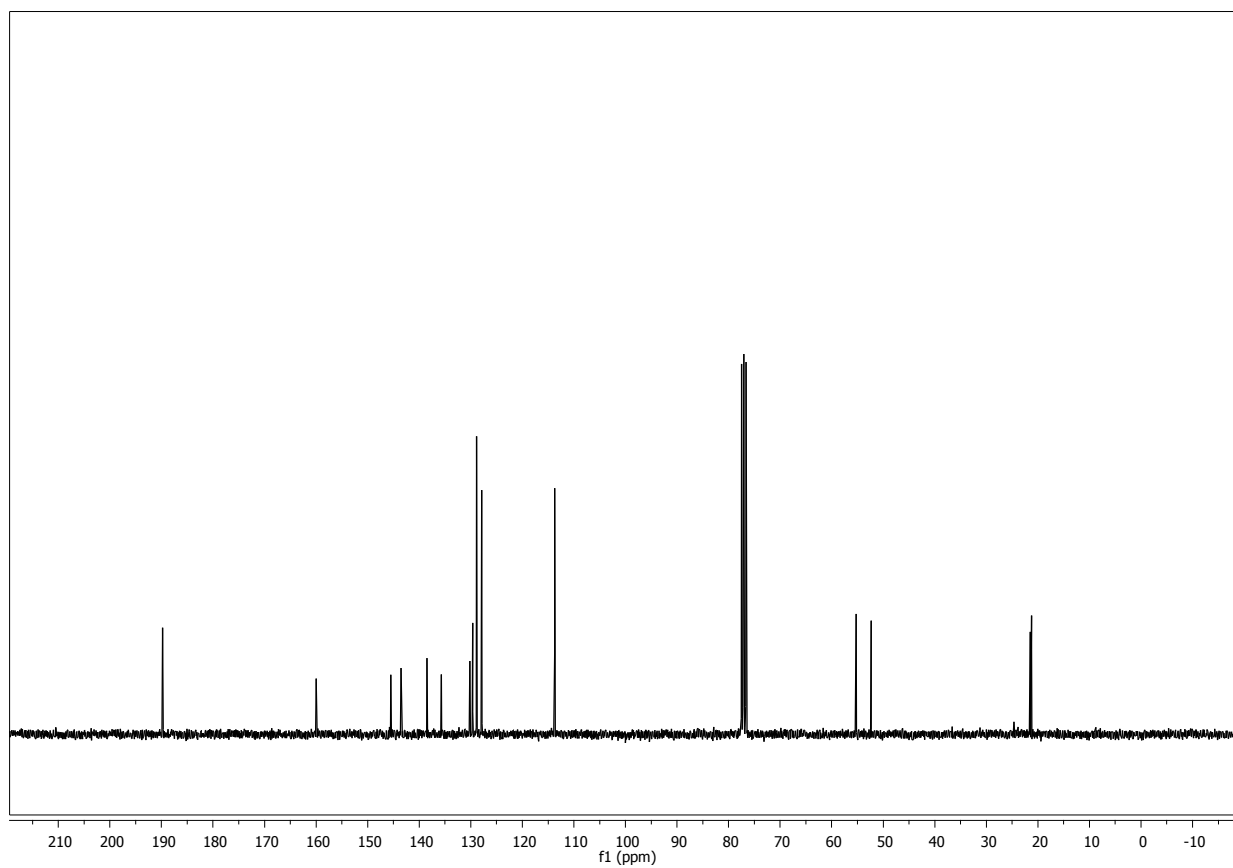

Figure S13: NMR spectra of compound **4k**.

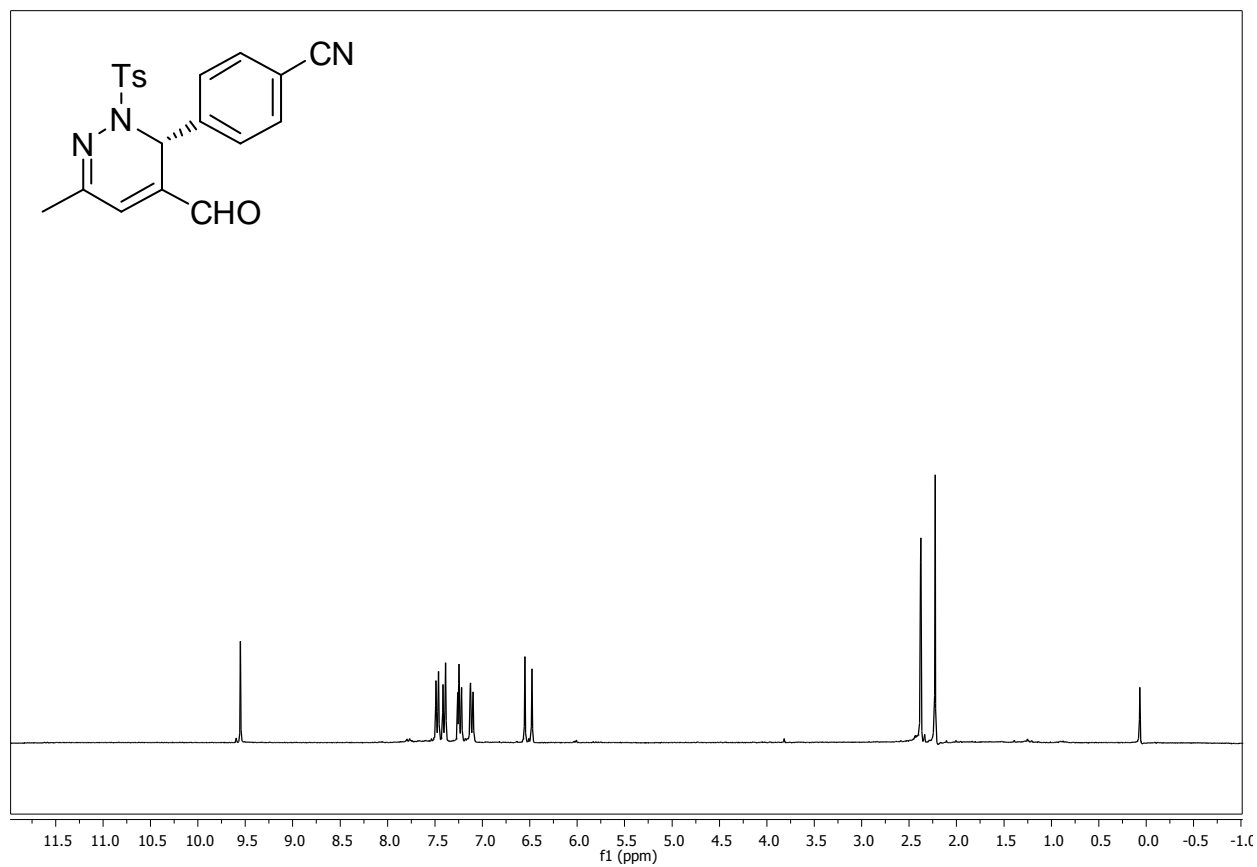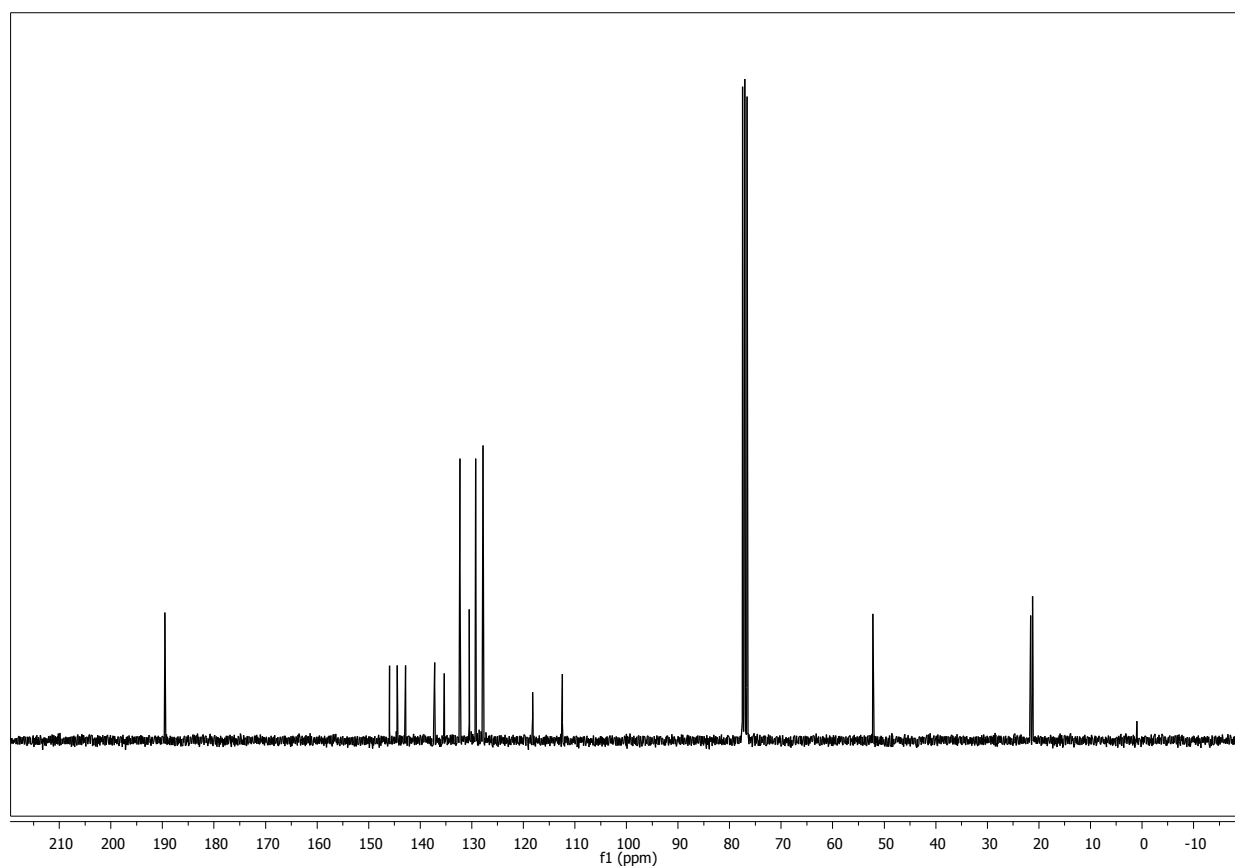

Figure S14: NMR spectra of compound **4I**.

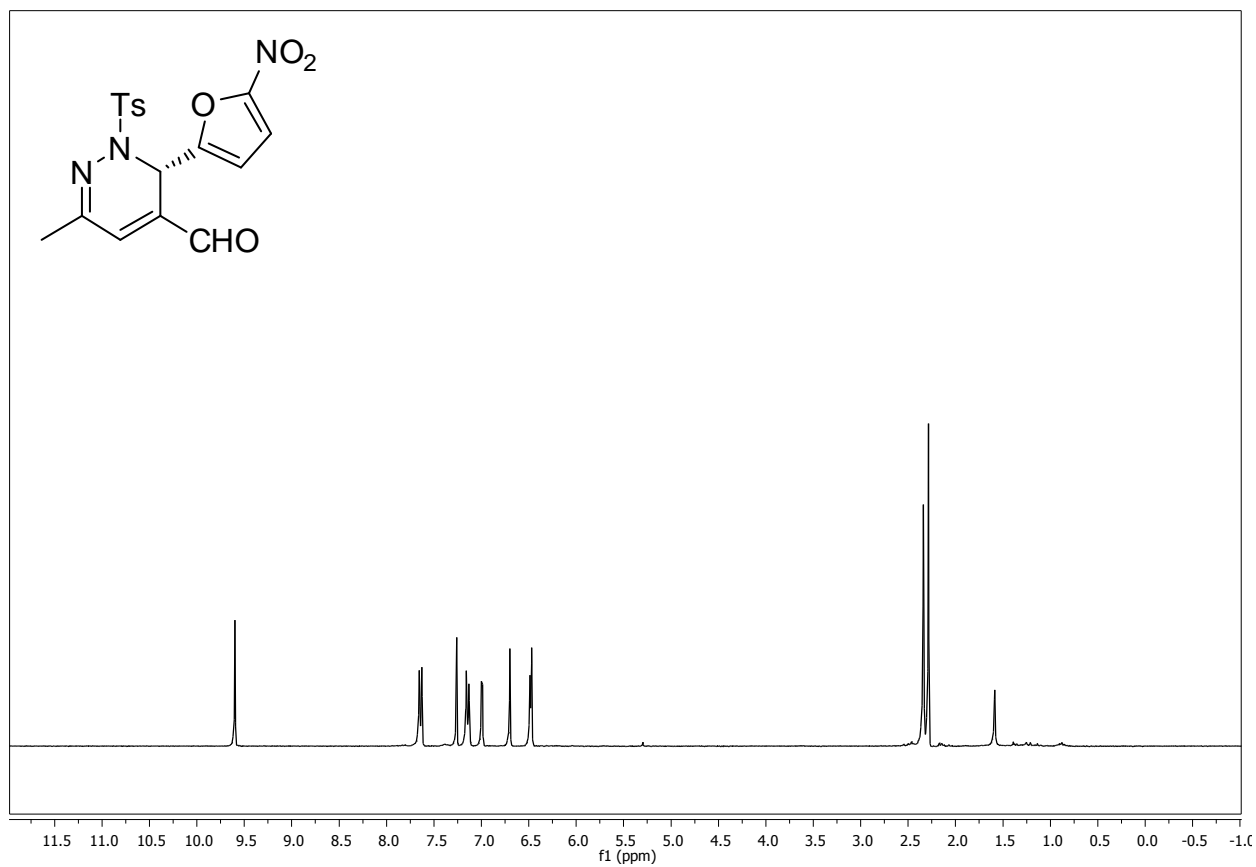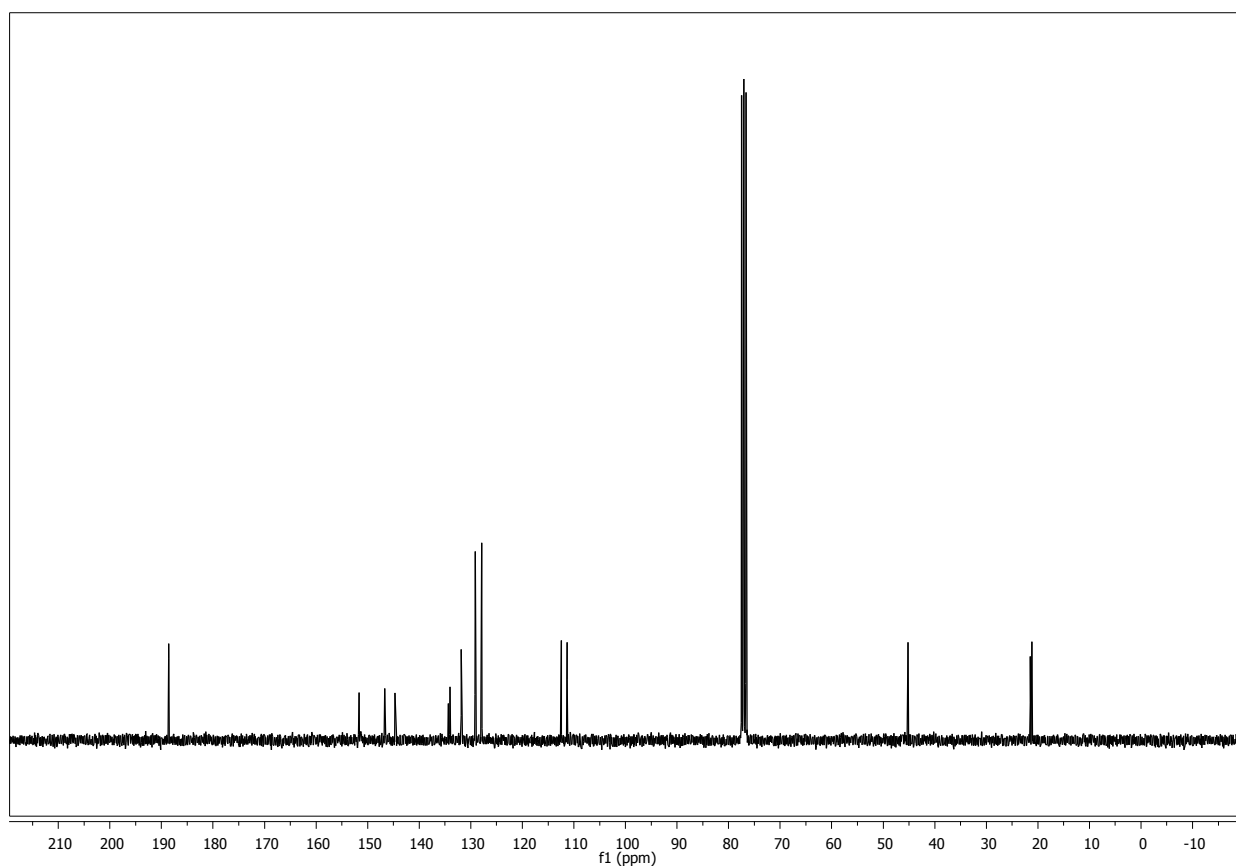

Figure S15: NMR spectra of compound **4m**.

### NMR spectra of compounds **5j**

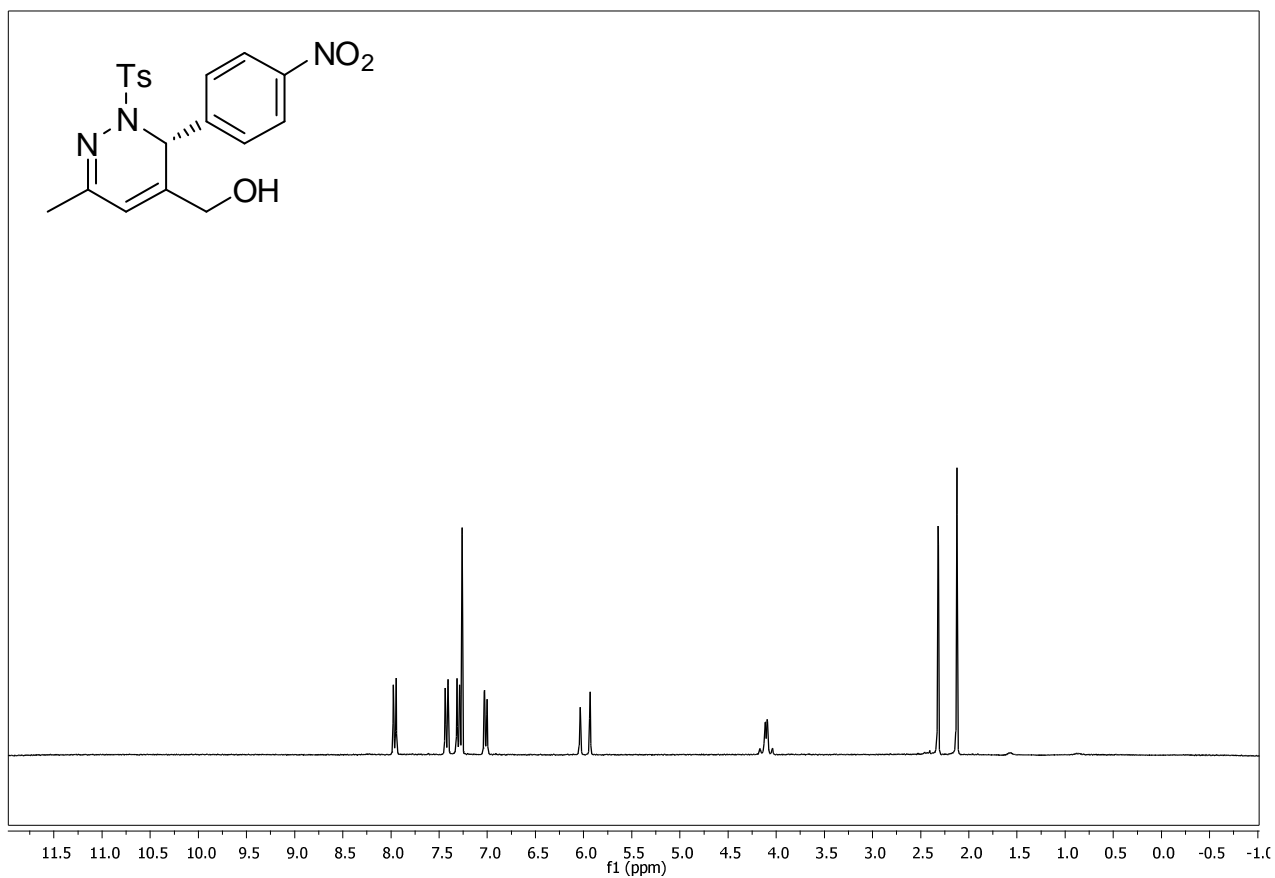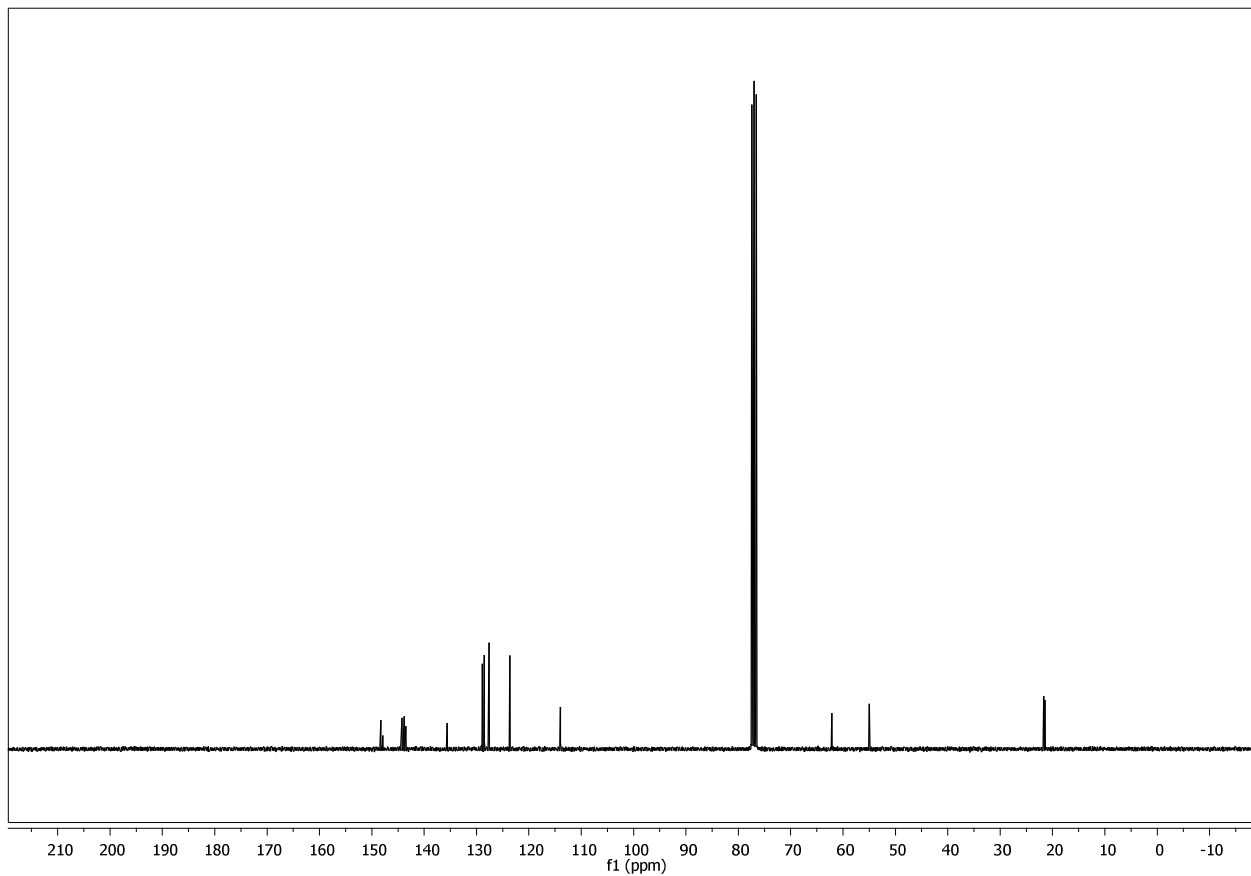

Figure S16: NMR spectra of compound **5j**.



### HPLC chromatograms of racemic and enantioenriched compounds 4a-m

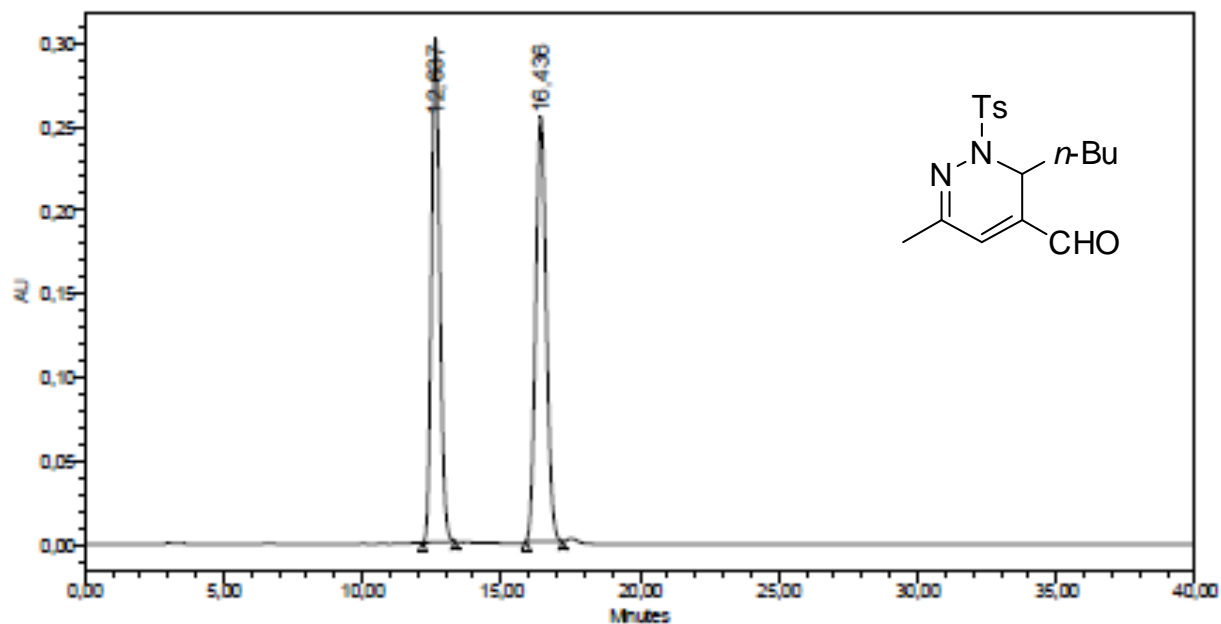

|   | RT     | % Area |
|---|--------|--------|
| 1 | 12,637 | 48,10  |
| 2 | 16,436 | 51,90  |

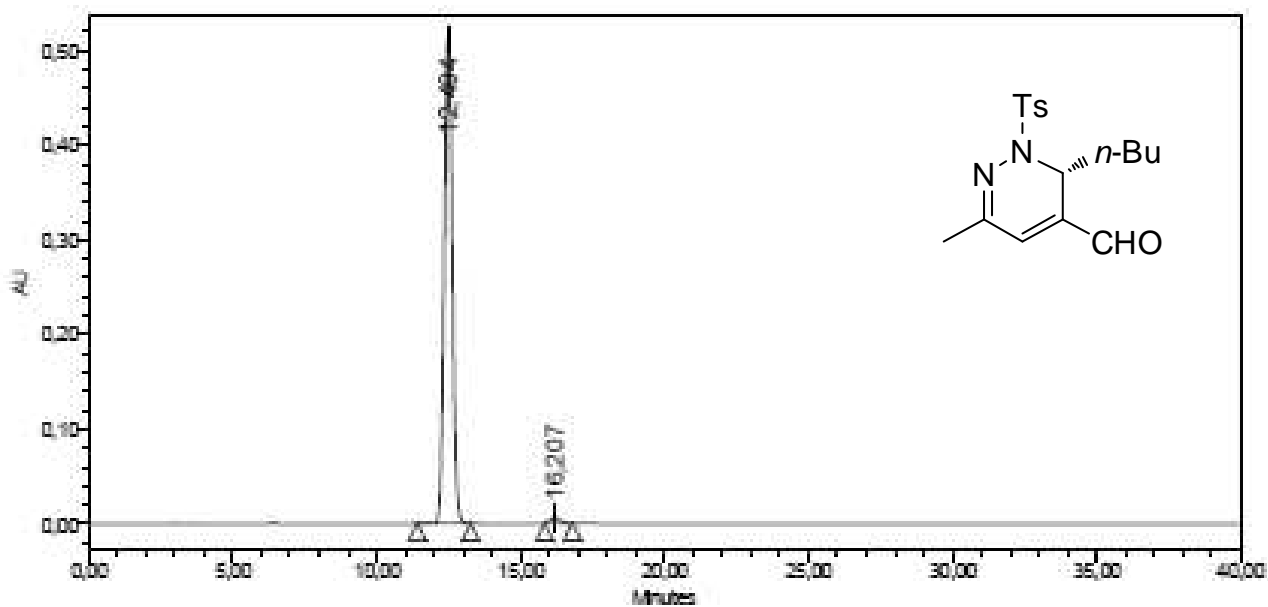

Peak Results

|   | RT     | Area (µV <sup>2</sup> sec) | Height (µV) | % Area |
|---|--------|----------------------------|-------------|--------|
| 1 | 12,494 | 9125710                    | 511982      | 98,47  |
| 2 | 16,207 | 141561                     | 6492        | 1,53   |

Figure S17: HPLC chromatogram of compound 4a.

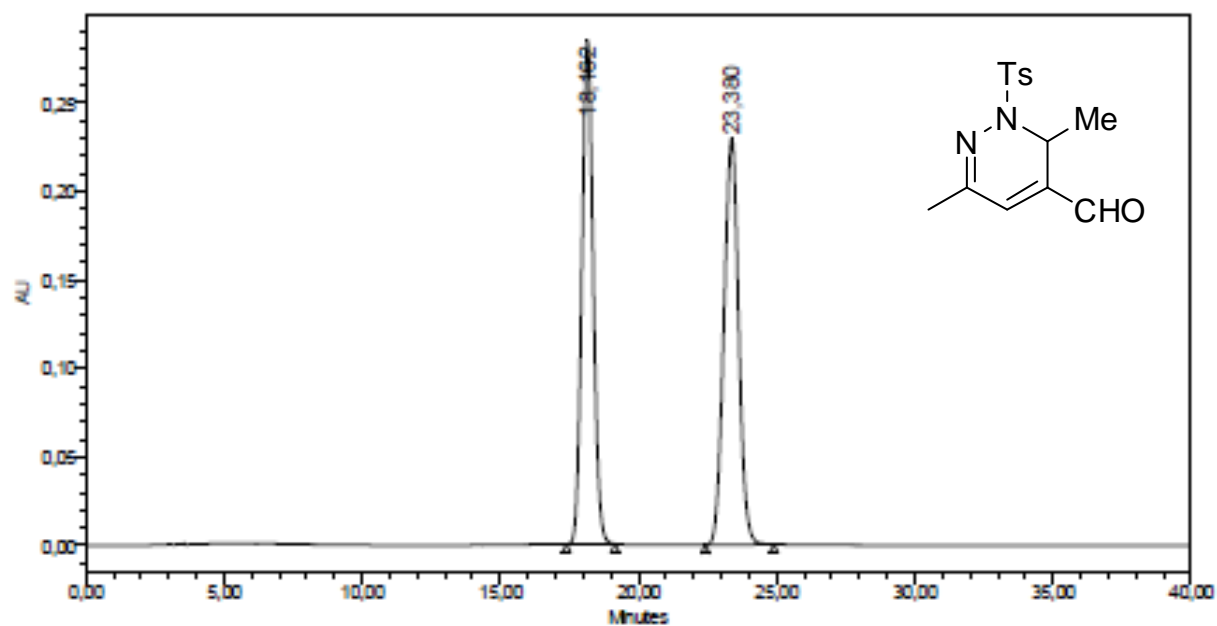

|   | RT     | % Area |
|---|--------|--------|
| 1 | 18,162 | 48,73  |
| 2 | 23,380 | 51,27  |

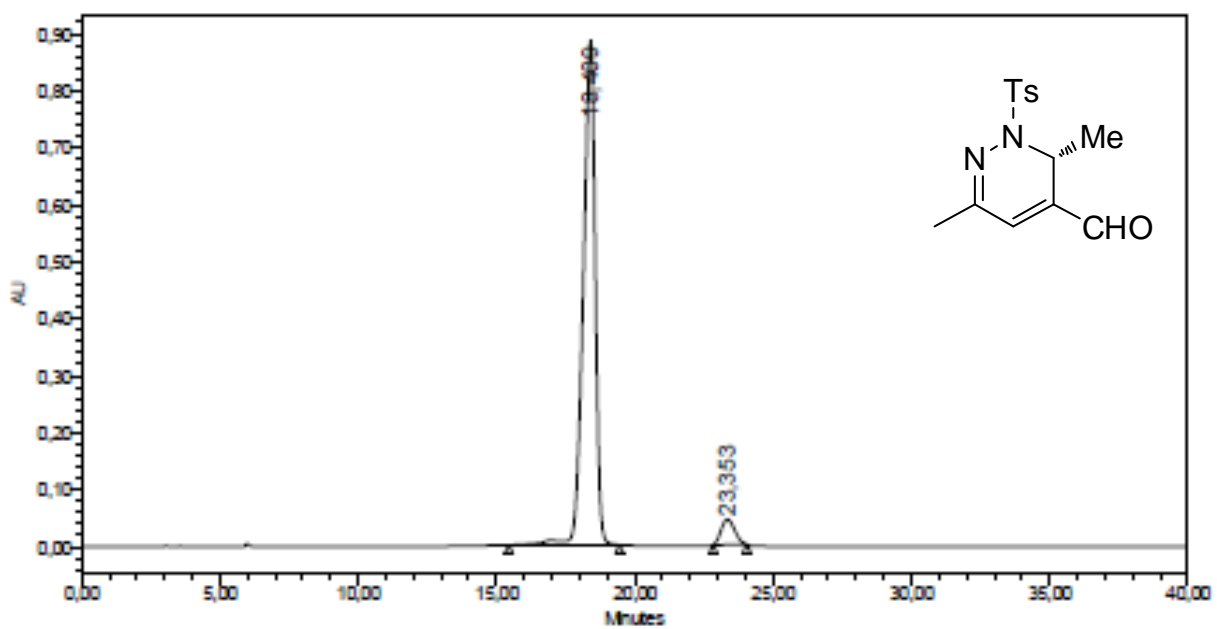

|   | RT     | % Area |
|---|--------|--------|
| 1 | 18,409 | 94,60  |
| 2 | 23,353 | 5,40   |

Figure S18: HPLC chromatogram of compound **4b**.

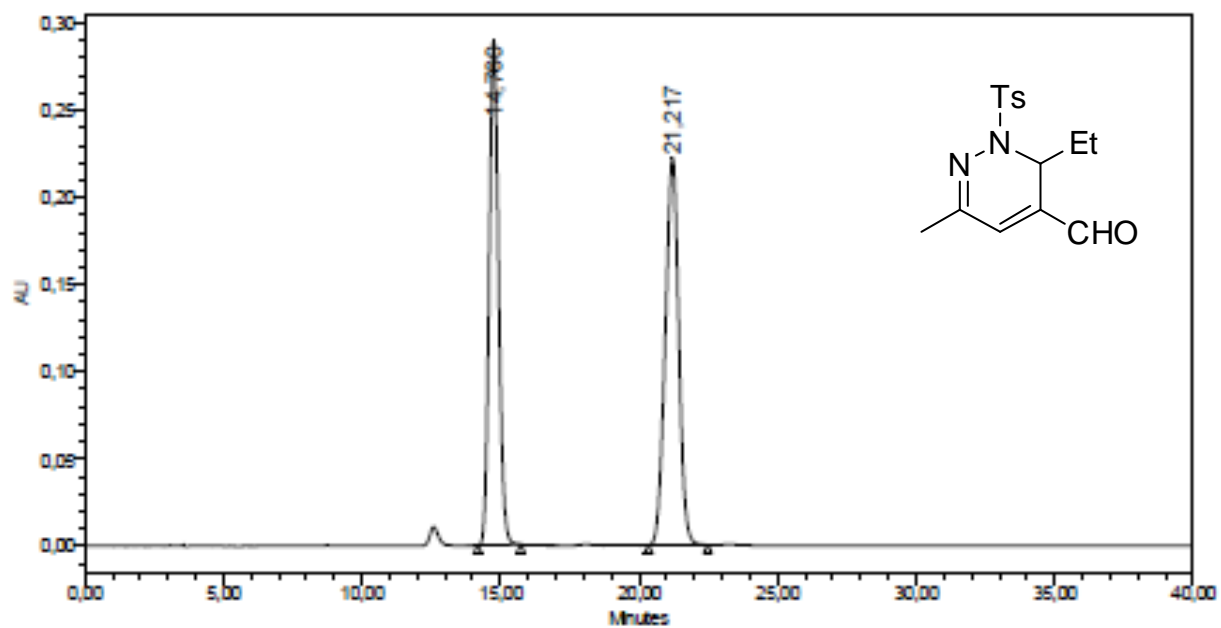

|   | RT     | % Area |
|---|--------|--------|
| 1 | 14,760 | 47,58  |
| 2 | 21,217 | 52,42  |

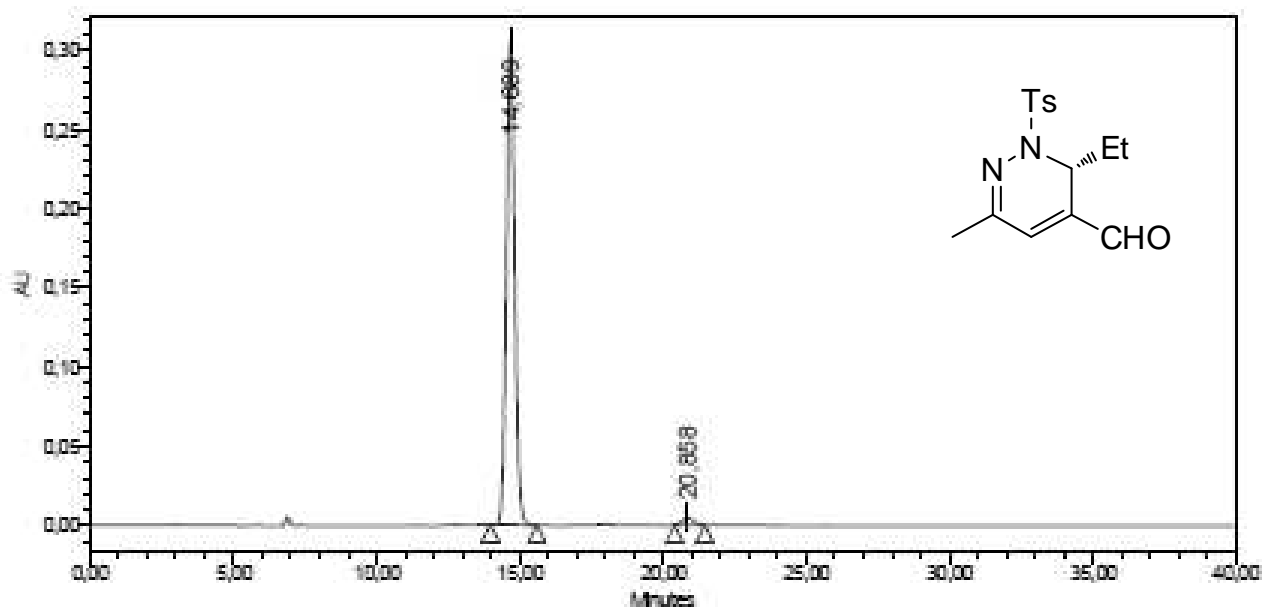

Peak Results

|   | RT     | Area<br>( $\mu\text{V}^2\text{sec}$ ) | Height<br>( $\mu\text{V}$ ) | % Area |
|---|--------|---------------------------------------|-----------------------------|--------|
| 1 | 14,689 | 6210686                               | 306119                      | 97,99  |
| 2 | 20,868 | 127215                                | 4602                        | 2,01   |

Figure S19: HPLC chromatogram of compound 4c.

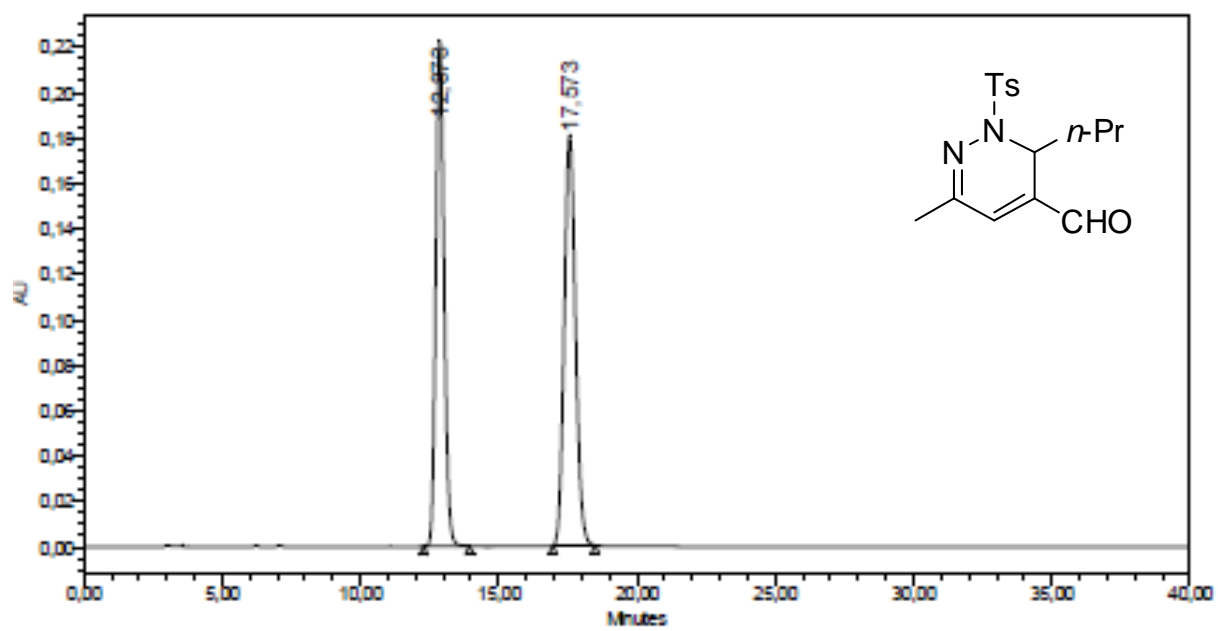

|   | RT     | % Area |
|---|--------|--------|
| 1 | 12,873 | 47,56  |
| 2 | 17,573 | 52,44  |

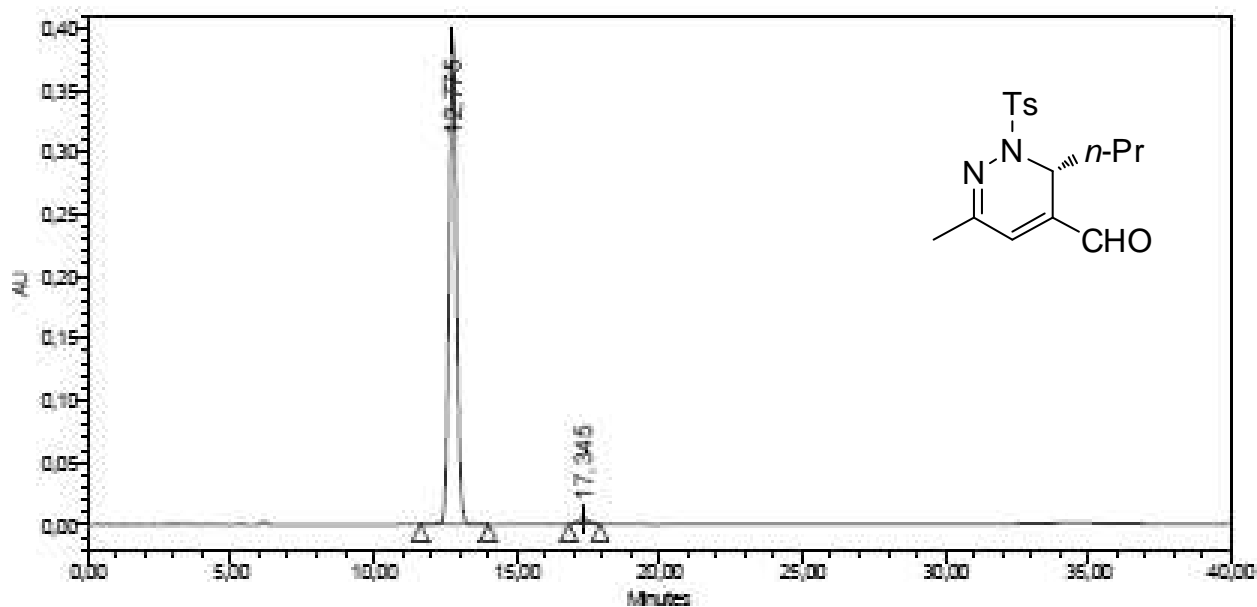

Peak Results

|   | RT     | Area (µV <sup>2</sup> sec) | Height (µV) | % Area |
|---|--------|----------------------------|-------------|--------|
| 1 | 12,775 | 6985021                    | 390070      | 98,14  |
| 2 | 17,345 | 132115                     | 5193        | 1,86   |

Figure S20: HPLC chromatogram of compound **4d**.

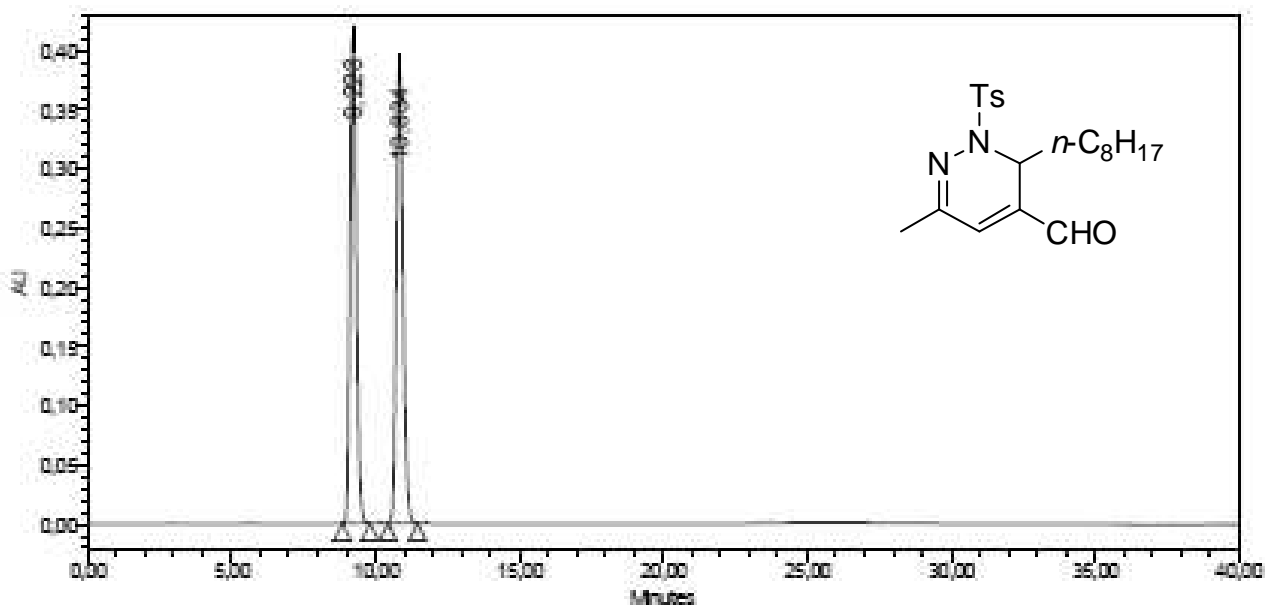

Peak Results

|   | RT     | Area<br>( $\mu\text{V}^2\text{sec}$ ) | Height<br>( $\mu\text{V}$ ) | % Area |
|---|--------|---------------------------------------|-----------------------------|--------|
| 1 | 9,223  | 5590066                               | 409159                      | 46,85  |
| 2 | 10,834 | 6340806                               | 385133                      | 53,15  |

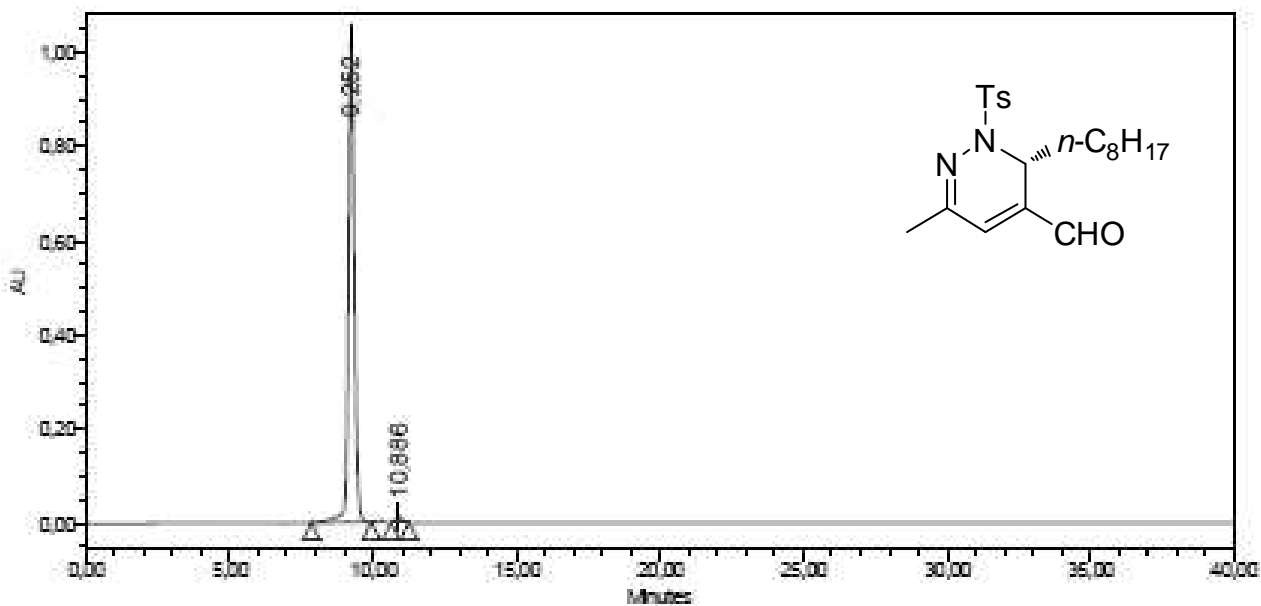

Peak Results

|   | RT     | Area<br>( $\mu\text{V}^2\text{sec}$ ) | Height<br>( $\mu\text{V}$ ) | % Area |
|---|--------|---------------------------------------|-----------------------------|--------|
| 1 | 9,252  | 14916286                              | 1029615                     | 98,53  |
| 2 | 10,886 | 223182                                | 14047                       | 1,47   |

Figure S21: HPLC chromatogram of compound **4e**.

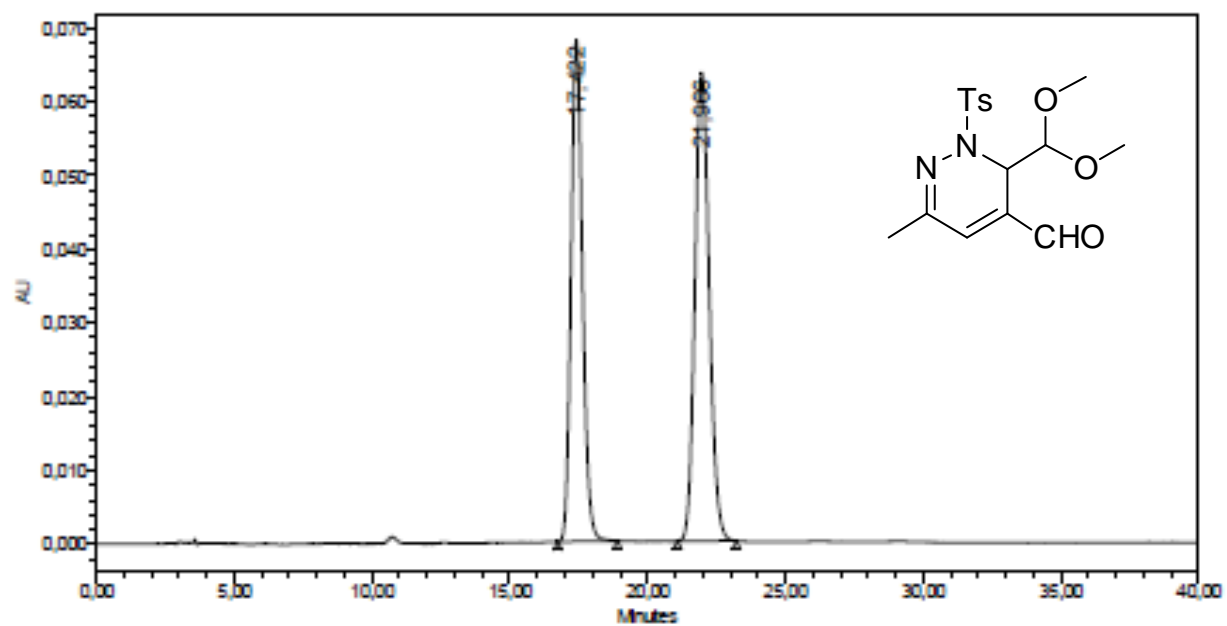

|   | RT     | % Area |
|---|--------|--------|
| 1 | 17,422 | 46,21  |
| 2 | 21,966 | 53,79  |

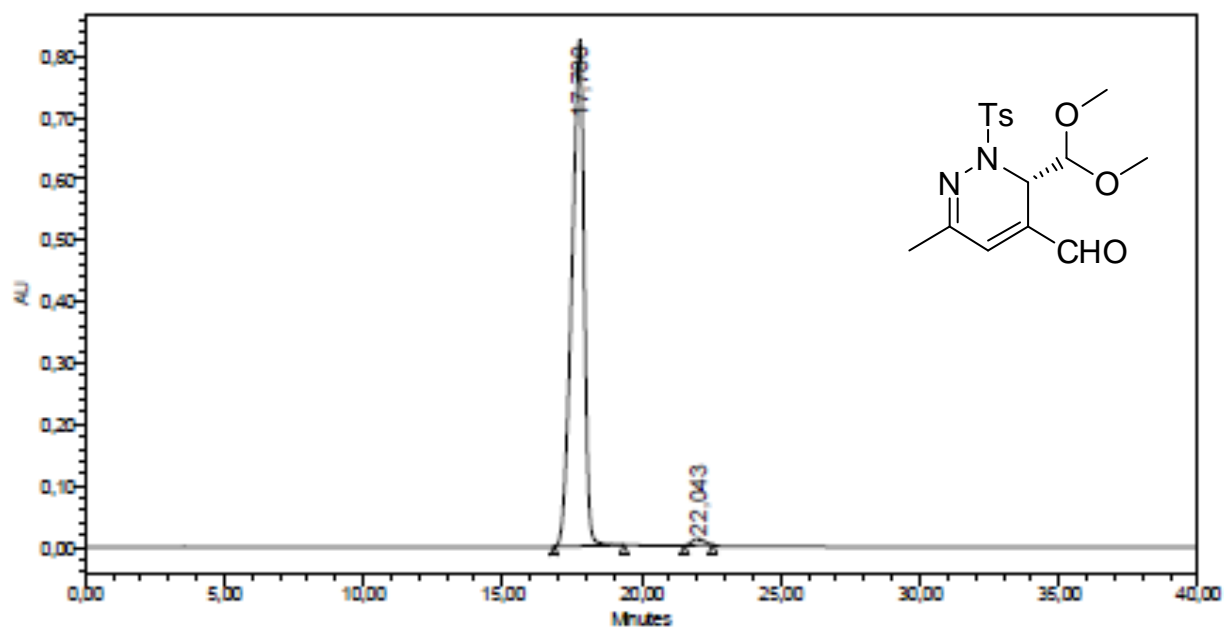

|   | RT     | % Area |
|---|--------|--------|
| 1 | 17,780 | 98,68  |
| 2 | 22,043 | 1,32   |

Figure S22: HPLC chromatogram of compound 4f.

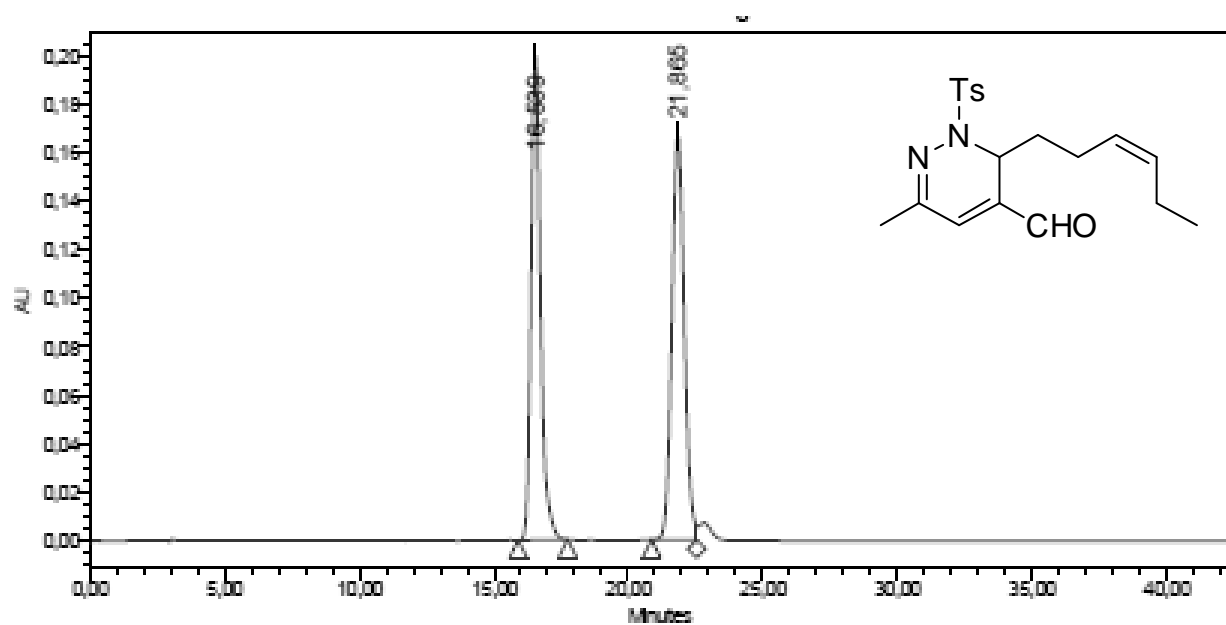

Peak Results

|   | RT     | Area (µV <sup>2</sup> sec) | Height (µV) | % Area |
|---|--------|----------------------------|-------------|--------|
| 1 | 16,539 | 4918822                    | 199211      | 47,98  |
| 2 | 21,865 | 5332350                    | 166028      | 52,02  |

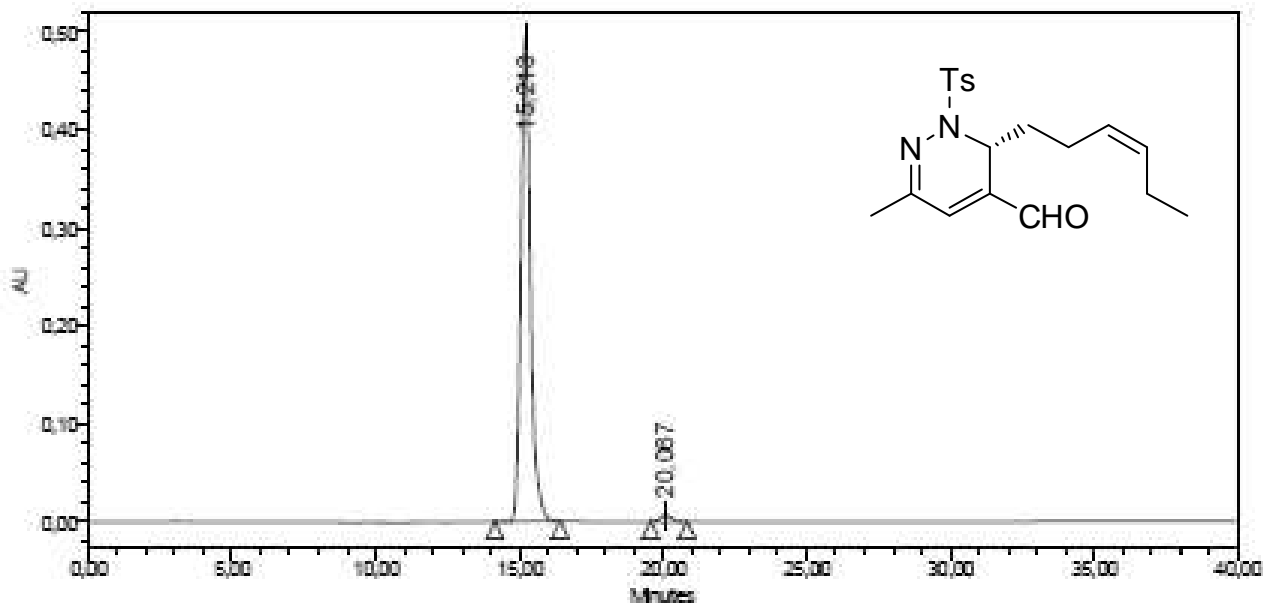

Peak Results

|   | RT     | Area (µV <sup>2</sup> sec) | Height (µV) | % Area |
|---|--------|----------------------------|-------------|--------|
| 1 | 15,213 | 11527226                   | 495138      | 98,33  |
| 2 | 20,067 | 195417                     | 6967        | 1,67   |

Figure S23: HPLC chromatogram of compound 4g.

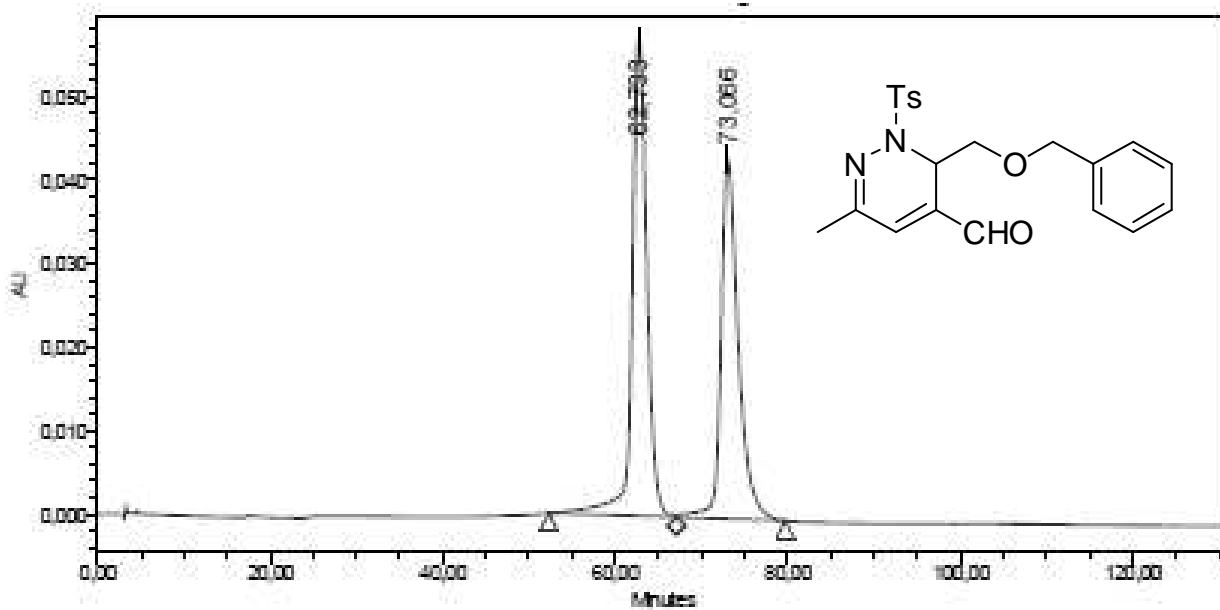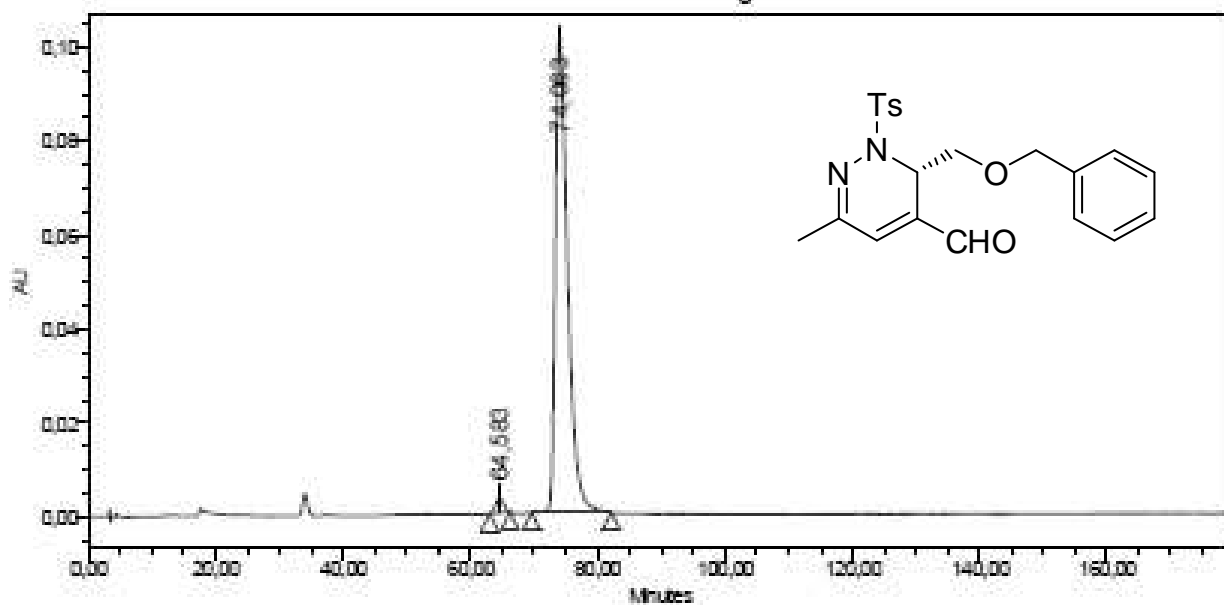

Figure S24: HPLC chromatogram of compound **4h**.



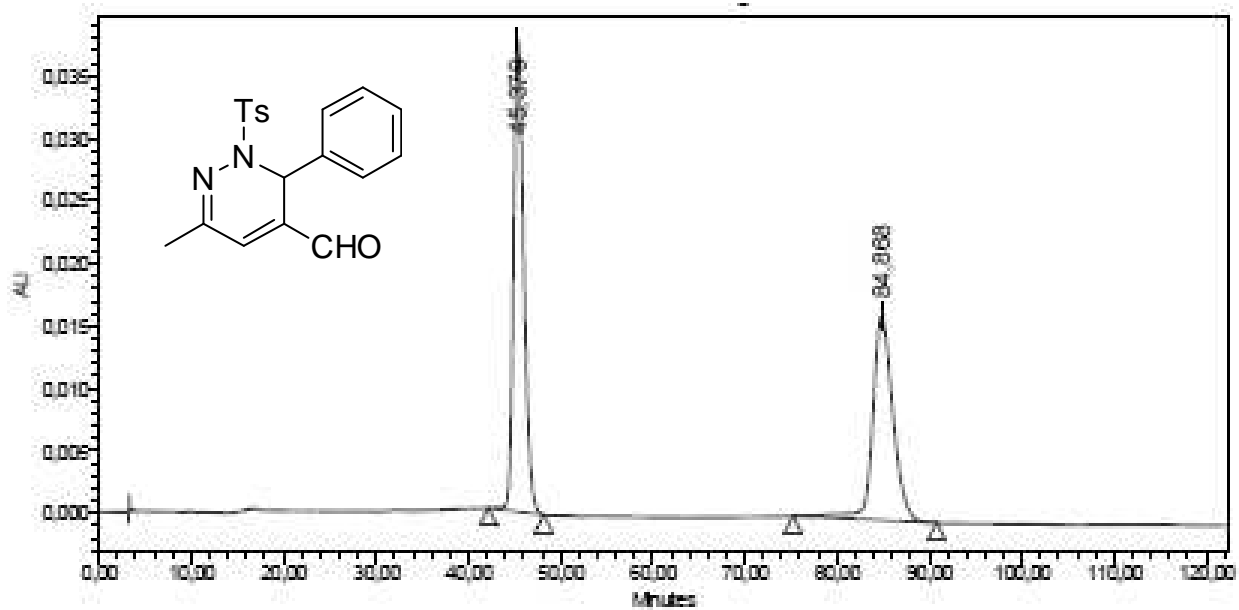

Peak Results

|   | RT     | Area (μV <sup>2</sup> sec) | Height (μV) | % Area |
|---|--------|----------------------------|-------------|--------|
| 1 | 45,379 | 2931694                    | 37732       | 53,97  |
| 2 | 84,868 | 2499990                    | 16318       | 46,03  |

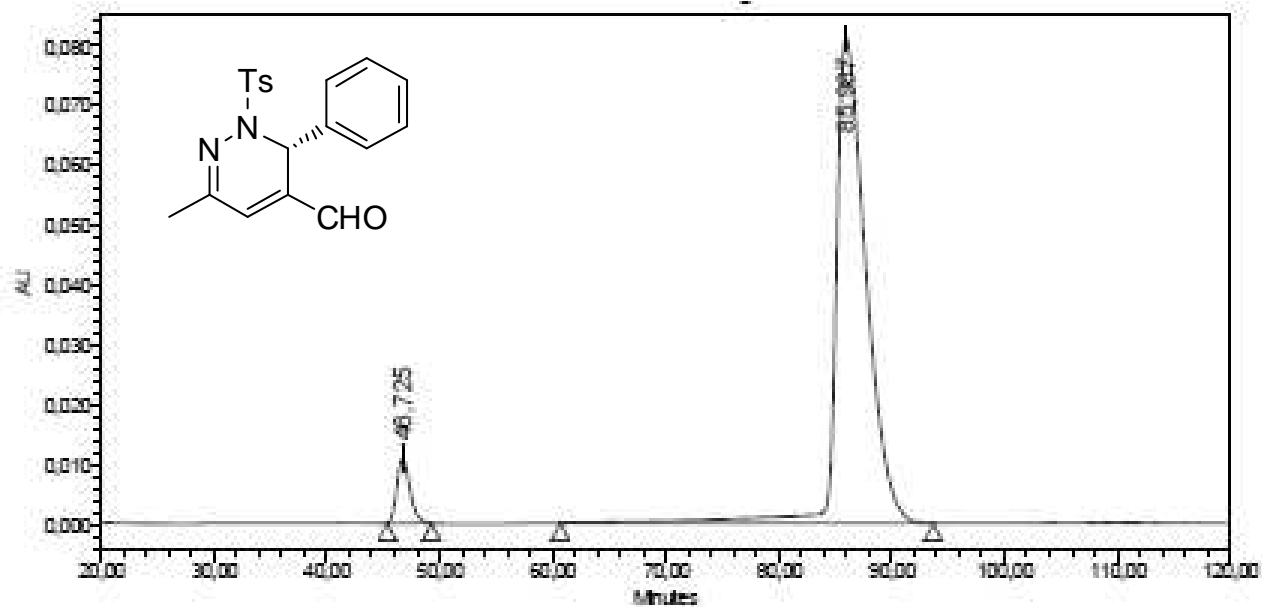

Peak Results

|   | RT     | Area (μV <sup>2</sup> sec) | Height (μV) | % Area |
|---|--------|----------------------------|-------------|--------|
| 1 | 46,725 | 871714                     | 10851       | 5,44   |
| 2 | 85,987 | 15156654                   | 81084       | 94,56  |

Figure S25: HPLC chromatogram of compound 4i.

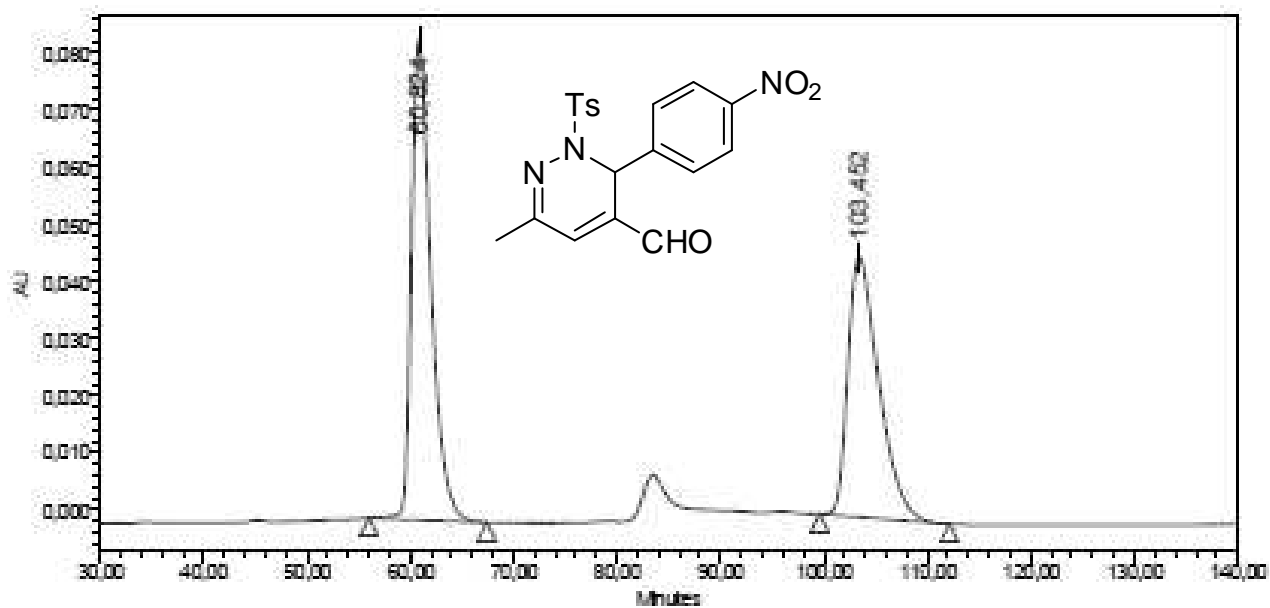

Peak Results

|   | RT      | Area<br>( $\mu\text{V}^2\text{sec}$ ) | Height<br>( $\mu\text{V}$ ) | % Area |
|---|---------|---------------------------------------|-----------------------------|--------|
| 1 | 60,824  | 10799393                              | 84208                       | 53,41  |
| 2 | 103,452 | 9418293                               | 45714                       | 46,59  |

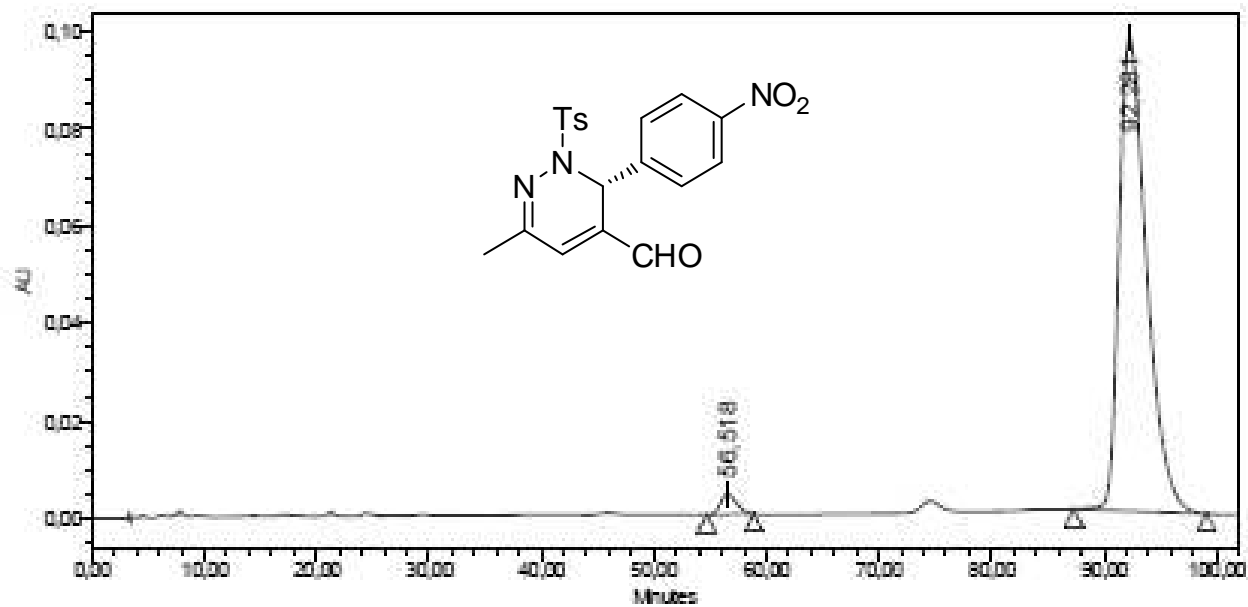

Peak Results

|   | RT     | Area<br>( $\mu\text{V}^2\text{sec}$ ) | Height<br>( $\mu\text{V}$ ) | % Area |
|---|--------|---------------------------------------|-----------------------------|--------|
| 1 | 56,518 | 413213                                | 4115                        | 2,43   |
| 2 | 92,281 | 16622952                              | 97124                       | 97,57  |

Figure S26: HPLC chromatogram of compound **4j**.

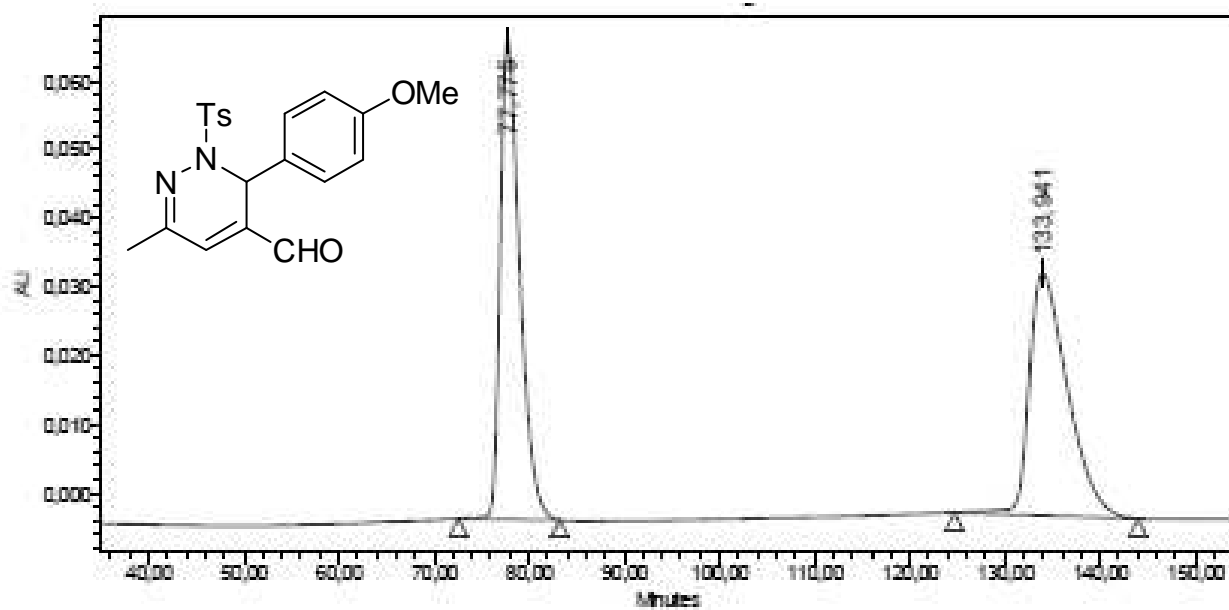

Peak Results

|   | RT      | Area<br>( $\mu\text{V}^2\text{sec}$ ) | Height<br>( $\mu\text{V}$ ) | % Area |
|---|---------|---------------------------------------|-----------------------------|--------|
| 1 | 77,775  | 10037121                              | 63714                       | 50,75  |
| 2 | 133,941 | 9742171                               | 35150                       | 48,25  |

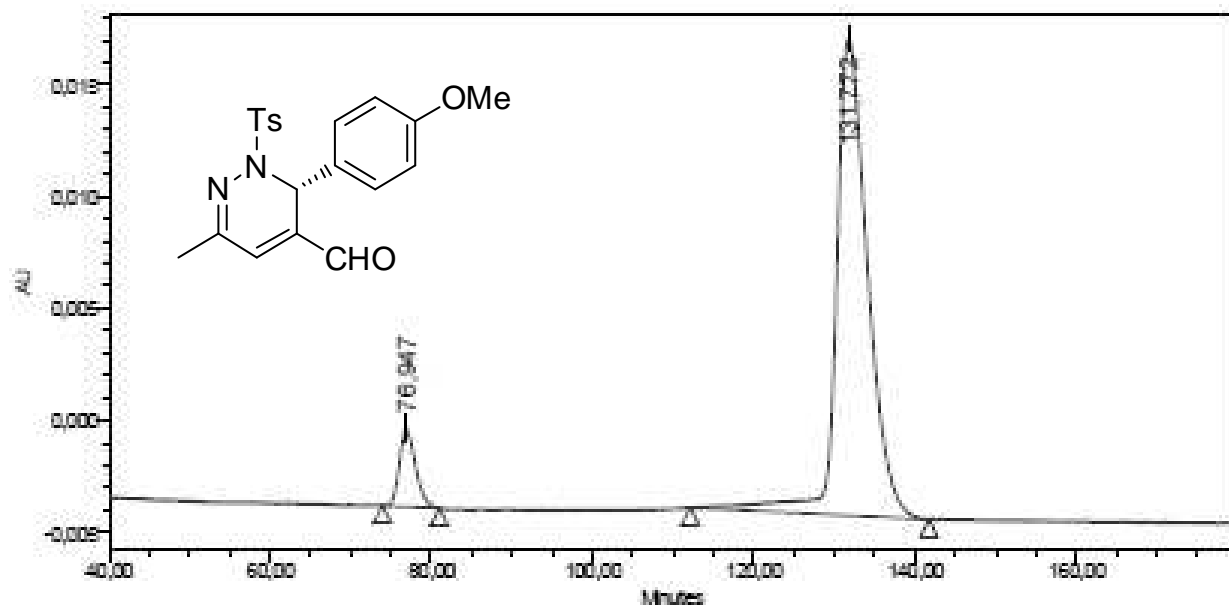

Peak Results

|   | RT      | Area<br>( $\mu\text{V}^2\text{sec}$ ) | Height<br>( $\mu\text{V}$ ) | % Area |
|---|---------|---------------------------------------|-----------------------------|--------|
| 1 | 76,947  | 483294                                | 3472                        | 7,71   |
| 2 | 131,772 | 5786828                               | 21312                       | 82,29  |

Figure S27: HPLC chromatogram of compound **4k**.

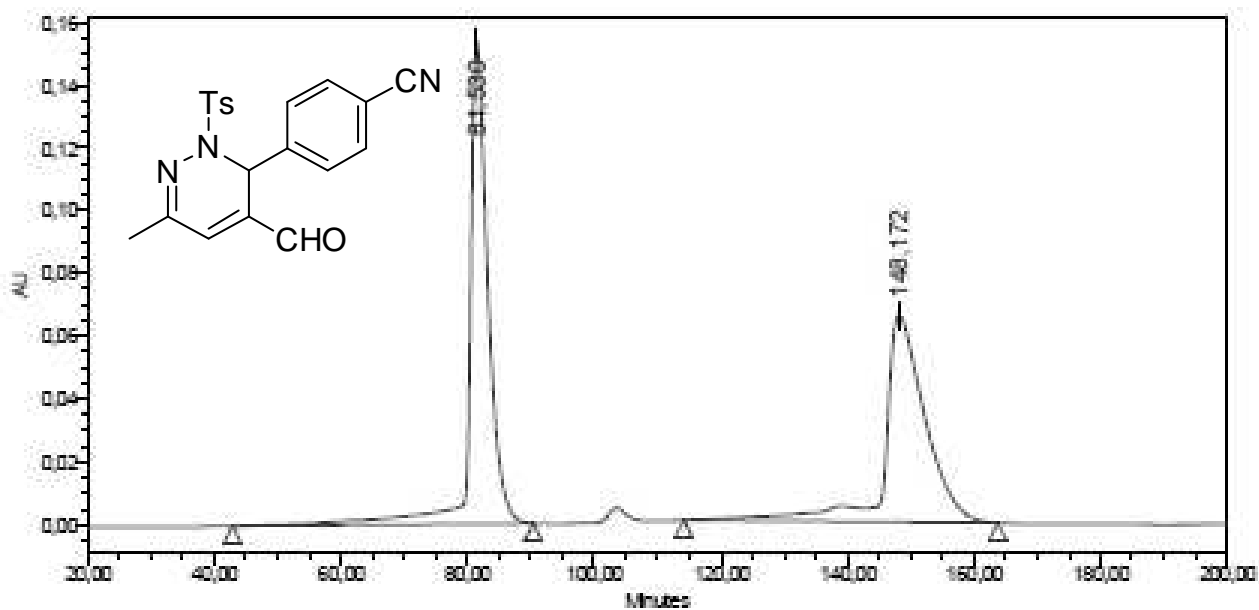

Peak Results

|   | RT      | Area (µV*sec) | Height (µV) | % Area |
|---|---------|---------------|-------------|--------|
| 1 | 81.530  | 31497400      | 153558      | 51.61  |
| 2 | 148.172 | 29532294      | 65695       | 48.39  |

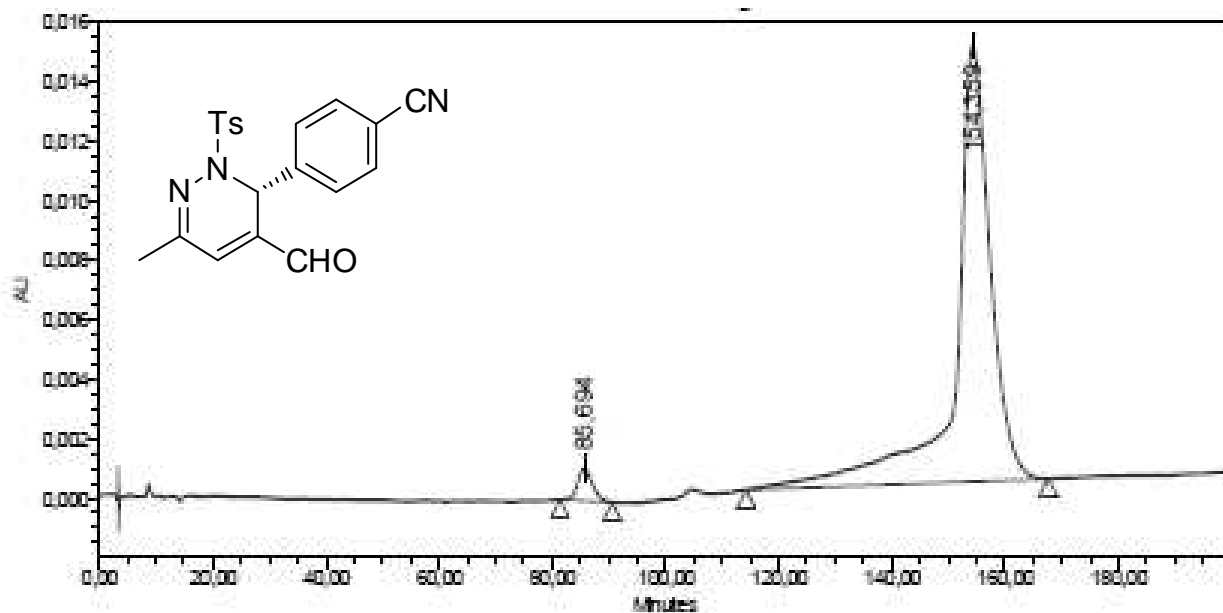

Peak Results

|   | RT      | Area (µV*sec) | Height (µV) | % Area |
|---|---------|---------------|-------------|--------|
| 1 | 85.654  | 200070        | 1099        | 3.03   |
| 2 | 154.359 | 6408058       | 14668       | 96.97  |

Figure S28: HPLC chromatogram of compound 41.

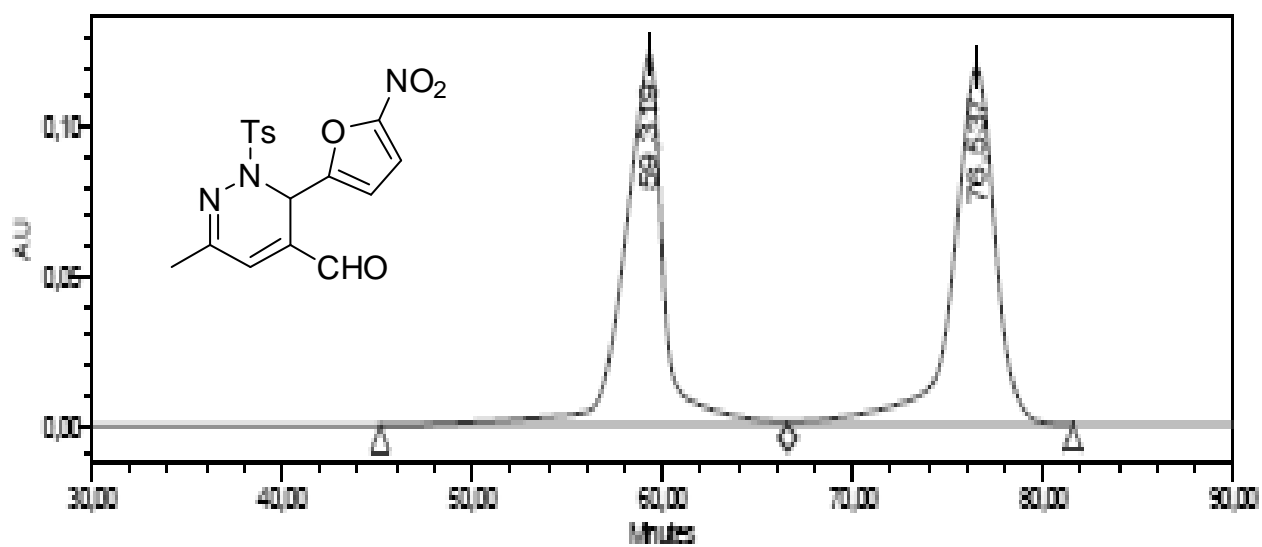

Peak Results

| Name | RT     | Area     | Height | % Area |
|------|--------|----------|--------|--------|
| 1    | 59,319 | 17865546 | 124727 | 48,58  |
| 2    | 76,537 | 18910561 | 119868 | 51,42  |

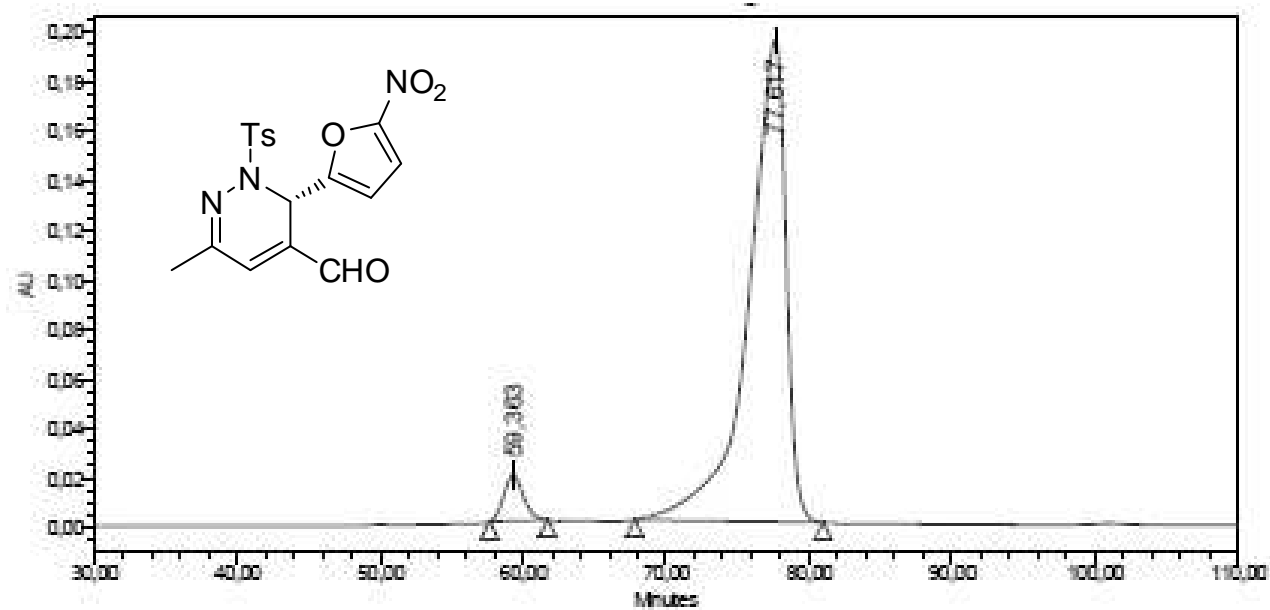

Peak Results

| RT | Area (µV <sup>2</sup> sec) | Height (µV) | % Area |       |
|----|----------------------------|-------------|--------|-------|
| 1  | 59,363                     | 1780838     | 18398  | 4,84  |
| 2  | 77,617                     | 34885419    | 194310 | 95,16 |

Figure S29: HPLC chromatogram of compound **4m**.

### HPLC chromatograms of racemic and enantioenriched compound **5j**

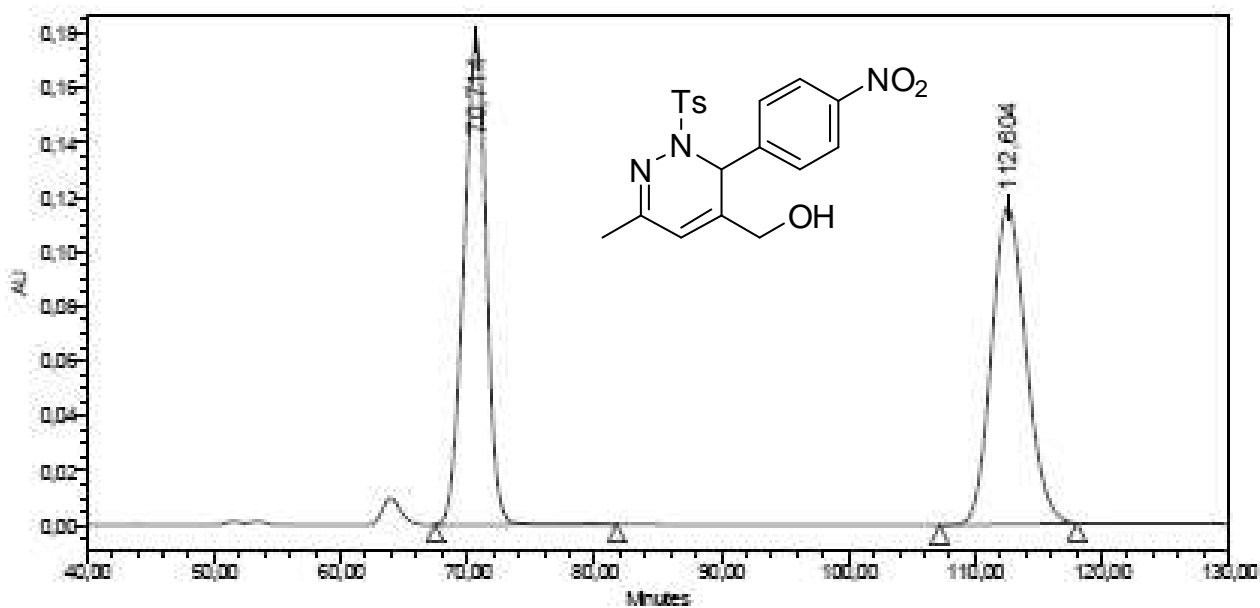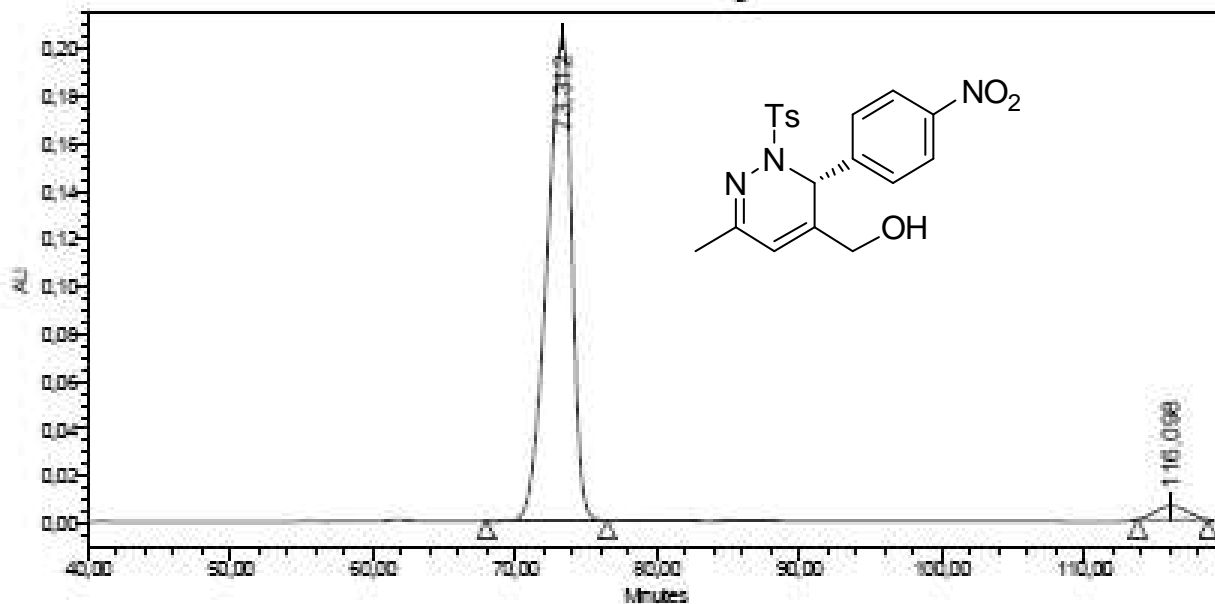

Figure S30: HPLC chromatogram of compound **5j**.
